# Supplementary material for: Potential Therapeutic Candidates against Chlamydia pneumonia Discovered and Developed In Silico Using Core Proteomics and Molecular Docking and Simulation-Based Approaches
Source: MDPI journal article supplement (doi:10.3390/ijerph19127306), 2022-06-15
Supplement: s1 [file s1]

### Amino acid sequences of final proteins

>tr|Q9Z8C4|Q9Z8C4\_CHLPN Penicillin-binding protein OS=Chlamydia pneumoniae OX=83558  
GN=pbp3 PE=4 SV=1

MSYRKRSTLIVLGVFALYALLVLRYYKIQICEGDHWAAEALGQHEFCVRDPFRRGTFFAN  
TTVRKGDKDLQQPFAVDITKFHLCADPLAIPFCHRDDEIIQGILQFIEGQTYDDLSLKLDK  
KSRYCKLYPLLDVSVHDRLSLWWKGYATKHRLPTNALFFITDYQRSYPFGKLLGQVLHTL  
REIKDEKTGKAFPTGGMEAYFNHILEGDVGERKLLRSPLNRLDTNRVIKLPKDGSDIYLT  
INPVIQTIAEEELERGVLEAKAQGGRLILMNSQTGEILALAQYFFDPTNYKEYFNKER  
IEHTKVSFVSDVFEPGSGIMKPLTVAIALQANEEASLKSQKKIFDPEEPIDVTRTLFPGRK  
GSPLKDISRNSQLNMYMAIQSSNVYVAQLADRIIQSLGVAWYQQKLLALGFGRKTGIEL  
PSEASGLVPSPHRFHINGSLEWSLSTPYSLAMGYNILATGIQMVQAYAILANGGYAVRPT  
LVKKIVSASGEYHLPTKEKTRLFSEEITREVVVRAMRFTTLPGSGGFRASPKHHSSAGKT  
GTTEKMIHGKYDKRRHIASFIFGTPVESSEGNFPPLVMLVSIDDPEYGLRADGTKNYMGG  
RCAAPIFSRVADRTLLYLGLIPDKKLRNCDEEAAAALKRLYEENRSPKQGGTR

>tr|Q9Z8X6|Q9Z8X6\_CHLPN Probable ATP-dependent 6-phosphofructokinase OS=Chlamydia  
pneumoniae OX=83558 GN=pfkA\_2 PE=3 SV=1

MHPLYVDLDTIISYSPPLPKEFQEAASLIAPDTSKSPVVPVGVKTLFPQTYHLPYLKF  
VQGENVVHTPLKVGVMFSGGPAPGGHNVIQGLFNSLKDFHPDSSLVGVFNNGDGLTNNKS  
IDITEEFLSKFRNSGGFNCIGTGRKKIVTPEAKEACLKTAEALDLDGLVIIGDGSNTAT  
AILAEYFAKRRPKTSIVGVPKTIDGDLQHTFLDLTFGFDATATKFYSSIIISNRDALSCK  
AHYHFIKLMGRSASHIALECALQTHPNIALIGEEIAEKNLPLKTIHKKICSVIADRAAME  
KYYGVILIPEGIIEFIPEIINLITEIESLSEYEDKISRLSPESQRLKSFAPPIEQILN  
DRDAHGNVYVSKISVDKLLIHLVSNHLQQYFPNVPFNAISHFLGYEGRSGLPTKFDNTYG  
YSLGYGAGILVRNHCNGYLSTIESLACPFMKWKLRAIPVVKMFTVKQQADGTLQPKIKKY  
LVDIGSTAFRKFKLYRKIWALEDSEYRFLGPLQIETPPMEMHSDNFPPLTLLLNHNFWQRHQ  
GCIEIPDTTY

>sp|Q9Z7Y2|MURA\_CHLPN UDP-N-acetylglucosamine 1-carboxyvinyltransferase OS=Chlamydia  
pneumoniae OX=83558 GN=murA PE=3 SV=1

MQIAQVFGCGRLNGEVKVSAGAKNAATKLLVASLLSDQKCTLRNVPDIGDVSLTVELCKSL  
GAHVSWDKETEVLEIYTPETIQCTRVPTFSNVNRIPILLGALLGRCPEGVYVPTVGGDA  
IGERTLNFHFEGKQLGVQISSDSSGYAKAPRGLKGNYIHLPPPSVGATENLILAAIHA  
KGRTVIKNVALEAELDVLFLQKAGADITDNDRTIDIFGTGGLGSVDHTILPDKIEAA  
SFGMAAVVSGGRVFRNAKQELLIPFLKMLRSIGGGFLVSESGIEFFQERPLVGGVVLET  
DVHPGFLTDWQQPFAVLLSQAQGSSVIHETVHENRLGYLHGLQHMGAECLFHQCLSTKA  
CRYAIGNFPHSAVIHGATPLWASHLVIPDLRAGFAYVMAALIAEGGGSIIENTHLLDRGY  
TNWVGKLRSLGAKIQIFDMEQEELTTSPKSLALRDASL

>tr|Q9Z7N2|Q9Z7N2\_CHLPN D-Ala-D-Ala Carboxypeptidase OS=Chlamydia pneumoniae OX=83558  
GN=dacF PE=4 SV=1

MKRPFPTYLCIIFYGSCASLSLHAGLSFPEVRGATAAVVHADSGKVFYDKDIDAVIYPAS  
MTKIATATFILKHYPTVLDTLIKVKQDAIASITPQAKKQSGYRSPPHWLETGSGTIQLHL  
REELLGWDLFHALLVCSANDAANVLAMACCGSVEKFMDKLNFFLKEEIGCTHTHFNNPHG  
LHHPNHYTTTRDLISIMRCALKEPPFRGVISTTSYKIGATNLHGERILSPTNKLLLPGST  
YHYPPALGGKTGTTKTAGKNLIMAAEKNRLLVTIATGYSGPVSVDLYQDVIALCETVFNE  
PLLRKELVPPSDCLQLEIANLGKLSCLPEGLYYDFYASEDREPLSVSFIAHADAFPIEQ

GDLLGHVWFYDDEGKKISSQPFYAPCRFERTIKPWKLYMKRVFTSYRTYMSITMLLMYFR  
IRKHKRYKNLKHYSKI

>tr|Q9Z744|Q9Z744\_CHLPN Nifs protein, putative OS=Chlamydia pneumoniae OX=83558  
GN=yfhO\_2 PE=4 SV=1

MEKPQNRKAPRIFWLNNQVAIPPSERVKESYALHSDIFSLPPGSALKLAEKTEESIRQLV  
GLKDSHIFRFVPHFPHVHVHIVLAALVENLSMFQGRNHIILPAHDQQLINSLCRHQGLGT  
TYDWVTVNHEGRIVEEQLIETLSPRSLLFSLSAAHGLTGVIQPLDPLLSLCKDRRILLHL  
DISDILGRAPLTPEILNADIITFSSAALGGMGSIGGIFIRKSLERVFSSWFPHTSASLC  
FSAVAAMQTACEERISALPLFTFHTSNLCKKLIQELQSVLPSIQLAFSEVQNRLPNIVVA  
AIPDIPAESLAFHLHQGGIYPSLGYERFQPLAQVLQNCGISPFLCHSALHFSALTERSKDL  
EFSKLARAMHDAIKHLTPLLGSSS

>sp|Q9Z8P0|FABH\_CHLPN 3-oxoacyl-[acyl-carrier-protein] synthase 3 OS=Chlamydia  
pneumoniae OX=83558 GN=fabH PE=3 SV=1

MWFSVNKNKKAIIWATGSYLPEKVLSNADLEKMVDTSDEWIVTRTGIKERRIAGPQEYTS  
LMGAIAAEKAIANAGLSKDQIDCIIIFSTAAPDYIFPSSGALAQAHLGIEDVPTFDCQAAC  
TGYLYGLSVAKAYVESGTYNHVLLIAADKLSSFVDYTDNRNCTVLFQDGGAACVIGESRPG  
SLEINRLSLGADGKLGELLSLPAGGSRCPASKETLQSGKHFIAMEGKEVFKHAVRRMETA  
AKHSIALAGIQEEDIDWFVPHQANERIIDALAKRFEIDESRVFKSVHKYGNTAASSVGIA  
LDELVHTESIKLDDYLLLVAFGGGLSWGAVVLKQV

>sp|Q9Z7G1|HEM2\_CHLPN Delta-aminolevulinic acid dehydratase OS=Chlamydia pneumoniae  
OX=83558 GN=hemB PE=3 SV=1

MSSLTLSRRPRNRKTAAIRDLAETHLSPKDLIAPFFVKYGNNIKEEIPSLPGVFRWSL  
DLLLKEIERLCTYGLRAVMLFPIIPDDLKDAYGSYSSNPKNILCHSIHEIKNAFPHLCLI  
SDIALDPYTTHGHGDGIFLNGEVLNDESVRIFGNIATLHAEMGADIVAPSDMMDGRIGYIR  
SKLDQSGYSKTSIMSYSVKYASCLYSPFRDALSSHVTSGDKKQYQMNPKNVLEALLESSL  
DEEEGADILMVKPAGLYLDVIYRIRQNTCLPLAAYQVSGEYAMILSAFQQGWLDKETLFH  
ESLIAIKRAGADMIISYSAPFILELLHQGFEE

>tr|Q9Z9C3|Q9Z9C3\_CHLPN Acetyl-coenzyme A carboxylase carboxyl transferase subunit beta  
OS=Chlamydia pneumoniae OX=83558 GN=accD PE=3 SV=1

MRLFSYDKPKIKVQKIKADGFSGLKCNHCHEMIHANELGQYNCCPKCSYHYRITAIER  
VKLLADKDSWRPLYTDLKSQDPLEFIDTDTYANRLEKARKNTTESEGVIVGICTIGLHPV  
ALAVMDFNFMAGSMGAVVGEKLTRLIEEAIETRLVPVIVSASGGARMQESVFSLMQMVKT  
SAALAKLHEAGLPYISVLTNPTSGGVITASFAALGDIIIAEPKALICFAGPRVVAQVIGED  
LPEGAQKSEFLLEHGMIDKIVERKELKTTLQTLDDYFLAQEYTGKSKAPRDL SKRLKEI  
FLLTDDSE

>tr|Q9Z7T6|Q9Z7T6\_CHLPN Lipoate--protein ligase A OS=Chlamydia pneumoniae OX=83558  
GN=lplA\_2 PE=4 SV=1

MPTTNCIFLDLRGHSILHQLQIEEALLRVANQNFCIINSGAKDSIVLGISRNLNQDVHIS  
RAQADHIPIIRRYSGGGTVFIDSNTLMVSWIMNSSEASAQPQELLAWTYGIYSPLLPNTF  
SIRENDYVLGHKKIGGNAQYIQRHRVHHTTFLWDIDLDKLSYYLPIPQQQPTYRNQRSH  
EEFLTTLRPWFPSRDDFLERIKASGSLFTWEEFLDNELEEILAQPHRKATTVLN

>sp|Q9Z7H2|RS4\_CHLPN 30S ribosomal protein S4 OS=Chlamydia pneumoniae OX=83558 GN=rpsD  
PE=3 SV=1

MARYCGPKNRVARRFGANIFGRSRNPLLKKPHPPGQHGMQRKKKSDYGLQLEEKQKCLKAC  
YGMIMEKQLVKAFKEVIHKQGNVAQMFLERFECRLDNMVYRMGFAKTIFAAQQLVAHGHI  
LVNGRRVDRRSFFLRPGMQISLKEKSKRLQSVKDALESKDESSLPSYISLDKTGFKGELL  
VSPEQDQIEAQLPLPINISVVCEFLSHRT

>sp|Q9Z8P3|ACP\_CHLPN Acyl carrier protein OS=Chlamydia pneumoniae OX=83558 GN=acpP PE=3  
SV=1

MSLEDDVIAIIVEQLGVDPKEVNENSSFIEDLNADSLDLTELIMTLEEKFAFEISEEDAE  
KLRTVGDVFTYIKKRQAEQ

>sp|Q9Z8L0|BSDC\_CHLPN 4-hydroxybenzoate decarboxylase subunit C OS=Chlamydia pneumoniae  
OX=83558 GN=CPn\_0328 PE=1 SV=1

MSFLRRHISLFRSQQLIDVFAPVSPNLELAIEHRRVIEDQGPALLFHNVISSFPVLTN  
LFGTKHRVDQLFSQAPDNLIARVAHLISSTPKLSSLWKSRLDLKRISLGLKKARFRFP  
FVSMSSVNLDHLPLLTSPWEDGGAFLTPLVYTESPTLTTPNLGMYRVQRFNQNTMGLHF  
QIQKGGGMHLYEAEQKKQNLVSVFLSGNPFLTLSAIAPLPENVSELLFATFLQGAKLLY  
KKTNDHPHPLLYDAEFILVGESPAKRRPEGPFGDHFGYYSLQHDFPEFHCHKIYHRKDA  
IYPATVVGKPYQEDFYIGNKLQEYLSPLFPLVMPGVRRLKSYGESGFHALTAAVVKERYW  
RESLTALRILGEGQLSLTKFLMVTDQEVPLDRFSVVLETILERLQPDRLIIFSETAND  
TLDYTGPSLNKSGKGFIMGIGKAIRDLPHGYQGGKIHGVQDIAPFCRGCLVLETSLEDRC  
IKSLHHPDLKSWPLIILADNLRETIQSEKDFLWRTFTRCAPANDLHALHSHFATHRPNY  
NFPFVIDALMKPSYPKEVEVDPSTKQKVSEWRWHAYFPNKETFYI

>tr|Q9Z8Y8|Q9Z8Y8\_CHLPN Oligopeptide Binding Protein OS=Chlamydia pneumoniae OX=83558  
GN=oppA\_2 PE=4 SV=1

MLRFFAVFISTLWLITSGCSPSQSSKGIFVVMKEMPRSLDPGKTRLIADQTLMRHLYEG  
LVEEHSQNGEIKPALAESYTISEDGTRYTFKIKNILWSNGDPLTAQDFVSSWKEILKEDA  
SSVYLYAFLPIKNARAI FDDTESPENLGVRALDKRHLEIQLETPCAHFLHFLTLPPIFFPV  
HETLRNYSTSFEEMPITCGAFRPVSLEKGLRLHLEKNPMYHNKSRVKLHKIIVQFISNAN  
TAAILFKHKKLDWQGPPWGEPIPPEISASLHQDDQLFSLPGASTTWLLFNIQKKPWNNAK  
LRKALSLAIDKMLTKVVYQGLAEPTDHILHPRLYPGTYPERKRQNERILEAQQLFEEAL  
DELQMTREDLEKETLTFTSFYSYGRICQMLREQWKKVLKFTIPIVGQEFFTIQKNFLEG  
NYSLTVNQWTAAFIDPMSYLMIFANPGGISPYHLQDSHFQTLLIKITQEHKKHLRNQLII  
EALDYLEHCHILEPLCHPNLRIALNKNIKNFNLFVRRTSDFRFIEKL
