# Supplementary material for: Potential Therapeutic Candidates against Chlamydia pneumonia Discovered and Developed In Silico Using Core Proteomics and Molecular Docking and Simulation-Based Approaches
Source: MDPI journal article supplement (doi:10.3390/ijerph19127306), 2022-06-15
Supplement: s1 [file s1]

### Sequence of Cytoplasmic proteins

>core/3/1/Org1\_Gene886

MASSSNSTKQDGIPSWVNPVQWNRASQVGDQEANSLTPEAQTSRSWFSDRKHFLVLDVSLEEMENNDLKKYSRYKTIILATLV  
TVAITCIVPISMVFGIPMWVPCILIFGAGLSSAFLSHRLQSKCKEIHLYRAYQIYRQQLLSQYPDLRKSTLYKYSITHVKPKKGFVGKLVE  
NLRPDLHKNKDDGGAAADSRLDFAGYGVKHYQTDALLGVSGVNSVEWQRLASLIMSVKNDILNDVGSREPIDKAQRSALVVSQKDIG  
GEIQPGGILDISRDILAICGYGMNVGVEAKKAIDQYKKWYLNSTFIWNPQLPAIAQSYLLEQQRHLDYAAKIFQDLSALTTAHGTGQ  
ALEDLSLLCYDQLIESKGVGEKIIASHQKHLDLAMQDSCDQEHLLKWSNLYHVFSITIKEFTEGKLEQNEVVSRIQRLRGKLEKSKCSI  
LGNCRTNAEYATKSEKKLADYLLQIGDREPFLTGMHKAIAATGKAIQKQVEGVISQHPKQIMMLRCSIERLEGMLRREDWGAILQKNE  
DEVLALKSTMEAQLQGFKDLVGTWEGKYQEFKKNKLSKVLVYDFTKSYSNLLNRLEVLAESSTDDLVLHVDRMSEDLLKKTIEIDGNL  
FQVTPEELSLAREYQGLMNELPLIVQEGNRLQEAISSEGVSSQGLMLLNLLNRDEKINKNIESSRKNLVIAIAKQARSDARNIDSQGLAPL  
IQRNRASLDNILQNMFLNGSIRNIHALDTETLVATSSNMFSAMHTFDWNIYTNLLDVLEIQSKPAPAPMENPDLPGALPEEVQDAVA  
EDVSGTHRLHHQVLKRRCADLKNMISQLQKSINKWGMKAIVLGIVAVLFCVLSAIFIGQNILSLLILSCVGLLLTQVCPLIFDRISKSKEFE  
KQVLETAQSLIPATKILPSEFNNDLNLRLAKLQDNLNLEGGPTWARNIVSDLEGIPTKEKSLKDLTKEFRKDSKNLNLKRIKRRFKEGLGQ  
EAPVVRPTIPQDIRGAEVFAELHRELEHLQKQKEEISIRGDALVQERMGLCLEKSKYDNEKAHAAAMTKKVGLQNIIDRLQKNNETYV  
RIQNFRTLIQEKLRDRTVQEIDVVKEAKELHELAIIYGNSTSGKSQKQRAKKQFKENVLHIAAGKGQLELLEAYLNVTASQGLCRHQM  
ASFRERILLNPDGAKHGEAERTLASREEMKTLGLSYLTPFVRFSSPESTQSGYNQILKVREQLFDIEQRLQNQETVSPEDYAAVQAALA  
AYVRKHESLIVSTYGLGAQEGQTSSKVTTLMRDLHAVEELVEMGVETRYLRNRSQDILHRVHVSVLHSHLRDSDSSNGIIDVVKKLFELLN  
NNGNNPNDPECQKYMQILLDAPVSLLYGAFKSFKNFLLNFTELNIANSTKAAEEEAKRYVEEKGRGFETYWEEAKQRLEAIAAELDDL  
RNQETLLEQEIRLANLKISIFSDLNLREKVSVEKAAEEEEIQGIEQYAEQQGIEDLELKQKFEDLQKKLEALEERLLQIGRRIDSSVDKQKE  
LLGLLGREEAA

>core/8/1/Org1\_Gene500

MTWIPLHCHSQYSVLDAMSSIKDFVAKGQEFGIPALALTDHGONLYGAVDFYKECTQKGIQPIIGCECYIAPGSRFDKKKEKRSRAAHHLI  
LLCKNEQGYRNLCILTSLAFTGEFYFPRIDKDLLRQYSEGLICLSGLSSVSDAALKSPEALLLELQWFQDLFKDDYFTEVQLHKMSEESI  
AGFKEEWLQKEYSLIEKQIKVNTAVLEASKRLGIPTVATNDIHYINANDWQAHEILLNVQSGETVRIAKQNTHIPNPKRKVYRSREYFF  
KSPAQMAELFKDIPEVISNTLEVAKRCDFTDFSKKHYPYVPESLKTLSYTEEDRYQASAVFLKQLAEALPKKYSSEVLAHIAKKFPHR  
DPIDIVKERMDMEMAIIIPKGMCDYLLIVWDIIHWAKANGIPVGPGRGSGAGSVLLFLLGITEIEPIRFDLFFERFINPERLSYDPIDIDICM  
AGRERVINYAIERHGKDNVAQIITFGTMKAKMAVKDVGRITLDMALSKVNHIKHIPDLNTTLSKALETDPDLHQLYINDAESAQVIDM  
ALCLEGSIRNTGVHAAGVIICGDQLTNHIPICISKDSTMITTQYSMKPVESVGMLKVDLLGLKTLTSINIAMSIAIEKKTGQSLAMATLPLD  
DATTFSLLHQGKTMGIFQMESKGMQELAKNLRPDLFEEIIMAGALYRPGPMDMIPSFINRKHGKEIEYDHPLMESILKETYGIMVYQE  
QVMQIAGALASYSLGEGDVLRRAMGKKDFQQMEQEREKFKRACNNGIDPELATVIFDKMEKFAAYGFNKSHAAAYGLITYTTAYLK  
ANYPKEWLAALLTCDSDDIEKIGKLIREAQSMGIPILPHINVSSNHVFATDEGIRFAMGAIGIGRGLIESIVEERDHHGPYESIRDFIQRS  
DLKKVSKKSIESLIDAGCFDCFDSNRDLLASVEPLYEAIKDKKEAASGVMTFFTLGAMDRKNEVPICLPKDIPTRSKELLKKEKELGIY  
LTEHPMDTVRDHLSRSLSVVLAGEFENLPHGSVVRTVFIIDKVTTKISSKAQKKFAVLVSDGIDSYELPIWPDMYEEQQELLEEDRLIYAIL  
VLDRSDSLRISCRWMKDLNENIIECDQAFDRIKNQVQKMSFTMSTSGKETAKGNKPNENGHTQALAPVTLSDLNLRLHSHL  
CILKKIVQKHPGSRTLVLVFTQDNERVASMSPDDAYFVCEIDIELRQELVTADLPVRVITV

>core/12/1/Org1\_Gene955

MKRPKKFPIYLSIAQKTNRLLSGIVIAFAVIALRLWYLAVVEHEQKLEEAYKPQIRVLPQYVERATICDRFGKTLAVNQLQYDVSVAYGAI  
DLPTRAWRVDEHGHKQLIPVRKHYIMCLSELLSQELHLDREAIEDAIHAKASVLGSVPYLVAANVSERTYCLKMLSKDWPGLVHVEAVV  
RRHYPQESVASDILGYVGPISLQEYKRVTELSQLRECVRAYEEGEDPKLPEGLASIDQVRALLESVESNAYSLNALVGKMGVEACWDS  
KLRGKIGKKPILVDRRGNFQEMEGAVPEAPGTKLQLTSAELQAYADALLEYEKTETFRSAKSLKKREKLPLFPWIKGGAIALDPNNG  
EILAMASSPRYRNNDNFVNAKVAEDSKAVRSSIYRWLENKEHIAEIYDRKVPLIRERRNPLTGLCYEEILPTFDCFLDFLPENSVIKLQKLR  
NSFVGQAIEVQNLVTRLLSLFPYEEGTCPCSAIFDAVFPNEEGHILIQEVISLREQKWIMECLNQHKADIEELKEALDQVFNELPANYDKIL  
YTDILRLIVDPERFSPVLPSEVHRLSLSEFTELQGRYVVLRSASFSTILEDAFIEVHFKSWRKSEFLQYLAARKQEEALRKQRYPTPYVDYLEEE  
KTRQYKMFCEHLDTFLAYLFSKTPYKEGLEPYDILDWINELDNGAHRALSWHEHYLFLKERVSHLSEHLPALFSTFREFNELQRPLL  
KYPISIVRNKRQTEQDLAASFYPVYGYGLRPHAYGQAATLGSIFKLVSAYSVLSQRILWGHNEEPANPLVIIDKNSFGYRSSKPHVGF  
DGTPIPTFFRGGSLPGNDFMGRGFIDLVSALMSSNPYFSLLVGEGLDPEDLADAASLFGFGEKTGLGLPGEYAGRVPHDLAYNRSGL  
YATAIGQHTLVVTPVLTAVMLASLVNGGVVYVPKLLGEWEGEHVSYLSSKKKRTIFMPDAVVEVLKTGMRNVIWGQYGTARAIQSQ  
FPPQLLSRIIGKTSTAESIMRVGLDREYGTMMKMDIWFAAVGFSDQDLSLPTIVVIVYLRGEGFRDAAPMAVKMIDMWEEKIQQRESF  
LRG

>core/24/1/Org1\_Gene643

MLGFLKRFFGSSQERILKKFQKLVDKVNIDEMLTPLSDDELNRKTAELKQRYQNGESLDSMLPEAYGVVKNVCRRLAGTPVEVSGYH  
QRWDMVPYDVQILGAIAMHKGFIEMQTGEGKTLTAVMPLYLNALTGKPVHLVTVNDYLAQRDCEWVGSVLRWLGLTTGVLVSGT  
LLEKRKKIYQCDVVYGTASEFGFDYLRDNSIATRLEEQVGRGYFFAIIDEVDSILIDEARTPLIISGPGEKHNPVYFELKEKVASLVYLQKELC  
SRIALEARRGLDSFLDVDILPKDKKVLEGISEFCRSLWLVSKGMPNLRVLRVREHPDLRAMIDKWDVYHAEQNKESLERLSELYIIVD  
EHNNDFELTDKGMQQWVEYAGGSTEEFVMMMDMGHEYALIENDETSPADKINKKIAISEEDTLRKARAHGLRQLLRAQLLMERD  
YIVRDDQVIIDEHTGRPQPGRRFSEGLHQAIEAKEHVIRKESQTLATVTLQNFFRLYEKLAGMTGTAITESREFKEIYNLYVLQVPTFKP  
CLRIDHNDEFYMTEREKYHAIVNEIATIHGKGNPILVGTESVEVSEKLSRILRQNRIEHTVLNAKNHAQEAIIAGAGKLGAVTVATNMA  
GRGTDIKLDNEAVIVGGLHVIGTTRHQSRRIDRQLRGRCARLGDPGAFFLSFEDRLMRLFASPKLNTLIRHFRPPEGEAMSDPMFNR  
LIETAQKRVEGRNYTIRKHTLEYDDVMNKQRQAIYAFRHDVLHAESVFDLAKEILCHVSLMVASLVMSDRQFKGWTLPLNEEWITSSF  
PIALNIEELRQLKDTDSIAEKIAAELIQEFQVRFDHMEVGLSKAGGEELDASAICRDVVRSVMVMHIDEQWRIHLVDMDLLRSEVGLRT  
VGQKDPLEFKHESFLLFESLIRDIRITIARHLFRLELTVEPNPRVNNVIPTVATSFHNNVNYGPLELTVVTDSEDQD

>core/58/1/Org1\_Gene679

MKKLYHPTLFLRPLIRLSLIFALSLTLISGNFPQQKSFGHCCADMHSALISGKNCEELFADFIERVLADRETLTARDWGTVVVLVREYLLKI  
RKGDCDYGVKILQKLLALRLPKDARKDLQILWHRLNPEQAPLRDVVDQLFTIGCHESLQDHLLFELYTVTLHSGYENRKQDMLLAKEQG  
DYKKAIELAKELVAALEKGSCSPHPEIVQIEKTFLOKTLALQIKVAQEAQESCDALLTPYCLSEIAYTEAMDALVLRARGEVSRTNEVDS  
VLLSHALQHLPFAREKAPELEVLIDHGAYLESTLLYYAFSLLELYHQNKDFASLERLLEKGDVAVFVPEHPYFPEYGFLLGAYFYAKGKYES

AEKVFLQIIDPAVKLGATFARAYEYLGCIAYVQNHYEKAEYFLRAYKSWGREESGIGLFLAYAVQKKKTACEDMLYHPKFSFTYRHLLDS  
LCSLSYPHGENKGSSAIQVRVHRAVPELSEIYSRCIYDMIKYRNVITYTHPIELAYNQVRNLEKRNLEEICRDAQDPEYDKALAFW GALQSG  
ASVPRSLIESSDVDEARITIRCYEALYFHNPDIAI MLPQAFSEECNSWQTALRLVWTLVRPKGAPNHAKYWDHLVLRPHGDSLYFFGY  
DLQEYLGKEDALKHLSVFAELFPKSSLLSLVYYLQGYSESSALRKVGWVFKALEEFTEISWSGHEMKTWAYIYYMVKLDLADTYISLGNF  
SQAVHILEEVKEDWQVASHPKLHFLKGEDCYLAMELRWVEGLAYAYFQLHETAHLSNHLEHVEKNLISPRSYRDYYGESLQRTLGLCQ  
RFLGV

>core/65/1/Org1\_Gene438

MRIPITLLQTYFSEPLSTKEILEACDHIGIEAEIENTTLYSFASVITAKILHTIPHPNADKLRVATLTDGEKEHQVVC GAPNCEAGLIVALALP  
GAKLFDSEGQAYTIKKSKLRGVESQGMCCGADELGLDELQIQERALLELPEATPLGEDLATVLGNTSLEISLTPNLGH CASFLGLAREICH  
VTQANLVIPKEFSFENLPTTALDMGNDPDCPFFSYVVITGISAQPSPIKLQESLQALKQKPINAIVDITNYIMLSLGQPLHAYDASHVALD  
SLRVEKLSTPESLTLNGETVLLPSGVPVVRDDHSLGLGGVMGAKAPSFQETTTTTVIKAAAYFLPEALRASQKLLPISESAYRFRTRGIDP  
QNVVPALQAAIHYLEIFPEATISPIYSSGEICRELKEVALRPKTLQRILGKSFSIEILSQKLQSLGFSTTPQETSLLVKVPSYRHDINEEIDLVEE  
ICRTESWNIETQNPVSCYTPYIKLKRETAGFLANAGLQEFFTPDLLDPETVALTRKEKEEISLQGSKHTTVLRSSLLPGLLKS AATNLNRQA  
PSVQAFEIGTVYAKHGEEYQETQTLAILLTEDGESRSWLPKPSLSFYSLKGWVERLLYHHHLSIDALTLESSALCEFPYQQGVLR IHKQS  
FATLGQVHPELAKKAQIKHPVFFAELNLDLLCKMLKKTTKLYKPYAIYPSSFRDLTLTPEDIPANLLRQKLLHEGSKWLESVTIISIYQDKS  
LETRNKNVSLRLVFQDYERTLSNQDIEEEYCRLVALLNELLTDTKGTINS

>core/67/1/Org1\_Gene856

MLLLISGALFTLGIPGLTAGVSFGLGIGLSALGGVLVVSGLLCLLVKREVSKVCPEEIPAVQPEETPEGVPVTPFEKPALDEAQKEQKTQK  
ILDQLPQELDQLDRYIQEVFACLGPLKDLKYEDQGFLQDVKEEFQVDFVQKDMIAEFVELQQILCQEGRLLLEFVINQTRYIGRDLFKRE  
DSLYKLWEWLGYPSPGDVRGERLKKSAREVVDRFMRTTCNIRKIAMTFDRHVYSVAKTAFEKAFGALET CVYESMRESYREAFCEYEK  
AKLLGDEEKSAHAEQRFQDIKNRWEDVKDAFFWVKEDGKIEIDDAIGNSCKWSERYEEHRITRARWYKVAEHQLFNATMRVKDSLRE  
HNEARVAFEKERSKENQRQVQKKKEKRLRDLKELHDQELPRAQERLRELQALYPEIAVSVVEARREVASDLEKAHESIDKHYQSCVREQ  
ELY

>core/69/1/Org1\_Gene1003

MLLLISGALFTLGIPGLSAAISFGLGIGLSALGGVLMISGLLCLLVKREIPTVRPEEIEGVS LAPSEEPALQAAQKT LAQLPKELDQLDTDI  
QEVFACLRKLDKSKYESRSFLNDAKKELRVDFVVEDTLSEIFELRQIVAQEGWDLNFLINGGRSLMMTAESESLDFHVSKRLGYLPSG  
DVRGEGLKKSAAKEIVARLMSLHCEIHKVAVAFDRNSYAMA EKAFAKALGALEESVYRSLTQSYRDKFLESERAKIPWNGHITWLRDDAK  
SGCAEKKLRDAEERWKKFRKAVFWVEEDGGFDINNLLGDWGTVLDPYRQERMDEITFHELYEKTTLKRLHRKCALAKTTFEKKRSKK  
NLQAVEEANARRLKVVRDWYDQEFQKAGERLEKLHALYPEVSVSIRENKIQETRSNLEKAYEAIEENYRCCVREQEDYWKEEEKREAEF

RErgnkILSPeelessleQFDHGLKNfSEKLMELEGHILKLQKEATAEVENKILSDAESrLEIVFEDVKEMPCRIEEIEKTLRMAELPLLPtk  
KAFekACSQYNSCAEMLEKVKPYCKESLAYVTSKERLVSLDEDLRRAYTECQKRfQGDSGLESEVRACREQLRERIQEFETQGLDLVEKE  
LLCVSSRLRNTECDCVSGVKKEAPPgKKFYAQYYDEIYRVRVQSRWMTMSERLREGVQACNKMLKAGLSEEDKVLKEEEYWLYREER  
KNKEKRLVGTKIVATQQRVAAFESIEVPEIPEAPEEKPSLLDKARSLFTREDHT

>core/76/1/Org1\_Gene708

MGYIESSTFRlyAEVIVGSNINKVLDYGVpenLEHITKGTAVTISLRGGKKVGVIYQIKTTTQCKKILPILGLSDSEIVLPQDLLDLFWISQY  
YFAPLGKTLKLFLPAISSNVIQPKQHyrVVLKQSKAKTKEILAKLEVLHPSQGAVLKILLQHASPPGLSSLMETAKVSQSPIHSLEKLGILDIV  
DAAQLELQEDLLTFFPPAPKDLHPEQQSAIDKIFSSLKTSQFHTHLLFGITSGKTEIYLRATSEALKQGKSTILLVPEIALTvQTVSLFKARF  
GKDVGVLHHKLSDSDKSRTWRQASEGSLRILIGPRsALFCPMKNLGLIIVDEEHDPAYKQTESPPCYHARDVAVMRGKLAHATVVLGs  
ATPSLESYTNALSGKYVLSRLSSRAAAAHpAKISLINMNLEREKSKTKILFSQPVLKKIAERLEVGEQVLIFFNRRGYHTNVsCTVCKHTLKC  
PHCDMVLTFHKYANVLLCHLCNssPKDLPQSCPCLGTMTLQYRGSGTEKIEKILQQIFPQIRTIrIDSdTTKfKGSHEtLLRQFATGKAD  
VLIGTQMIAKGMNFSaVTLAVILNGDSGLYIPDFRASEQVFQLITQVAGRSGRSHLPGEILIQSFLPDHPTIHSAMRQDYSAFYsQEITGR  
ELCEYPPFIRLIRCIFMGKCPKQTwEEAHRVHNILKEQLESTNPLMPVTPCGHfKIKDTFRYQFLIKSAYVIPVNKKLHHALMLAKLSPKV  
KFMIDVDPMtTFF

>core/79/1/Org1\_Gene564

MDYLEKLQVLIIEGQsANFLSLWEEYCFNDVVRGRELVEILEKVKSSSLASLFGKIVDTVVPLWEKIPEGKDKDRVLQLILDlQTSNSQM  
FFDIATEYVNKKYSgeENfNEALRVVGLRDGRDFQfSLSRFDfLMHMHKGNFVFHQGGWGVGEVMGVSFLQQKVLIIEFEGIMSAKD  
ISFETAfKSLTPLSGDHFLSRRFGDPDGFEAFAKENPIEVVEILLRDLGPKTAKEIKDELVDLVIPEADWNRWWQSAKTKIKKGTRIISPDN  
PKEPYVLSdagCSHMGQLERKLGLSLNSAEKISLIYHFIRDLHSELKNIEIRKSLVKALQDLdVEEGNKSLILQRELLSEYLGIKDASIDKEYI  
TSLSEDDTSRLLENMPiVALQKSfSLVRKYSSFWQQVfMQILLYTTsPTMRDFVYKTIKNdPSSVEVLKKRLDSAHQPMMPeLFVW  
FFLKLGNHEDGLFDPEDKEVLRlFLESALNFMYQVASTPHKELGKKLHHYLVGQRYLAVRQMIEGASLPFLKELLLSTKCPQfSSSDLNv  
LQSLAEVVQPTLKKHKSNVEEENVLWSTSESfSRMKAKLQSLVGKEMVDNAKEIEDARSLGDLRENSeyKFALEKRARLQEEIRVLS EEI  
NRARILTKDLVFTDKVGVGCKVTLKGdAGEVVEYtILGPWDADPDSCILSLQSKLAQNMLGKKLNDVVLQgKEYKISRIQSIWEEHGA

>core/82/1/Org1\_Gene205

MIRSPLPFISSKRALNMLGLQDEFSCPEDVVDfLFSIEllaQQDEPSEGYLALSrSLLMMTHNHPKVVKRVIFYGVSyGLKHKsMSIFID  
VLTYIDFLFEKLGISASDRLSLCSARTCINFELYSQTGEMKFLSEVVdNfRLIEQLLKMHPQLKNRLGWEHFRIGAKQEEVSLVASASVYQ  
AVGRSfIELYHKHLESLdACGMKCLALALDLSPNNAHIHAdYAKGLVVLGTRQGKSLliERGMEHFskAIFLSfSRDGDtLAYQNYRYS  
YALASVKLFDLTyKKEHFDQAMNilyQTVQAFPNLSGLWMVWGELLIRSGWLNSNMKYIEVGLEKLASLQKKTNDPIALSGLLATGIAI  
LGLYLEEPNLFKDSRHRLISAMRTfPGNSALVHALGVVQLCSALYFNEDSHfASAIscfQSCLEWDLdATGMWQKLFDAYfSWGIKKK

SARLLRKAVDVASRLCSLRPEAFLWSDRGLALKCLAEATIDEAYKEIFLSESLHYQRAWDLSGRLEILELWGQSHYLLAELQQSLFHYD  
EAYTLTKVDLTLSSSRVKLILAAVLLGKGRLQDTPAEEAREILEPLVEVYLEDENFLLLKGKVVFLFWKNKNVCLGKLARTYLEKATSL  
GCPEAYYTLGKFYAVIKDVNKAWGMVIRSAQYGVRITEAKWLNDPYLANLREIHAFREVVENQKGRLWLGNKTEMKRN

>core/84/1/Org1\_Gene997

MYKRCVLDKILKGIVAGSLILLYWSSDLLERDIKSIKGNVRDIQEDIREISRNVKQQQTSQAIPAAPGVMLAPKLVRDEAFALLFGDPSYP  
NLLSLDPYKQQTLPPELLGTNFHHPHGILRTAHVGKPENLSPFNGFDYVVGFDYDLCLPSLASPHVGKYEESPD LAVKIEEHLVEDGSGDKEF  
HIYLRPNVFWRPIDPKALPKHVQLDEVFQRPHPVTAHDIKFFYDAVMNPYVATMRAVALRSCYEDVVSVSSENDLKLVRWKAHTVI  
NEEGKEERKVLVSFAFNTLSLQPLPRFVYQYFANGEKIIEDENIDTYRTNSIWAQNFTMHWANNYIVSCGAYYFAGMDDEKIVFSRNP  
DFYDPLAALIDKRFVYFKESTDLSLQDFKTGKIDISYLPPNQRDNFYSFMKSSAYNKQVAKGGAVRETVSADRAYTYIGWNCFSLFFQSR  
QVRCAMNMAIDRERIEQLDGGQYTGISGPFASSSPSYNKQIEGWHYSPEEAARLLEEGWIDTDGDGIREKVIDGVTVPFRFRLCYVY  
KSVTAHTIADYVATACKEIGIECSLLGLDMADLSQAFDEKNFDALLMGWCLGIPPEDPRALWHSEGAMEKGSANVVGFFHNEEADKIID  
RLSYEYDLKERNRLYHRFHEIIEEAPYAFLFSRHCSLLYKDYVKNIFVPTHRTDLIPEAQDET VNVMTMVWLEKKEDPCLSTS

>core/92/1/Org1\_Gene351

MYNLLHAHHAASPDGRLVSHLKKLSPHIYEGEVLINIPAYFLGFHLPQQCIQVNLKSSLAQLGVEAVLNHLELNKARKEARLHVLFMS  
QDPIATAMLELLEPGSFVCKLFAADDRRLVRSPCYLNRMFTHDRTGSPLLRFGKKLEHFITLEIINDRLVVFLPILPGTICYEETIYGFLPL  
MSKSLTRPHLKIRKFLPLYQMVTDTRPPVPEDHKILLIKTEPLHIRTVFARVVQDLLPQGLRHTAADILEPTTQESGDIYEFYGSTSEPIERIPL  
EFFTLEPYKEHSFFFYRDMLQETLESPQEVFRVFESIPEGEDQAAMFISKGSSELLELSQDSWIKPRISPSDERHAREIQKHIEDQPCFPFLK  
AMETDHITSQGVLSRYFPSASLKGMFLSNYSRYLQHIYFQIPSPTSGEFFSNRDRSFLDLDFAGISVFWADLESKRLLQYIKRRNKDV  
GMFVPKHQAQEQFAQSYFIGIHGSLIAGDYDEFRELLTGMHTLSQQFTIPEFPQTPLAILTGGGSGAMELANRVATELSILSCGNLISL  
DTTNAYVEAKMSYAIPDLLERQADFHVLDLAVFVIGGMGTDFELLELISLKTGKKALVPVFLIGPVDYWKSKITALYNSNHAVGTIRGSE  
WVHNCLFCLSSAKAGIAIFRRYLNHTLPIGPEHPVPEDGFVIV

>core/93/1/Org1\_Gene763

MKRSRRNFEQALENLEKLKEISLATSNDSYLNNPARFNQRKQTGSSVMEMKEALKNVENYLLEISCVSKSHADKALKESDFLIAGVQNV  
FSFLENQEDLYKSLLDEYSEVTKAYDEVKKNLKEVPTYDLSTDEETEEHKEPECFLNNLVEVKRDRSYELFYMLDEQDKRFYNDALVQIY  
KQKNLHETVNEGDLTKTLLWNSEEVKNIASSLVIVNDMPLRLFYQRALSHLDIEAVVKVHNAVMALFFSRYEATMVFKSPKKHNIWY  
FNDFLLFLREAWKDLNNNVIDSQERKQTKLLASALSLGIFESKLVFEEASRYLYFNIQTKLENANGKKPLSPGQYLTDAYEELHRLISKYPN  
GPLFKAMDRVLEHESRPYDPMILGILPSLEGTCLKHKGSIIRSPSPVTQSSILYANCNEEFLGFLNAKAHRSEVTLVNIQNRISRKERAR  
SRVIEEALEQEEHAPYVHAFSFPEPEELLQNLESIHGDIETFADFFSILQEEFHKPLASSFFLTKEKLFVGSFLKEKLTALKDIFFAKKKILFR  
NDKLLLLHLLSYLIVFKLIERTNPNSIVVVS KDGLDYVSFIAGFAFFSREAFWDEHSLKLLLTNVLSPTLVARDRLVVFVSHIELLSKFNCLK  
KNRQGFSSLSKSFKDDIEGWEFTGYLHELTEVSHKHNL

>core/105/1/Org1\_Gene609

MTFQLHAPFAPCGDQPEAIARLSAGVRNQVKSQVLLGTTGSGKTFTIANVVANVNLPTLVLAHNKTAAQLYQEFREFFPNNAVEYFIS  
YYDYYQPEAYIARSDTYIEKSLINDEIDKLRLSATRSILERRDTLIVSSVSCIYGIGSPENYTSMALVLEVKEYPRNILTAQLVKMHYQASPI  
PQRSFRERGSVIDIFPAYESELALRLEFLNDTLTSIEYSDPLTMIPKESVPSATLYPGSHYVPEAIREQAIRTIQEELEERMAFFDDRPIEKD  
RIFHRTTHDIEMIKEIGFCKGIENYSRHFTGAPPGAPPTCLLDYFPEDFLIIDESHQTLQPQIRAMYRGDQSRKQSLVEYGFRLPSAFDNRP  
LYEEAQKYFRKVIYVSATPGDTEVQESSGHIVQQIIRPTGIPDPMPEIRPATGQVDDLLEEIRLRLSQKHEKILVISITKKLAEDMAGFLSE  
LEIPAAYLHSGIETAERTQILTDLRSGVIDVLIGVNLLREGLDLPEVSLVAILDADKEGFLRSTSSLIQFCGRAARNINGKVIFYADQKTRSIEE  
TLRETRRRRQIQLDYNKEHNIVPKPIIKAIFANPILQTSKDSESPKESQRPLSKEDLEEQIKKYEALMQRAAKEFRFNEAAKYRDAMQACK  
EQLLYLF

>core/107/1/Org1\_Gene306

MSYRKRSTLIVLGVFALYALLVLRYYKIQICEGDHWAAEALGQHEFCVRDPFRRGTFFANTTVRKGDKDLQQPFAVDITKFHLCADPLAI  
PECHRDEIIQGILQFIEGQTYDDLCLKDKKSRYSCKLYPLLDVSVHDRLSLWWKGYATKHRLPTNALFFITDYQRSYPFGKLLGQVLHRTL  
EIKDEKTGKAFPTGGMEAYFNHILEGDVGERKLLRSPNLRLDTNRVIKLPKDGSDIYLTINPVIQTIAEEELERGVLEAKAQGGRLILMNS  
QTGEILALAQYPFFDPTNYKEYFNNKERIEHTKVSFVSDVFEPGSIMKPLTVAIALQANEEASLSQKKIFDPEEPIDVTRTLFPGRKGSPL  
KDISRNSQLNMYMAIQSSNVVYAQLADRIIQSLGVAWYQQKLLALGFGRKTGIELPSEASGLVPSPHRFHINGSLEWSLSTPYSLAMG  
YNILATGIQMVQAYAILANGGYAVRPTLVKKIVSASGEEYHLPTKEKTRLFSEEITREVV RAMRFTTLPGGSGFRASPKHHSSAGKTGTTE  
KMIHGKYDKRRHIASFIGFTPVESSEGNFPPLVMLVSIDDPEYGLRADGTKNYMGGRCAPIFSRVADRTLLYLGLIPDKKLRNCDEEAA  
ALKRLYEEWNRSPKQGGTR

>core/123/1/Org1\_Gene268

MTLITPAINSSRRKTHTVRIGNLYIGSDHSIKTQSMTTTTLTDIDSTVEQIYALAEHNCDIVRVTVQGIKEAQACEKIKERLIALGLNIPLVA  
DIHFFPQAAMLVADFADKVRINPGNYIDKRNMFKGTKIYTEASYAQSLLRLEEFAPLVEKCKRLGKAMRIGVNHGSLSERIMQKYGDT  
IEGMVASAIEYIAVCEKLNVRDVVFSMKSSNPKIMVTAYRQLAKDL DARGWLYPLHLGVTEAGMGVDGIIKS AVGIGTLLAEGLGDTIR  
CSLTGCPTTEIPVCDLRLRHTKIYLDLPEKKNPFSLQHSENFVSAAEKPAKTTLWGDVYGVFLKLYPHHLTDFTPEELLEHLGVNPVTKEK  
AFTTPEGVVVPPELKDAPITDVLREHFLVFHHHQPCLYEHNEEIWDSPAVHQAPFVHFHASDPFIHTSRDFFEKQGHQKPTKLVSFR  
DFDNKEEA AISIATEFGALLDGLGEAVVLDLPNLPQDVLKIAFGTLQNAGVRLVKTEYISCPMCGRTLFDLEEVTTRIRKRTQHLPGLKI  
AIMGCIVNGPGEMADADFGVGSKTGMIDLYVKHTCVKAHIPMEDAEELIRLLQEHGVWKDPEETKLTV

>core/126/1/Org1\_Gene572

MFRCILFGIFLLTCFSSGGVLYYLFCSHDFSIGPKEKSRSVWIEEEKEFTDSVLHHLPSQHQLHLILCFQGFLQKQKFSQAEKIFSKVYDE  
AQDGPFLFKEEILGSRLINSFFLEKTDVMETILCLLNQRCNPSPYYHLFKALVCYKQKLYREVIEQLAYWQEEKTRALAPLLNISIEQLLTDF  
LLDYISAHSLIEQKMFPEGRVILNRNINRLLKHECEWNAKTYDRIAILLSRSYFLELVESKSADIYFDYYEMVLFYLLKKIYILEQCPYAEELLPEE  
ELVSLIMEHVFILPKDKLYPLIQLLEMWQKHVHPNSSLVVQILVDRFSTHMEGAIRFCEALVSFSGLEELHQQIITTFEELLSNKVQQIKT  
EEAKQCVALHILDPSISISEKALSSDTLQNIIVSGDDEQHTKLRNYLDLWEAIQSYDIDRQQLVHHLVYGAKDLWKKGGNDEKALNLLQ  
LVLRFTSYDIECESVVFLFIKQAYKQALSSHAIRLLKLEKFISEANIPSIVISEAEKANFLADAEYLF AHEDYDKCYLYSMWLTKVAPSPQSY  
RLAGLCLMENKRYDEALEFLCMLSPNDSINDYKTQKALAFQCQKHQSKDRAAS

>core/130/1/Org1\_Gene722

MRIEDFSLKLIPSSPGVYLMKDVHDQVLYIGKAKNLKNRLASYFHEKGDSRERIPFLMKKTASIIETIVVSNETEALLENLIKQHHPKYN  
VLLKDDKTFCLAISSLHSPKVEAIRTKAITSSQRQLIFGPYVSAEACHTLLEVISQWFPLRRTCSDREFALRKRPCILYDMKRCLAPCVGY  
CTPEEYQGTLDKAILFLKGKIEEVVKDLEKVIQKASDNLEFEQAANYRTLSLIKQAMAKQQVEKFHFQNI DALGLYRHKQRTILTLLTVR  
SGKLLGARHFSFFENAQEDQDLLSSFILQYYVSQPYIPKEILTPLLEFPTLSYVLNAESPRLRSPKTGYGKELDLAYRNAKAYAATTLPS  
TLPYQDFQNILRMSQYPYRIECYDNAHMQGAHATGVYIVFENNGFDPKQYRTFSIDSEKTQNDLALLEEVLLRRFHSLLTALPDMIVVD  
GGKTHYNKTKKIIQTLNLTGIQVVTIAKEKSNHSRGLNKEKIFCETPPEGFSLPPTS NLLQFFQILRDEAHRFAISKHRKKRGKALFEQEKIP  
GIGEVKRKRLLQFKFSWKQVMLSSQEELEAIPGLTKKDIAVLLARQKDFNKS

>core/138/1/Org1\_Gene723

MYTEESLDNLRHSIDIVDLSEHIHLKRSGATYKACCPFHTEKTPSFIVNPAGAHYHCFGCGAHGDAIGFLMQHLGYSFTEAILVLSKKFQ  
VDLVLQPKDSGYTPPQGLKEELRHINSEATFFRYCLYHLPEARHALQYLYHRGFSPDTIDRFHLGYGPEQSLFLQAMEERKISQEQ LHT  
AGFFGNKWFLFARRIIFPVHDALGHTIGFSARKFLENSQGGKYVNTPETPIFKKSRI LFGFNFSRRRIAKEKKVILVEGQADCLQMIDSGF  
NCTVAAQGTAFTEEHVKELSKLGVLVFLLFDSDEAGNKAALRVGDL CQTAQMSVFVCKLPQGHDPDSFLMQRGSSGLIALLEQSQD  
YLTLFISEKMSSYPKFGPREKALLVEEAI RQIKHWGSPILVYEHKQLASLMMVPEDMVLSLANPQVTAEPQNIPIKQKVPKIHPHIVME  
TDILRCMLFCGSNTKILYTAQFYVPEDFKHPECRKLFAFMISYYEKYRKNVPFDEACQVLSDSQILQLLTKRRLNTEALDTIFVQSLQKM  
ADRRWREQCKPLSLNQNIQDKKLEILEDYVQLRKDRITIITLLDPESELIP

>core/140/1/Org1\_Gene409

MTNSDNAASAAGLLWAHPKEDPAFLGMIIEFHLPPPTVAQIFISRGFQTIQEIHKFLYSHLSSLYDPGLFLDMSKAVERLLLARDRKEHVM  
IYGDSVDGDMTGVALLEFLRDIDVHVSYFFLGAILKQHGETSTLIAKLKEEGITLLITVDCGITAGKEVSDITRQGIDVIITDHHMPTGKIP  
HCVATLNPKL RDHTYPNRELTVGVVAFKLARGVLNALISRNLPK SQGSLKLLDLVLTGTITDVGVLLENRMVMVRYGIKEIARGARPG

LNKLCALCGVEKSEVTSTDIVLKIAPKLNSLGRLLDDPAKGVELLTQDDERVDALIMELDNINRERQRIEAEVFQDVQEILNSNPEILKQA  
AIVLSSTAWHARVIPIISARLAKTYNKPVVIIAIQRGIGKGSARTIGSFPLLGVLLKCCSSLLSYGGHDFAAAGVIMKEDKVEDFKKKFVHLVN  
SSLKKGDTLPHLEIDAYADFDAIDYDLLASMELEFPFGKGNLMPIFYSKVRQVRYPKVLPGNHLKLYLSQKERNLEGVAFGLGRHADALK  
ASWHYPLEIAYTPRLSQTSGSGVIHLLVRDFRISSEPRFSD

>core/141/1/Org1\_Gene240

MSFLRRHISLFRSQQLIDVFAPVSPNLELAEIHRRVIEDQGPALLFHNVIGSSFPVLTNLFGTKHRVDQLFSQAPDNLIARVAHLISSTPK  
LSSLWKSRLDKRISSGLKKARFRRFPFVSMSSVNL DHPLLTSWPEDGGAFLTLPVYTESPTLTTPNLGMYRVQRFNQNTMGLHFQI  
QKGGGMHLYEAEQKKQNLPVSFVLSGNPFLTLSAIAPLPENVSELLFATFLQGAKLLYKKTNDHHPHLLYDAEFILVGESPAKRRPEGP  
FGDHFYGYSLQHDFEFHCHKIYHRKDAIYPATVVGKPYQEDFYIGNKLQEYLSPLFPLVMPGVRRLKSYGESGFHALTAAVVKERYWR  
ESLTTALRILGEGQLSLTKFLMVTDQEVPLDRFSVVLETILERLQPDRLIIFSETANDTLDYTGPSLNKSGSKGIFMGIGKAIRDLPHGYQG  
GKIHGVDIAPFCRGCLVLETSLEDRCIKSLLHHPDLKSWPLIILADNLRETIQSEKDFLWRTFTRCAPANDLHALHSHFATHRPNYNFPF  
VIDALMKPSYPKEVEVDPSTKQKVSRWHAYFPNKETFYI

>core/150/1/Org1\_Gene576

MFMNNTQNSQATEVSSEESQKKLEELVALAKEQGFITYEEINEILPMSFDTPEQIDQVLIFLTGMDIQVLNQIDVERQKEKKKEAKELEG  
LARRTEGTPDDPVRMYLKEMGTVPLLTREEEVEISKRIEKAQVQIERIILFRYSAKEAISIAHYLISGKERFDKIISEKEVEDKTHFLKLLPKLI  
TLLKEEDTYLENLLLSLKQPDLSKQEAAKLNDLSLEKCRIRTQAYLRCFHCRRHNVTEDFGEVVFAYDSFLHLEQQINDLKVRAERNKFAAA  
KLAAAKRKLYKREVAAGRTLEEFKKDVRMLQRWMDKSQEAKKEMVESNLRLVISIAKKYTNRGLSFLDLIQEGNMGLMKAVEKFEYR  
RGYKFSTYATWWIRQAVTRAADQARTIRIPVHMIETINKVLRGAKKLMMETGKEPTPEELAEELGLTPDRVREIYKIAQHPISLQAEVG  
EGSESSFQDFLED TAVESPAEATGYSMLKDKMKEVLKLTDRERFVLIHRFGLLDGPKTLEEVGSFAFNVTRERIRQIEAKALRKMRRPIR  
SKQLRAFLDLLEEEKTGTSKVKSLKSK

>core/151/1/Org1\_Gene901

MDTQSSIGNEEWRIAGTSIVSGMALGKVFFLGTSPLHVRELTLPQEEVEHEIHRYKALNRSKSDIVALEQEV TGQQGLQEVSSILQAHL  
EIMKDPLLTEEVVNTIRKDRKNAEYVFSSVMGKIEESLTAVRGMPSVVDVQDIHDISNRVIGHLCCQHKKSSLGESDQNLIIIFSEELTPSE  
VASANSAYIRGFVSLVGAATSHTAIVSRAKSIPYLANISEELWNI AKRYNGKLV LIDGYRGELIFNPKPATLQSCYKKELS VVAHTSQRLVR  
KSLHPIVSSHAGSDKDVEDLLENFPQTSIGLFRSEFLAVILGRPLTLREQVDLYEKLARFPGDSPSVLR LFD FGEDKPCPGIKNKKERSIRWL  
LDYSVILEDQLQAIKASLQGSIKVLIPGVSDVSEIIEVKKKWETIQTRFPKGHKVSWGTMIEFPSAVWMIEEILPECDFLSIGTNDLVQYT  
LGISRESALPKHLNVTLP PAVIRMIHHVLQAAKQNQVPVSICGEAAGQLSLTPLFIGLVQELSVAMPVINRLRNHIALLELNSCLEITEAL  
LQAKTCSEVEELLNRNNKITS

>core/153/1/Org1\_Gene899

MGLFHLLTFLGLLCSLPISLVAKFPESVGHKILYISTQSTQQALATYLEALDAYGDHDFVLRKIGEDYLKQSIHSSDPQTRKSTVIGAGLAG  
SSEALDVLSQAMETADPLQQLLVLSAVSGHLGKTSDDLKALASPYPVIRLEAAYRLANLKNKTKVIDHLHSFIHKLPEEQCLSAAIFLRLE  
TEESDAYIRDLLAAKKSARSATALQIGEYQQKRFLPTLRNLLTSASPQDQEAILYALGKLKDGQSYNNIKKQLQKPDVDVTLAAAQALIAL  
GKEEDALPVIKKQALEERPRALYALRHLPSEIGIPIALPIFLKTKNSEAKLNVALALLELGCDTPKLLEYITERLVQPHYNETLALSFSKGRTLQ  
NWKRVNIIVPQDPQERERLLSTTRGLEEQILTFLFRLPKEAYLPCYKLLASQKTQLATTASFLSHTSHQEALDLLFQAAKLPGEPIIRAYAD  
LAIYNLTKDPEKKRSLHDYAKKLIQETLLFVDTENQRPHPSMPYLRVQVTPESRTKLMLDILETLATSKSSEDIRLLIQLMTEGDAKNFPVL  
AGLLIKIVE

>core/159/1/Org1\_Gene813

MSSPPQAVASLTERIKTLLESNFCQIIVKGELSNVSLQPSGHLVFGIKDSQAFLNGAFFHFKSKYYDRKPKDGDVAVIIHGKLAVYAPRGQY  
QIVAHALVYAGEGDLQKFEETKRRLTAEGYFATEKKKPLPFAPQCIGVITSPTGAVIQDILRVLSRRARNYKILVYPVTVQGNAAHEISK  
AIEVMNAENLADVLIARGGGSIEDLWAFNEEILVKAIHASTIPVSAVGHETDYTLCDFASDVRAPTPSAAAEIVCKSSEEQVQVFEGYL  
RHLLSHSRQLLTSKKQQLPWRRFLDRAEFYTTAQQQLDSIEIAIQKGVGQKIHESKQRYDNISRWLQGDVSRMTCRLQSLKKMLSQ  
ALSHKALSQVRCHQLKKSILTYPRQIQQASQKLSPWRQQLDITLISRLHYQKEEYFHKHTRLKHAHNVLQQLRSHVQKLELLGRRLSR  
GCELNLQNQKIAYANVKETLATILERRYENSVARYSALKEQLHSLNPKNVLKRGYAMLFDFNENSAMISVDSLQENARVRIQLQDGEAI  
LTVTNIEICKLIKG

>core/160/1/Org1\_Gene973

MDNSDNSFHTLETEQGSFLNDELAVEEVASTESTEISDATLCFADEIQELPSPEKKVAFILNKMREALTGSSQGSDDLRLFWDLRKQCLPL  
FNEIEDTAKRADHWRCYIELTKEGRHLKGLQDEEGSFVVGQIDLAITCLEKDILKFQEGTEDKIFKDREDNFLESQALDKHQAFYKQHHT  
SLLWLSSFSSKIIDLKELINVGMRLKSKFFQRLSNLGNQVFPKRKELIEKVSQTFAEDVDADFVAKYFIGSDKETLKKTVFFLRKEIKNL  
QHAARKLFVSSHVFAETRLKLSKCWDQLKGMEKEIRQEGRRLRVVSAENSKEVRQMLAEVSSLLIEGNDLSKVRKDLEGISKKIRALDLT  
HDDVISLKKEMQQFLDQLREKQDAAEHSYQEQLAKDKQVKKEAARSLAERITTFSKTCSEGNITSESREEWQTLKELLGKMSFLPPPEKI  
SLDNQLNLALQTIVNFFEEQLSSPDSREKLVNMRQVLKQRRERRRQELKDKLEQDKLLGSSGLDFDRAMQYSALVEEDKRALEELDAS  
ILELKQIQQLL

>core/162/1/Org1\_Gene140

MHPLYVDLDTIISYSPPLPKEFQEAASLIAVPDTSHSKPVVPGVKTLPQTYHLPYLKFVQGENVVHTPLKVGVMFSGGPAPGGHNVI  
QGLFNSLKDFHPDSSLVGFVNNGDGLTNNKSIDITEEFLSKFRNSGGFNICIGTGRKKIVTPEAKEACLKTAEALDLDGLVIIGDGSNTAT  
AILAEYFAKRRPKTSIVGVPKTIDGDLQHTFLDLTFGFDATATKFYSSIIISNRDALSCAHYHFIKLMGRSASHIALECALQTHPNIALIGEEI  
AEKNLPLKTIHHKICSVIADRAAMEKYYGVILPEGIIEFIPEIINLITEIESLSEYEDKISRSPESQRLLKSFPAPIIEQILNDRDAHGNVYVSKIS  
VDKLLIHLVSNHLQQYFPNVFPNAISHFLGYEGRSGLPTKFDNTYGYSGLYGAGILVRNHCNGYLSTIESLACPFMKWKLRAIPVVKMFT  
VKQQADGTLQPKIKKYLVDIGSTAFRKFKLYRKIWALEDYSYRFLGPLQIETPPMHSDNFPPLTLLLNHNFWQRHQGCIEIPDTTY

>core/165/1/Org1\_Gene349

MFGSESLRYQLLIQDFAKVSEEGIGLLESKEYSLLQAKLVLRALAQNSSFDDWFRSFKKCQISYPELAHDRDVLEEFGIQVLRGIENPSVT  
VRAVSVLAIGLARDFRLVPLLLQSCNDDSAIVRSLALQVAVNYGSESLKKAIVELARNDDSIHVRITAYQVVALQIEELLPFLRERAENKL  
VDSVERREAWKACLELSSQFLETGVAKDDIDQALFTCEVLRNGMLPETTEIFTELLSVEHPEVQESLLLSALAWSHQLQNHKEFLSKVRH  
VMCTSPFAKVRFQAAAALLHLHGDP LGRDSLVEGLRSPQPLVCEAASAALCSLGIHGVPLAKEHLESLSRKAANLSILLVSRDIERAG  
DVIARYLSNPEMCWAIEYFLWDAQWNLRGDTFPLYSDMIKREIGRKLIRLLAVARYSQAKAVTATFLSGQQAQGWSFFSGMFWEEG  
DVKTSEDLVTDACFAAKLEGALASLCQKKDQASLQRVSQLYNDSRWQDKLAILESVAFSENLDAPVFLDCCHHEAPSLRSAAAGALFS  
IFK

>core/172/1/Org1\_Gene568

MLGKEEEFTCKQKQCLSHFVTNLTSDFALKNLPEVVKGALFSKYRSVLGLRALLKEFLSNEEDGDVCDEAYDFETDVQKAADFYQR  
VLDNFGDDSVGELGGAHLAMENVSILAANKVLEDARIGGSPLEKSTRYVYFDQKVRGEYLYYRDPILMTSAFKDMFLGTCDFLFDTSALI  
PQVRAYFEKLYPKDSKTPASAYATSLRAKVLDCIRGLLPAATLTNLGFFGNRGRFWQNLHKLQGHNLAE LRRLGDES TELMKVIPSFVS  
RAEPHHHHHQAMMQYRRALKEQLKGLAEQATFSEEMSSSPSVQLVYGDPDGIYKVAAGFLFPYSNRSLTDLIDYCKKMPHEDLVQIL  
ESSVSARENRRHKSPRGLECFEGFDILADFGAYRDLQRHRTLQERQLLSTHHGYNFPVELLDTPMEKSYREAMERANETYNEIVQEF  
PEEAQYMVPMAYNIRWFFHVNARALQWICELRSQPQGHQNYRTIATGLVREVVKFNPMYELFFKFVDYSIDLGRNLNQEMRKEPTT

>core/178/1/Org1\_Gene132

MLRFFAVFISTLWLITSGCSPSQSSKGIFVVNMKEMPRSLDPGKTRLIADQTLMRHLYEGLVEEHSQNGEIKPALAESYTISEDGTRYTFK  
IKNILWSNGDPLTAQDFVSSWKEILKEDASSVYLYAFLPIKNARAIFDDTESPENLGVRALDKRHLEIQLETPCAHFLHFLTLPFFPVHETL  
RNYSTSFEEMPITCGAFRPVSLEKGLRLHLEKNPMYHNKSRVKLHKIIVQFISNANTAAILFKHKKLDWQGPPWGEPPIPEISASLHQQD  
QLFSLPGASTTWLLFNIQKKPWNNAKLRKALS LAIDKDM LTKVVYQGLAEPTDHILHPRLYPGTYPERKRQNERILEAQQLFEEALDELQ  
MTREDLEKETLTFTSFYSYGRICQMLREQWKKVLKFTIPIVGQEFFTIQKNFLEGNYS LTVNQWTA AFIDPMSYLMIFANPGGISPYHL  
QDSHFQTLKITQEHHKHLRNQLIIEALDYLEHCHILEPLCHPNLR LIALNKNIKNFNLFVRRTSDFRFIEKL

>core/183/1/Org1\_Gene5

MYQENLRLLERLLYNSVQKSYADRLFSYEKTKMVHDTPLIPWEEDKEKCAEAEKAFLEQQKILLDYGKSIFWLNENDEINLNDPWSWG  
LNTVRTRKVFQEVDSDSERWNHKKVLIQKLEDDYEKLLKESSKESTEANKKLLSDLVDRLEDATKFFLKKQEEVETRVKDLRARYGGTVDP  
KQDTEAKKKVELEASLETFLDSIESELVQCLEDQDIYWKEQDVKDLARTQELEEQDIEAKREEAAEDLRSLNERLKKSKTMLDRAKWHIE  
NAEDSITWWTSQIEMKDMKARLKILKEDITSVLPEIDEIETCLSLEELPLLTRELLTKSYLKFICSETLLKMTSVFENNIYVQEYEVQLQNL  
GFKLQGISQRFQKQDDFANLEEQVALQKKRLRELTQNFEIQGFNFMKEDFKAAAKDLYIRSTAEQKMNFDVPCMELFRRYHEEVNK  
PLLELMYNCADSYRDAKKKCLSLRLDEKELLQKEIKKEEFYQKKQQRHADRSRHTTYQKLRIAEELALELKKKI

>core/184/1/Org1\_Gene996

MVARGLCDFTLPVNERLPIGPFFVPQHTSGAKGKEFAKRNFSISGLDDILKLCILQRRPFALQWDNLSVKSDYEEAGPAIGIRSLEPQV  
SQISPAHGRCLSTLVQWAPILGSEEQLVWLEETMKRLKFPKSLGSKDAVIDDSEMVPVNANPTQEIPAASETVESSPVAPGNTTDTMP  
AASGTTDTTSGVSEAAAAEATVDSTPGTEEEPSFSRLYALVVQNVYPPEPPKEPEVMFTDEEKSILEATRARMELDLNGYLADYELS  
KDEIQKHVPDLPENWRTNWRWUSERLYKFFFKTKKEGLEEIFLNKELGNMILARGLAATQSQARIKVFNSLVAWLLQSFNVGRSCTAKP  
LPTSKLDLFKSEFESKPKNNILTEFLVASDEEILFKGLRVLEPGIEGWYDHPDQAGEIRSVLEGLVQAGRISGYWENQPFGRFVLRGVGER  
RTELVELLESVASGEIMQFFESSDEEGAFIIDNEPSKTAMLKQRFKSCVRTKLVGSGFADESLPRGRFTILV

>core/186/1/Org1\_Gene686

MSEQEKLSNYNADKKLFSGIDKLFQIVKGSYGPKQSLSPTSFFKERGFYAISQTELSNSYENLGVDFAKAMVKNKIHKEHSDGATTGLILLH  
AILQESYAALEKGISTHKLIALSLKQGEKLQEALQQQSWPIKDALKVRNIIFSSLHMPTIADHFYNAFSVVGPEGLISITKERENDKTSMDV  
FQGFKIPAGYASTYFVSDTASRLTRIAHPLILITDRKISMIHSLPLLQEISEQNQHLIIFCEDIDPDVLATLVVNKLQGLLQVTVVTIPQLSTT  
NQELAEDIALFTGTHICPCQEASHVLAPEMVTLGSCLSIEISESQTTLIGGLHIPEVLTALKTRQLAEEIRTTSCLETKKRLIKSTNRLQSSVAIL  
PTDEDNEPLYTLALKIMESALSRGYVPGGGVALFYASLTGTPKDDADENSIAISLLQKACCAPLKLLATNADLDGDAVIAKLSSLGTTSLG  
ISVFSREIEDLIAGGILDSLATTSTILAQAALDTAILVLSSKILILENQYEISTL

>core/187/1/Org1\_Gene736

MENEILLNIESKEIRYAHKNGQLFDLTIERKKVRQLKGNIIYRGRVTNLRNIQSAFINIDERENGFIHISDILENSKKFEQMFDMDVDALP  
EEASEAPLLSSEEAPIEEFLKLDSPVLVQVVKEPIGSKGARLTSNISIPGRYLVLLPNSPHRGVSRKIEDPHMREQLKQLIRSFEMPQDMGL  
ICRTASTTASTEALINEAHDLLLTWKILEKFYSTEQPCLLYSETDILKKAVITCIDKNYKRLIDDYATYQKCKHMLKKYSPDASIKIEYYRDS  
IPMFERFNIEKIDKATRRKIWLSSGGYLFFDKTEAMHTIDVNSGRSTQLESQVEETLVQINLEAAEEIARQLRLRNVGGLVIIDFIDMKSR

KNQRRVLERLKEHMKYDAARCTILSMSEFGLVEMTRQRNRESLMQTLFTLCPYCSGNAIIKTPESVVIEIERDLKKVINHKEHSHLCLVV  
HPEIASYMKQENDDNEMINLAKQLKAKLQINTSDSVHLNHYQFFSLITGESIDL

>core/193/1/Org1\_Gene97

MADILVIGANPTGLILANMLIQHGISVKVIDHRASPEDPSFLDCRKLPVILSCSSLELLHNSEMLGDFIQANHKIFGARYHWKKRTLLFKFS  
QATDSPVPFSLSTTYQSLEQHLIDEFLKRGVIDWSTRPVTLDNSIFIESTKVSQNFENREIYNPKWIIACEADNNLDIRDLVKSQRLAR  
RINREVIFINCDEGEPPFEEDHIHLLPITKNFLNFVFYNPQEKTKQLCLPQGTHSISPKLKQKLLYTYNLVISDENFHIKTSHHAFPPEHGNVL  
FLGSLNNTLLLSYLNGINNTNIHAAFNLAWKLLPVLKKAALKHLVITKEQEDGNILPYISPTTEKRAKKLPFSRFYTPALMYYFLKGCRKFNTT  
GEEYYPHPHQALKYRSSDIKMSPQDKEIHGPGPGMRAIDARLENGSFLDPLKSSKHLIFFKDIPDLKEALQEEYGEWIEICNVKEPRIL  
NLYHANPNLSLFIIRPDRIYGYRTHTFKLHELISYLLRIFASEKTS

>core/200/1/Org1\_Gene621

MAASILSQELLDILPYTLKKHCLLPIEESSEAITIAHATATSVIAQDEVKLLIKKPVRFVLKEESEILQRLQQLYSNREGNVSDMLLTMKEED  
GTTISEEEDLLETTDIPVVRLLNWILKEAIEERASDIHFEPCEDSMRIRYRIDGVLHDRHSPPSHLRSALTTRLKVLAKMDIAEHRLPQDG  
RIKIHIGGQEVDMRVSTVPVIYGERVVLRILDKRNVIDIAGLHMPKGTIELFKDTITAPEGILLVTGPTGSGKTTTLYSVLQELKGPLTNIM  
TIEDPPEYKLPGIAQIAVKPKIGLTFARGLRHLLRQDPDILMVGEIRDQETAETAEIAQAALTGHLVVSTLHTNDAISAIPRLDMGIESYLLSA  
TLVGVAQRLVRTICPYCKVAYTPENQEKSFSLASLGKDEMPLYRGQGCVHCFRSGYKGRQGIYEFLRPNTLFRSEVASNRPHYILRETA  
EQNGFLPILEHGIALAVSGETTLAEVLRVTKRCD

>core/220/1/Org1\_Gene305

MDLKELLHGVQAKIYGKVRPLEVRNLTRDSRCVSVGDIFIAHKGQRYDGNDFAVDALANGAIAIASSLYNPFLSVVQIITPNLEELEAELS  
AKYYEYPSSKLHTIGVTGTNGKTTVTCLIKALLDSYQKPSGLLGITIEHILGEGVIKDGFTTPTPALLQKYLATMVRQNRDAVVMEVSSIGL  
ASGRVAYTNFDTAVLTNITLDHLDHFHGTFFETYVAAKAKLFSLVPPSGMVVINTDSPYASQCIESAKAPVITYGIESAADYRATDIQLSSSG  
TKYTLVYGDQKIACSSSFIGKYNVYNLLAAISTVHASLRCDLEDLLEKIGLCQPPPGRDPVLMGPCPVYIDYAHTPDALDNVLTGLHELLP  
EGGRLIVVFGCGGDRDRSKRKLMAQVVERYGFAVVTSDNPRSEPPEDIVNEICDGFYSKNYFIEIDRKQAITYALSASDRDIVLIAGKGH  
EAYQIFKHQTVAFDDKQTVCEVLASYV

>core/224/1/Org1\_Gene792

MLCATVSGPSFCEAKQQILKSLHLVDIIELRDLINELDDQELHTLITTAQNPILTFRQHKEMSTALWIKLYSLAKLEPKWMDIDVSLPKT  
ALQTIRKSHPKIKLILSYHTDKNEDLDAIYNEMLATPAEYKIVLSPENSSEALNYIKKARLLPKPSTVLCMGTHGLPSRVLSPLISNAMNYA  
AGISAPQVAPGQPKLELLSYNYSKLSEKSHIYGLIGDPVDRSISHLSHNFLLSKLSLNATYIKFPVTIGEVVTFSSAIRDLPFSGLSVTMPLK  
TAIFDHVDALDASAQLCESINTLVFRNQKILGYNTDGEGVAKLLQKNISVNNKHIAIVGAGGAAKAIAATLAMQGANLHIFNRTLSSA  
AALATCCKGKAYPLGSLENFKTIDIIINCLPPEVTFPWRFPPIVMDINTKPHPSPYLERAQKHGSLIIHGYESMFIEQALLQFALWFPDFLTP  
ESCDSEFRNYVKNFMAKV

>core/225/1/Org1\_Gene321

MMSRLRFRLAALGIFFILLVPNSVSAKTIVASDKEKVGVLVYDNSVEAFQQILDCIDHANFYVELCPCMTGGRTLKEMVDHLEARMDLV  
PELCSYIIQPTFTDAEDQKLLKALKERHPNRFFYVFTGCPPSTSILAPNVIEMHIKLSIIDGKYCILGGTNFEFEMCTPGDEVPEKVDNPR  
FVSGVRRPLAFRDQDIMLRSTAFGLQLREEYHKQFAMWDYYAHMWFIDNPEQFAGACPPLTLEQAEETVFPGFDDKHEDLVLDSS  
KIRIVLGGPHDKQPNPVTQEYLKLIQGARSSVKLAHMYFIPKDELLNALVDVSHNHGVHLSLITNGCHELSPAITGPYAWGNRINYFALL  
YGKRYPLWKKWFCEKLKPYERSIYEFWETQLHKKCMIIDDEIFVIGSYNFGKSDAFDYESIVVIESPEVAAKANKVFNKDIGLSIPVS  
HGDIFSWYFHSVHHTLGHQLTYMPA

>core/226/1/Org1\_Gene728

MRIVQVAVEFTPIVKVGGLGDAVASLSKELAKQNDVEVLLPHYPLISKFSSSQVLSEFSFYEFGLKQQASASISYSEGLTLTIITLDSQIELF  
STTSVYSENNVVRFSFAFAAAAAAYLQEADPADIVHLHDWHVGLLAGLLKNPLNPVHISKIVFTIHNFYRGYCYSTQLLAASQIDDFHLSH  
YQLFRDPQTSVLMKGALYCSDYITTSLTYVQEIINDYSDELHDAILARNSVFSGIINGIDEDVWNPKTDPALAVQYDASLLSEPDLFT  
KKEENRAVLYEKLGISSDYFPLICVISRIVEEKGPPEFMKEIILHAMEHSYAFILIGTSQNEVLLNEFRNLQDCLASSPNIRLILDFNDPLARLT  
AAADMICIPSHREACGLTQLIAMRYGTVPVLRKTGGLADTVIPGVNGFTFFDTNNEFRAMLSNAVTTYRQEPDVWNLIESGMLR  
ASGLDAMAKHYVNLYQSLLS

>core/233/1/Org1\_Gene824

MDKSTGVPLSPPHSKESEMIVLGCMLTGVHYLNLAANQLYEEDFYLEHKIIFRVLQDAFKQDKPIDVHLAGEELKRHNQITVIGGPSY  
LITLAEFAGTAAYLEEYVDIIRSKSILRKMISTAKEIEKRALEQPKNVAEALDEAQNSFFKISQSTSVSQYTLVADKLRGLTTTTDKPYLVQL  
QERQELFLQNAQGDNKSFFTGIPTHFIDLDQLIHGFSPSNLMILAAPAMGKTALALNIAENLCFQNRPLIGIFSLEMTVDQLIHRMICS  
RSEVDSKKISIGDLSGHDFQRIVSVINEMQEHTLLIDDQPLKVSDLRARARRMKESYDIQFLIIDYLQLLSGSGTLRATESRQTEISEISRM  
LKTARELNIPILCLSQLSRKVEDRANHRPMMSDLRESGSIEQSDSLVMFLLRREYYDPNDKPGTAEIIAKNRHGSIGSVPLVFEKELAR  
FRNYSAFECIS

>core/234/1/Org1\_Gene566

MKITVNRGLDLSLQGSPKESGFYNKIDPEFVSIDLRFQPLSLKLVQGDVCSGAPIAEYKHPNTYITSHVSGVVTAIRRGNKRSLLD  
VIIKKTGPSTSTEYTYDLQTLRSDLSEIFKENGLFALIKQRPFDIPAIPQTTPRDVFINLADNRPFTPSPKHLALFSSREEGFYVFGVRAI  
AKLFGLRPHIVFRDRLTLPTQELKTIAHLHTVSGPFPSGSPSIHHSVAPITNEKEVVFTLSFQDVLTHGLFLKGRILHEQVTALAGTALKSS  
LRRYVITTKGASFSSLINLNDISDNDTLISGDPLTGRLCKKEEEPFLGFRDHSISVLHNPTKRELFSLRIGFNKPTFTKTYLSGFFKKKRTYTN  
PDTNLHGETRPIIDTDIYDKVMPMRIPVVPLIKAVITKNFDLANELGFLEVCGEDFALPTLIDPSKTEMLTIVKESLIEYAKESGILTPHQD

>core/236/1/Org1\_Gene452

MKEERSSEILPRVKETKKHAYVSMQEKSCVGECAVVAESEEAESVTVTKIAKLQRMGIEELNILARQYGVKNIGSLTKSQVVFIVKAKS  
ERPDELLIGEGVLEVLDPDGFGLRSPTYNYLPSAEDIYVSPAQIRRFDLKKGDTIIGTIRSPKEKEKYFALLKVDKINGSTPDKAKERVLFENL  
TPLYPNQIRVMMEMGKDHLAERVLDTAPIGKGQRGLIVAPPRSGKTIVLQSIHAIAVNNPDIVLIVLLIDERPEEVTDMIRQVRGEVVA  
STFDEQPERHIQVAEMVIEKARRLVEHGNDVVILLDSITRLARAYNTVQPHSGKILTGGVDASALHKPKRFFGAARNIEGGGSLTILATAL  
IDTGSRMDEVIFEEFKGTGNMELVLDRLSDRRTYPADLIKSGTRKEELLYHPSELERVYLFRQAIADLTIDAMHLLGRLKKTNSNAEF  
LLSLKE

>core/245/1/Org1\_Gene417

MQIAQVFGCGRNGEVKVSAGAKNAATKLLVASLLSDQKCTLRNVPDIGDVSLTVELCKSLGAHVSWDKETEVLEIYTPEIQCTRPPTFS  
NVNRIPILLGALLGRCEGVYVPTVGGDAIGERTLNHFHFEGLKQLGVQISSDSSGYAKAPRGLKGNYIHLPPYSGATENLILAAIAHK  
GRTVIKNVALEAEILDVLFLQKAGADITTDNDRTIDIFGTGGLGSVDHTILPDKIEAASFGMAAVVSGGRVFVRNAKQELLIPFLKMLRS  
IGGGFLVSESGIEFFQERPLVGGVVLETDVHPGFLTDWQQPFAVLLSQAQGSVIHETVHENRLGYLHGLQHMGAECQLFHQCLSTKA  
CRYAIGNFPHSAVIHGATPLWASHLVIPDLRAGFAYVMAALIAEGGGSIIENTHLLDRGYTNWVGKLRSLGAKIQIFDMEQEELTTSPTS  
LALRDASL

>core/255/1/Org1\_Gene311

MLTCNECTTWEQFLNYVKTRCSKTAFFENWISPIQVLEETQEKIRLEVPNIFVQNYLLDNYKRDLCFVPLDVHGEPALFVVAEHKKPSA  
PVASQKESNEGISEVFEETKDFELKLNLSYRFDNFIEGSPSNQFVKSAAVGIAGKPGRSYNPLFIHGGVGLGKTHLLHAVGHYVREHHKNL  
RIHCITTEAFINDLVYHLKSKSVDKMKNFYRSLDLLLVDDIQFLQNRQNFEEFCNTFETLINLSKQIVITSDKPPSQLKLSERIIARMEWGL  
VAHVGPIDLETRVAILQHKAQKGLLIPNEMAFYIADHIYGNVRQLEGAINKLTAYCRLFGKSLTETTVRETLKELFRSPTKQKISVETILKS  
VATVFQVKLNDLKGNSRSKDLVLARQIAMYLAKTLITDSLVAIGAAFVKTHSTVLYACKTIEHKLQNDETLKRQVNLCKNHIVG

>core/257/1/Org1\_Gene578

MSEPRFVCLSLGSLGNRFKNLQIARTLLGEQAVLGLRSSVILETEALLPGSPPEWDLPYFNSVLVGETTSLRELLVTIKQIEKVVGRAE  
ESPPWSPRTIDVDILLYGDESFCCDHTTEITPLSNLLSRPFLIALIASLCPYRRFCTQGSPYHNFTFGELAHHLPSPPGMIRRSLSPTMLMG  
VVNVTNDSMSDGGMFLDPEKAVAQAEKLFTEGAAVIDFGAQATNPVKVKQLSVDQEWERLEPVLRLKETWSNRKQYPIISLDTFYP  
EILRAMDIYPIQWINDVSGGSQSMAEVARDCELSLVMNHSSSLPVDPKNILSFSVPIGEQLLSWGEKQLKMFSDVGLNANQVIFDPGI  
GFGKGAAQSLATLYEIAKFKRLGCPILIGHSRKSFLSLFGNHDPKDRDWETVGLSILLQQQGVDYLRVHNVAAHQKALSVAACEACAPI

>core/262/1/Org1\_Gene687

MRAMLLEDWVSLMLSDVSCPKCDKKITGFAIDSQQVQPGDLFFALPGNATDGHQFLKHAATAGAVAAVSHDYQGDSFGLELIRVD  
DTKSALQEAGSNQCNLFQGTLVGITGSVGKTTTKEFSKITLSSYKTHASPKSYNSQLTVPLSLLMAEGDEDVMILEMGVSEPGNMQDL  
LRIVQPEIAVITHINDQHMHFPQGIQEILKEKSYILQKSKLQLLPKDSPPYLDLRSCSPTAEKFSFSFNDPLADFCYKAISGDSVVIQTPEE  
NYCLPIAFSYKPAYTNLLIAVALSWILEVPEEGVIRSLPELKLPPMRFEHSMRNGMQVINDAYNACPEAMIAALDALPLPSDGGKIILIG  
HMAELGRYSEEGHALVAEKAASRGDMIFFIGEKWIPVQSVLKSYSCEVSFFSSAQDVKDILKQVARYGDVILLKGSRALALESLLACF

>core/269/1/Org1\_Gene648

MPRSLSNEQFSVDLEESPGCIVSALVKVSPEVLNKLKQALKKIKKEITLPGFRKGKAPDDVIASRYPTNVRKELGELVTQDAYHALSTVG  
DRRPLSPKAVRSNSITQFDLQEGAKVEFSYEAFFAISDLPWENLSLPQEEAASEISDSIDIEKGLTNIGMFFATKTPVERPSQEGDFISLH  
VSKSNDENASSAAIFENKYFKLSEEEEMTDAFKEKFLGISTGHRVVETITSPEIQSFLRGDTLTFTVNAVIEVSIPEIDDEKARQLQAESLDDL  
KAKLRIQLEKQAKDKQLQKRFSEAEDALAMLVDFELPTSLEERISLITREKLLNARLIQYCSDEELEKRKSELIKEAEEDATKALKLLFLTHKI  
FSDEKLTISREELQYMMDVCSRERFGQQPPKDISNDTLQELVMSARDRLTYSKAIEHVLKKAELLASTPSA

>core/271/1/Org1\_Gene642

MWLVLWALAASLAIALVAKGYRRFVYFRRYAVQVIREVRLSMELKEWALAEQQLLPILKKRSYRRQCLFEYMRILRKMQRFESEKLLA  
EAKKLGLRGPYFFLEIAYKAYRFGAFKECAQAFASVPQDLFEEEDAACYASALVRLGDLDAACSLIEPWISPLSHQETFTVMGHIYFTSKR  
YKDAIDFYNRANALGVCPVEVTYNLAQAYRITSSYAKAGKLFKLLSNPVYKEEALFNIGLCEQKLGRPGKALLIYQSSDLWSRGDALLM  
KYAAMAAMDQRDYVLAEPCWELALRCSTFAKDYKCGLGYGFSLCRLRKYGDAERVYCNLIQNFPECLTACKALAWLCGVGYATLLGS  
EEGLMYAKKAVELDHSCETLELLSACEARCGNFDAAYEIQSFLSSRDTSLQEKQRRSQILRILRKKLPLNDHHIVEVDALLAA

>core/272/1/Org1\_Gene449

MIENDFPEASNFESSHFYRDKVGVILCGGEGKRLSPLTNCRCCKPTVSFGGRYKLIDIPISHAISAGFSKIFVIGQYLTYTLLQQHLFKTYFYH  
GVLQDQIHLLAPEARQGDQIWYQGTADAIKRNLLYFEDTEIEYFLILSGDQLYNMDFRSIVDTAIRTHVDMVLVAQPIPEKDAYRMGVL  
DIDSEGKLIDFYEKPQEKEVLKRFQLSSEDRIHKLTEDSGDFLGSMGIYLFRRDSLFSLLREEEGNDFGKHLIQAQMKRGQVQTLLYNGY  
WADIGTIESYYEANIALTQKPHA EKRLNCYDDNGMIYSKNHHLPGAITDSMISSLLCEGCVINTSHVSRSVLGIRSKIGENSVVDQSII  
MGNARYGSPSPSLGIGKDCEIRKAIIDENCCIGNGVKLQNLKGYIKYDSPDKKLFVRDNIIVPQGTHIPDNYIF

>core/274/1/Org1\_Gene588

MFQQKQKLSLKYLP SLRMQQGLQMLQSPLTELSSYVVQEIIDNPFFDLSSLEEEEWSPCYRPTNSTFSYLNQTPGPQESLYTRLLPQIEE  
AFSTAEERFIAHQIAGNLSDEGLFLRNPEDFAQELELPLEKIHKVWDTIQNLSPEGIASPSLQSYWMKLLRNSSHQQAYSIVRDCYPLMT  
NCEFAPIMKKFSLSLSELRNILKKALGSIPWCPAAACTVKPMVSTPLPDIYLFYSSGSWKIEVSTRGLPSIKLNKETFFHYEHLPKKEEQKNLY  
QQILSAKWLIKNLKREQTLLQVMETLLPKQEDFLLGKIPAPYPLGIKDLAEDLSFHSTIFRAIENKAVAAPIGIFPLKHLFPRGIHQDSSH  
SKENVLQWIRQWIATEQTPLSDSVISDRITAKGIPCARRTVAKYRAQLKILPANKRKKLFYIRSSNSHFRDRQF

>core/279/1/Org1\_Gene506

MKRPFPTYLCIIFYGSCASLSLHAGLSFPEVRGATAAVVHADSGKVIFYDKDIDAVIYPASMTKIATALFILKHYPTVLDTLIKVKQDAIASIT  
PQAKKQSGYRSPPHWLETDGSTIQLHLREELLGWDLFHALLVCSANDAANVLAMACCGSVEKFMKDLNFFLKEEIGCTHTHFNNPHG  
LHHPNHYTTTRDLISIMRCALKEPPFRGVISTTSYKIGATNLHGERILSPTNKLLLPGSTYHYPPALGGKTGTTKTAGKNLIMAAEKNRLL  
VTIATGYSGPVSDLYQDVIALCETVFNEPLLKELVPPSDCLQLEIANLGKLSCLPEGLYYDFYASEDREPLSVSFIAHADAFPIEQGDLLG  
HWVFYDDEGKKISSQPFYAPCRFERTIKPWKLYMKRVFTSYRTYMSITMLLMYFRIRKHKRYKNLKHYSKI

>core/281/1/Org1\_Gene133

MFSRWITLFLLFISLTGCSYSSKHKQSLIPIHDDPVAFSPEQAKRAMDLSIAQLLFDGLTRETHRESNDLELAIASRYTVSEDFCSYTFFIK  
DSALWSDGTPITSEDIRNAWEYAQENSPHIQIFQGLNFSTPSSNAITHLDSNPDPFKLLAFPAFAIFKPENPKLFGPYTLVEYFPGHNI  
HLKKNPNYYDYHCVSINSIKLLIIPDIYTAIHLLNRGKVDWVGQPWHQGIPWELHKQSQYHYTYTPVEGAFWLCLNTKSPHLNDLQNR  
HRLATCIDKRSIIEEALQGTQQPAETLSRGAPQPNQYKKQKPLTPQEKLVLTYPSDILRCQRIAEILKEQWKAAGIDLILEGLEVHLFVNKR  
KVQDYAIATQTGVAYYPGANLISEEDKLLQNFEIPIYYLSYDYLTDQDFIEGVIYNASGAVDLKYTYFP

>core/282/1/Org1\_Gene229

MNKNLVAIFDYMEKEKGIQRSTIIGAIESALKIAAKKTLRDDANISVNINSRTGDIEVFCEKEIVEICQNPSKEIPLDKAREYDPDCQIGQY  
MDVPFVSDNFGRIAHAARQIIGQKLRHAERDVIYEEYRHRVNETLSGVVKRFAKGSNLIIDLKGVEAILPTRFYFYPKTEKHKIGDKIYALLY  
EVQSENGGAEVILSRSHAEFVKQLFIQEVPELEEGSVEIVKIAREAGYRTKLAVRSSDPKTDVPVGAFVGMGRGSRVKNIIRELNDEKIDIV  
NYSVPSTELLQNLLYPYIEIQKIAILEDKVIIVVNDADYATVIGKRGINARLISHILDYELEVQRMSEYNKLEIQRLQLAEFDSPHLDQPLE  
MEGISKLVIQNLEHAGYDTIRRVLLASANDLASVPGISLELAYKILEQVSKYGESKVDKPEIED

>core/290/1/Org1\_Gene742

MVCENNILSGRGLELLKKKSNITLTPTIYSVSNHNIKLDKDFSPHALSVIKTLRKAGYIAYIVGGCIRDLLLNTTPKDFDISTSAKP EEIKAIFKN  
CILVGKRFRLAHIRFSKQIIEVSTFRSGSTDEDVLITKDNLWGTPEEDVLRDFTINGLFYDPEHEEIIDYTGGVNDLRNRYLRTIGDPFTRF  
KQDPVRMLRLLKILSRSPFTVETQTQEALICRQELIKSSQARVFEELIKMLNSGAAKNFFQLLIENHLEILFPYMDKAFRLNRALEEQTA  
TYLKALDDKILKKEAEYDRHQLMAIFLPLVNFNVRYKHQKHPYLSLTSVFDYIKNFLEQFFADSFTSCSKNFILTALILQMQRILTPLIPT  
KKALFFNKLLHHTRFLEALSLEIRSIVYPKLDKVVYVAWIRHHQTLKCKKDSHSQK

>core/295/1/Org1\_Gene909

MKKT MVIDTSVFIYDPEALFSFENTRIIPFPVIEELEAFGKFRDESAKNASRALSNIRLLENAKTKVTDGVLLPSGSELRIEVAPLSNDDRR  
GKLLTLELLKIIAKREPMVFVTKSLGRRVRAEALQIESRDYESKRFSFRSLYRGFRELQVSQEDIENFYKNGYLDPLDVVPSPNEYFFMSA  
GENHFALGRYYVSEGKIIALKAMDKSVWGKPLNTEQRCALDLLRDDVKLVTLIGQAGSGKTILALAAAMHKVFDKETYNKVLVSRPIV  
PMGRDIGFLPGLKEDKLMHWMQPIYDNMEVLFSINQMGNSSALQALMDAKKLEMEALTYIRGRSLPKAFIIIDEAQNLTPHEIKTIIS  
RAGKGTKIVLTGDPTQIDSLYFDENSNGLTYLVGKFHHLALYGHMFMTTRTERSELAAAAATIL

>core/305/1/Org1\_Gene60

MIKFLSQLFIRHWPRKVVSLSGFIIWILVGQSVTITRTLTVNPPVRIVDLHPDQTVLGLQKSGFLNKKVSLTITGNKNTVQDLRPSNLEVVI  
SAANHTESWIATIDKHNLSVDHEINIRKDIHSVDANDIFVRLTQYVTEDILLTITKPIGSPPKGYEYLDVWP KYLNQKVSGPKEYINALKE  
QGLELTFNLNKISFEELERNRIAQGSHEIIFPIPKEWKKILIPFENTFMDLNDPQADFLRLFLKRECIPLNLNLPVFLFFPVTFIQTMNPLE  
YSLDPVPPIILNHGIHQINIPLYVKDVSQFLDVVKNNMVLTIMPSPQDPSSINWAIEFLDEKTLNTFLQTIIAQEHGILHDIALIDEAGI  
RHRFREYLRKLALFTADGEPLNLIAEIKNNKVVIQTKTKETTKLYKKEW

>core/307/1/Org1\_Gene146

MSSAIARDCFPSPSPQPSSTLGVHPPKYKSLILSVSLIVLGVLLLCVGMILLVNNAIFSFSVLTVGLGGAGVFLGSLLLLGLIFFVSYHRKLSEA  
TRSLEQKITLEYQPWADLRKELNEVQEWSNFLDEWEDFKEVVAQHKSQFATFEGDLLFGREVEKYETIWKELDGRDVALLTELKNI  
WGPLEFLRKKGDRLQCEIDKLRKEVMKVGKSGKLACELTKFKSALKDVKIEQECYRDKRKVEKLEVFPEGYRRELLEVLKTRLSVEKEIQL  
FEEVVSAAFEELASLHRTVFSEELQEALDKAKAELDIQVRKSVVEDLSCEPTLIQYHLLRLYEYVQCRIVEQFLTQTFSSSEQEKVLEEYAL  
KARIRKTLRVKLDQVRANVAFVASTDILLSESESLDGNDSVFEDAHDFFLD

>core/309/1/Org1\_Gene668

MIETREEVGSANFVSLERAIEDLRAGKFVIVVDEASREDEGLIAGEKITVEKMTFLLQHTTGVVCAALSQERLLSLDLPPMVKDNRCRF  
KTPFTVSVDAAHGVTTGVSAADRTKVQQLADPKSKPEDFISPGHFFPLASSPGGVLRAGHTESTVDLMELAGLQPCGVLAELVNED  
YSMMRLPQILEFARKHNIVIPVTSIIAHRMLSDRLVSKISSARLPTIYGDFTHVYESLLEGMQHLALVKGNVAGKSNVLRVHSECVTG  
DILGSKRCDCEQLSSAMSIAEKGTVLVYLRGQEGRGIGLGHKVRAYALQDNGYDITVDANLAMGFPVDSREYGIGAQLVDLKLTTI  
KLITHNPQKYFGLQGFGLSITERVPLPVRISEDNEQYLRTKQERMGHWLDLPCCNNRVQ

>core/312/1/Org1\_Gene689

MCQRILILGTGITGKSVARFLYQQGHYLIGADNSLESLSVDHLHLDRLMGASEFPENIDLVRSPGIKPYHPWVEQAVSLKIPVVTDIQV  
ALKTPEFQRYPSFGITGSNGKTTTTLFLTHLLNTLGIPAIAMGNIGLPILDHMGQPGVRVVEISSFQLATQEEHIPALSGSVFLNFSRNHLD  
YHRNLDAYFDAKLRIQKCLRQDKTFWVWEECSLGNSYQIYSEEIEILDKGDALKPIYLHNRDNYCAAYALANEVGWVSPEGFLKAIRTF  
EKPAHRLEYLGKKDGVHYINDSKATTVTAVEKALMAVGKDVIVILGGKDKGGDFPALASVLSQTTKHVIAMGECRQTIADALSEKIPLTL  
SKDLQEAVSIAQTIAQEGDTVLLSPGCASFDQFQSFKERGAYFKLLIREMQAVR

>core/318/1/Org1\_Gene874

MKKNASHKTNDKKSLSIWSIGGSIFAMFFGAGNIVFPLALGYHYNAHPWSAYFGMMLTAVCVPLLGLVSM LFYSGDYQKFFFSIGRIP  
GMIFITAIILLIGPFGGIPRAIAVSHATLISLSEHKSAFIPSLPIFSAICCVLIYFCKLSRLIQWLGSVFFPIMLVTLWVVIIRSFMIPTHPMVQ  
EFIPNARQAWLAGFIEGFNTMDLLAAFFFCIVLISLRQLVAEEKHPTEEEEPLSFQGISKKNKRSLALGFFLAAILLGMTYLG FVLSAARHA  
GLLVNVSKGHILGRISAIALGPNSILAGVSVFIACLTTEIALVGIVADFLARVVSFKKLNYSASAVICTLIPTYLISILNFETISHLLLPLLQLSYPAL  
IVLACGNIAYKLWNFRYSPVLFYLTLSLTIVLKLVN

>core/322/1/Org1\_Gene751

MNLPVSLACLLLSGCVFFLGVFVSSSLYARKKRAFLEKIQKLEHENQLLQTSNLNLSRHQEQIIEFDSNRLALSSHKLIKDMKEEAQNYFGD  
TSKSFQSILSPIQTTLTTFKQSLETFETKHAEDRGRLKEQISQLLAVEKKLEHETHVLTDLKHHPGSRGRWGEIQLERILELAGMLKYCDYDS  
QTTSAQGAFRADIIIRLPQDRCLIIDAKAPISDSYFSVEEIDKGDLDVKIKEHIKTLKSKSYWEKFHQSPYVILFLPGESLFNDAILAPELM  
EIGASSNVILSSPLTLLALLKTIAYMWKQENLQKQIQEVSLLGKELHRRRLQVVFTHFQKIGKNLNQTVQSYNDMTSSFQYRVLPTRLRFE  
GLETSSSHQIEEPTPIESLATSFPHTCDIDTNLAVIESLEKQD

>core/323/1/Org1\_Gene828

MKTAFHSCYSWFCWLFSLVLFVGGIAGGEPLCPDCKYETKSVLRSDQLPDHLWNYENDCYLTGYVQSLLDMHFLDSRTQVVIEKNRA  
YLFSLPVDSSLSEAITNFVRDLPPFICAVEICERPYGECITRSSAERPLLPEKTLGMPIFCGKEGVWLPQNTILFSPLIADPRQVTNSAGIRFN  
EKVVGNRVGATIFGGDFILLRLFDVSRFHVDCDFGIQGGVFSVFDLDHPESCMVNSDFFVAGLWSGAIDKWSFRFLWHLSSHLGDEF  
ILTHPNFPRFNLSDEGVDLFISFRYTPQIRLYGGCGYIVSRDLTFPERPFYCEWGAELRPFGLREGNLHAQPIFAMHFRCWEEQKFGLDQ  
SYILGMEWAKFQEIGRKIRAVLEYHQGFSKEGQFIREPCNYYGFRITYGF

>core/326/1/Org1\_Gene145

MVVVALFILGIFFLSGSLAFLVHTSCGVLLGAALPILCIGLVLLAVALIVFLCHKHKTRQDLDDYDQDLDSLVIHKKEIPNDISELRTFEKLQ  
NLFQFHTKDFSDLSQELQGKFINCMEKWLTLEDEVTKFLIVRDRFLETRRNFTTFGEQVKGIQSNIFDLHEEKSSLYLELYRLRKDLQVLL  
NFFLLPPGILKVDYDEIEAIKGLFIRLTSRLDKLDVKAQERKKFINEMSREFKEVEKAFDIVDRATKKLMDRAKKESPARLFMGRTESLLEM  
KKNEEALKNQGLDPENLSHPELSPYQQLLILNYLNSEIVLHHYEFISGTVTSGLTLEECENRMRAASTGLNALLVRKLQFRGAIKSAYFE  
KLTEIEKELRSLQDVIKSLELELIHKIKDIVTEET

>core/336/1/Org1\_Gene359

MLSVTIVLVGLEMARSKVSKRDSKILDILFATTELYLKTGQPVGSKTLKESFCSDLSTATIRNYFAELEAEGFLKKNHTSGGRIPTDLALRHY  
VDHQEECPAEISAPIFDKISQLPSESERNIIKDLQKATELLGEILDLPFFSSPRFENDSVTNIQITQVDKQRAVTILSTEFQQIFTDTLWLPE  
ACDTLSIKRIEFLQNYIRKLPTNEELSKKEEHLMSLYNEVVVRYLTRYCNFSEEDLYQTGMSKLLKYEAFKDPEVLALGLSLFENRRQMC  
ELLNIGMHKGRATAFIGKELSDILGTSNPGCSVITIPYYMNRSPLGALGILGPINLPYKEALPLLKLFANKINETLTQSFKFKLSFRRPLTSN  
CKLSNEPILRTEYSSIKLLPSKETL

>core/337/1/Org1\_Gene354

MRRNPHFSLLKPQYLFSEISKLAQFRKENPEISVIDLSIGD TTQPLCRSITQAIKEFCVSQEKQETYRGYGPETGLEKLRTKIAS E VYENRIS  
PEEIFISDGAKPDIFRLFSFFGSEKTLGLQDPVYPAYRDIAHITGIRDIIPLACRKETGFIPELPNQSLDILCLCYPNNPTGTVLTFQQLQAL  
VNYANQHGTVLIFDAAYSASFVSDPSLPKSIFEIPEAKYCAIEINSFSKSLGFTGMRLAWNVIPKELTYDNNNEPMINDWKRLFATTFN GAS  
LLMQEAGYYGLDLFPTPPAISLYLTNAQKLKKSLETAGFSVHGGDHAPYLWVELPEGISDEEAFDFFLHQYHIAVTPGHGFGSCGQGFV  
RFSALTQPQNIALACDRLCTASLKETMVLA

>core/345/1/Org1\_Gene16

MDYYSILGISKTASAEIKKAYRKLA VKYHPDKNPGDAAAEKRFKEVSEAYEVLSDPQKRDSYDRFGKDGPFAGAGGFGGAGGMGNM  
EDALRTFMGAFGGEGFGGGSFFDGLFGGLGEAFGM RSDPAGARQGASKKVHINLTFEAAHGV E KELVVSGYKSCETCSGQGAVNPQ  
GIKSCERCKGSGQVVQSRGFFSMAS TCPECGGEGRIITDPCSSCRGQGRVKDKRSVHVHIPAGVDSGMRLKMEGYGDAGQNGAPSG  
DLYVFIDVESHPVFERRGDDLILELP IGFVDAALGMKKEIPTLLKTEGSCRLTVPEGIQSGTILKVRNQGFNPVHGKGRGDLLVRISVETPQ  
NLSEEQKELLRTFASTEKAENFPKKRSFLDKIKGFFSDFTV

>core/350/1/Org1\_Gene992

MMKQGVGQDAKELYTFLSRGNEHYQ PCLWFSLEEEELGFLF DAKMLCAPLSE DHYCHSYLVDLVDQHLKD LILSMFLDPQNI SAGELLK  
VSINVGDSFSPLQQKDFLSMVL RDETGNV VVVVFKGVLSLPATQVCKLVEELNSKDYSYLNIFSCHGDSSPQLLFRKELEGTSGRYFTVIC  
ALYLGD TDMRSLQLASERIMVSREFDLV DAYAARCKLLKIDHTNWRPGTFSRHAD FADAVDVSAGFNSREFKLITQANQGILESGELPL  
PSKTFWEGFLAFCDRVTVTRHFIPMLDAAIKQAVWTHKHPSLIDKECEALDLKTQCLPSIVSYLEYVTNSHEKTSKGPFIQKEI IADCSPLK  
EALFPGSDEDVPSTSEDP SDDHPSDLEDS

>core/351/1/Org1\_Gene509

MGTPISGNDGDRNTISDPLEESAAEEGDS DLED RVSESATQVIETIADTGIPEATPSEG TNSDLNSDLVDRVEYEARGSLTTMLARIRKA  
VSQIWMHVKTKRHPKEQGVRS LGDIPCDLLKATRLPKETAEP PFYFALETALASCRSFFFHVFLRLFTLLRRQHPEAPLDLCGTDPI SPEA  
AVAFALILRSCCKWVATDAVQEGLPLEVIEEAGMYNAFSL EATTTVEEVSKRSEL LYS DKRIDGLANVRGITKIITSPYLGAGQCVSVVD  
NLKTYDLGRNYTQVLACASQIDEFADKGENEALVMKDILYLVRQDRSKELGDFLMMWSEEHASEVNYDVVLAILEVNLPILEEDYRSH  
PLAYQKKLNYVICQFFCSERLTSIEPKD

>core/353/1/Org1\_Gene431

MAIKNILVVDDEPLLRDFLSELLTSQGFIPDTAENLRNALQMIRSRDYDLVISDMSMPDGSGLDLIKQSSPHTPVLVVTAYGSIENAV  
EAMHQGAFNYLTKPFSSSEALFAFISKAEEELKNLVHENLFLHSQTTPDSSHPLIAESKAMKDLLAIAKKAASSSANIFIHGESGCGKEVLSFFI  
HHNSPRANHPYIKVNCAAIPTLLESELFGEKGAF TGATTKKAGRFELAHKGTLLLDEITEVPVNLQAKLLRAIQEKEIEHLGGTKTLSVD  
VRILATSNRKLKEAIDDKSFRQDLYYRLNVIPLHLPPLRDRQDDILPLANYFLNKFCRMNNTPLKTLSPKAQELLNYPWPGNIRELSNVL  
ERVVILENTSLLTEDMLALA

>core/357/1/Org1\_Gene660

MEKPQNRKAPRIFWLNNQVAIPPSERVKESYALHSDIFSLPPGSALKLAEKTEESIRQLVGLKDSHIFRVPHPHVVHIVLAALVENLSM  
FQGRNHIIIPAHDDQQLLINSRCRHQGLGTTYDWVTVNHEGRIVEEQLIETLSPRSLLFSLSAAHGLTGVIQPLDPLLSLCKDRRILLHLDIS  
DILGRAPLTPEILNADIITFSSAALGGMGSIGGIFIRKSLERVFSSWFPHTSASLCFSAVAAMQTACEERISALPLFTFHTSNLCKKLIQELQ  
SVLPSIQLAFSEVQNRLPNIVVAAIPDIPAESLAFHLHQGGIYPSLGYERFQPLAQVLQNCGISPFLCHSALHFSALTERSKDLEFSKLARAM  
HDAIKHLTPLLGSSS

>core/366/1/Org1\_Gene924

MKHLAVLGSTGSIGRQTLEIVRRYPSEFKIISMASYGNNLRLFFQQLEEFAPLAAAVYNEEVYNEACQRFPHMQFFLGQEGTLQLCIMD  
TVTTVVAASSGIEALPAILESMKKGKALALANKEILVCAGELVSKTAKENGIVLPIDSEHNALYQCLEGRITIEGIKKILTASGGPLLNSLE  
ELSCVTQDVLNHPiWNMGSKVTVDSSTLVNKGLEIEAYWLFLENIEILAVIHPQSLIHGMVEFLDGSVISIMNPPDMLFPIQYALTAP  
ERFASPRDGMDFSKKQTLFFPVDDEERFPSIRLAQQVLEKQGSSGSFFNAANEVLVRRFLCEEISWCDILRKLTTLMECHKVYACHSLED  
ILEVDGEARALAEI

>core/370/1/Org1\_Gene92

MNTSLKRPLKSHFDVVGSLRPEHLKKTRESLKEGSISLDQLMQIEDIAIQDLIKKQKAAGLSFITDGEFRRATWHYDFMWGFHGVGH  
HRATEGVFFDGERAMIDDTYLTDKISVSHHPFVDHFKFVKALEDEFTTAKQTLPAQAFLKQMIFPNNIEVTRKFYPTNQELIEDIVAGY  
RKVIRDLYDAGCRYLQLDDCTRGGLVDPRVCSWYGIDEKGLQDLIQYLLINNLVIADRPDDLVLVNLHVCRGNYSKFFASGSYDFIAK  
PLFEQTNVDGYYLEFDHERSGDFSPLTFISGEKTVCGLVTSKTPTLENKDEVIARIHQAADYPLERLSLSPQCGFASCEIGNKLTEEEQW  
AKVALVKEISEEVWK

>core/371/1/Org1\_Gene465

MSDNAHNLLYDKFELPEAVKMLPVEGLPIDKHARFIAEPLERGMGHTLGNALRRALLIGLEAPAIISFAMTGVLHEYMAIEGVIEDVTNI  
ILNLKGALLKKYPMQDSSLGRTTQVLKASISIDASDLAAANGQKEVTLQDLLQEGDFAVNPQVIFTVTQPIQLEVVLRIFAQGRGYTPS  
ERIVLEDKGVYEIVLDAAFSPVTLVNYFVEDTRVGQDQDFDRLVLIVETDGRVTPKEALAFSTQILTKHFSIFENMDEKKIVFEEAISIEKEN  
KDDILHKLILGINEIELSVRSTNCLSNANIETIGELVIMPEPRLLQFRNFGKKSLEIKNKLKEMKLELGMDLTQFGVGLDNVKEKMKWYA  
EKIRAKNTKG

>core/377/1/Org1\_Gene532

MAVAADSSASWLKSRNNFLSSLGKTEEQVAAPEFPKELCQHKIREKFRLEDVQVSIKFRGSITAVEATKEFGVHLLIQPMVVQPWEVEN  
LLFLTSEEDLQELMVAVFDDASLASIFYEKDKLLGFHYFVAEACKLFEELQWVPSLSAKVGGDAIFTATSLQGSFQVVDISLRDGNV  
RCRLLLPEDTFQSCQKFFSGLHDESDLHNIDQTQQISLSVEVGYSQLTQEEWHQVVPGSFIMLDSCLYDPETEESGALLTVQKHQFFGG  
RFLTPSSGEFKITSYPNLTHEDPPLPENPQASAAPLPGYSRLVVEVARYSLAVSEFIKLNLSILSLGNHPAYGVDIILDGAKVGRGEIIALG  
DVLGIRVLEV

>core/380/1/Org1\_Gene891

MMLVYCFDPSVPTSPEHRLMAALDRWFFLGGHRVRILTLEGNHYRAFQENMSISTVEKILKLISYLLIPIVLIALLIRCFLHSRFGKNWKCD  
SLSDARVPHDVQPFNDFQLFNNQERLNIWKNRRYVSGIDVLMVPVDYLRQFPGFKEIPEAIRCENYVSDGQFSEESKTSYLRAMLTDI  
VGYLSDLDETYWTNVILKIRAMCITFESFPGKEADPNYSRVTTHYFDESWKALARHVLGEGNMVNRLDEALIRTEKPGKEGECITKQFL  
KDYCKKHLEVMSCPDFIESLVDEKIREFRCP SILNSAVCDVIDRKCQEHLKAIINEANRRLPGMKNSSFTMRGNQVLFYTIFSPPKLPPA  
ASSVYF

>core/381/1/Org1\_Gene370

MTTCLPQPPKTSPLYSIFEKLDAQERLSSDALHLLLLTNKEDQRTLWNFADQVRKQRVGDTVYYSSTLYLYPTNFCDFSCFKCSFYAKP  
GDPKGWLYSPD DLLQQIQNIKTPIEVHIVGGCFPSCNLQYSDLFTKIKEYDPQIHIKALTAIEYAYLSDLDNLSIRDVLLTLKDAGLDSIP  
GGGAELVDKIRNFLAPKRLSSSDFLNIHKMAHQLGIHSNITMLCYHKEGPEDLVTHMVKVRDLQDETQGFKNFILLKFAQENNVLGKR  
LRKSGQGHAIPKSLMAVARIFLDNFSNMKALWNYLGIEAALDLLSCGANDLSSTHMGEKVFQMASSKEPIKMDAEGMAALITQQG  
RTPCLTNSSHV

>core/385/1/Org1\_Gene34

MAVEGRVNSSQALNQDCQEVLANKQSKGLLRCRILSIVVAVITFIAGVVLIALTASILTSVPYLALGVFLLIVTLGCIIFALCSEKIKKVPPTP  
ISHKEEIIAWFEERKNIDMEKEKEDPEHFGRTATDIPMRSALDQFNHSCHHIHESPALTETYSHQDVLLFKDWCPVTLPDVTSEEEVLI  
RSVVGSYLLMEACVPKVSMLIDELHNKLSKSPSERECLFIDKKTQKASFLFTQKDLATFFLAYTRVNDGHLAPFRAGAKWILIHVRLRR  
QHNQNDFFTPGHSCYYARLAFNQTRQRLYHQLFNVEKLRSIYANMDKDPLCHPWAFIPIYDLLKTEDHGDGFLEQQEDREYPSRAAQD  
QFWG

>core/387/1/Org1\_Gene888

MKFVVSRLNELGNLIKKIQSVVPQNTPIPVLTHTVLIETYNDELVFTATDLTVSTRCVTKAKVYEKGAISIPSKRFFQLVKELTEANLEISSAG  
EMAQITSGSSCFRLLSMEKEDFPMLPDIQNALRFSLPAEQLKTMQRTSFAVSREESRYVLTGVLLAIANGVATIVGTDGKRLAKIDAEV  
TLDKSFSGEYIPIKAVEEIIKMCSDGEATIFLDQDKIAVECDNTLLITKLSGEFPDFSPVISTESNVKLDLHREELITLLKQVALFTNESSHS  
VKFSFLPGELTLTANCTKVGEGKVSMAVNYSGELLEIAFNPFFFLDILKHSKDELVSLGISDSYNPGIITDSASGLFVIMPMRLHDD

>core/396/1/Org1\_Gene810

MKLYQTLRGIVLVSTGCIFLGMHGGYAAEVPVTSSGYENLLESKEQDPSGLAIHDRILFKVDEENVVTALDVIHKLNLLFYNSYPHLIDSF  
PARSQYYTAMWPVVLESVIDEFLMVADAKAKRIATDPTAVNQEIEMFGRDLSPLYAHFEMSPNDIFNVIDRTLTAQRVMGMMVRS  
KVMLKVTPGKIREYYRKLKEEASRKVIWKYRVLTIKANTESLASQIADKVRARLNEAKTWDKDRLTALVISQGGQLVCSEEFSSRENSELSQ  
SHKQELDLIGYPKELCGLPKAHKSGYKLYMLLDKTSGSIEPLDVMESEKIKQHLFALEAESVEKQYKDRLRKRYGYDASMIAKLLSEEAPPLF  
SLL

>core/397/1/Org1\_Gene437

MAFKRKTRWLWQVLILSVGLNMLFLLFYSAIFRKDIYKLHLFSGPLIAKSSRKVYLSDFLNEISQASLDDLISLFKDERYMYGRPIKLWA  
LSVAIASHHIDITPVLSKPLTYTELKSSVRWLLPNIDLKDFPVILDYLRCHKYPYTSKGLFLIEKMOVQEGWVDEDCLYHFCSTPEFLYLRT  
LLVGADVQASSVASLARMVIRCGSERFFHFCNEESRTSMISATQRQKVLKSYLDCEESLAALLLVHDSVVLHEFCDEDLEKVIRLMPQ  
ESPYSQNFFSRLQHSPRRELACMSTQRVEAPRVQEDQDEEYVVQDGDLSWLIAKRFGIPMDKIIQKNGLNHHRLFPKGVLKLPKQSQ

>core/400/1/Org1\_Gene73

MKIDILSLFPGYFDGPLQTSILGRAIKQRLLDVQLTNLRDFGLGKWKQVDDTPFSGGGMMLMAEPVTSAIRSVRKENSKVIYLSPPQGALL  
TAEKSRELAASHLILLCGHYEGIDERAIESEVDEEISIGDYVLTNGGIAALVLIDAVSRFIPGVLGNGQESAERDSLLEGLGPQYTRPREF  
EGKEVPEVLLQGDHKAISQWRLEQSERRTYERRPDLYLNYLYKRSIDHKFDEETTTNRDHFCDKISVVLEVNLKRAKNFYCKVFGLDA

MSCENKFCLPHEGKTIFWLREVQAEKKNIVTSLSLDCACEEDFCYLLRRWELFGGKLEKQADEHAVWALAQDLGDHAWIFSWHR  
MK

>core/402/1/Org1\_Gene217

MSEAPVYTLKQLAELLQVEVQGNIETPISGVEDISQAQPHHIAFLDNEKYSSFLKNTKAGAILSRSQAMQHAHLKKNFLITNESPSLTFQ  
KCIELFIEPVTSGFPGIHPTAVIHPTARIEKNVTIEPYVVISQHAHIGSDTYIGAGSVIGAHSVLGANCLHPKVIRERVLMGNRVVVQPG  
AVLGSCGFGYITNAFGHHKPLKHLGYVIVGDDVEIGANTTIDRGRFKNTVIHEGTKIDNQVQVAHHVEIGKHSIIVAQAGIAGSTKIGEH  
VIIGGQTGITGHISIAHDVIMIAQTGVTKSITSPGIYGGAPARPYQETHRLIAKIRNLPKTEERLSKLEKQVRDLSTPSLAEIPSEI

>core/406/1/Org1\_Gene692

MMKKIRKVALAVGGSGGHIVPALSVKEAFSREGIDVLLLGKGLKNHPSLQQGISYREIPSGLPTVLNPIKIMSRTLSCSGYLKARKELKIF  
DPDLVIGFGSYHSLPVLLAGLSHKIPLFLHEQNLVPGKVNQLFSRYARGIGVNFSPVTKHFRCPAEVFLPKRSFSLGSPMMKRCTNHTP  
TICVVGGSQGAQILNTCVPQALVKLVNKYPNMYVHHIVGPKSDVMKVQHVVYNRGEVLCCVKPFEEQLLDVLLAADLVISRAGATILEEI  
LWAKVPGILIPYPGAYGHQEVNAKFFVDVLEGGTMILEKELTEKLLVEKVTFALDSHNREKQRNSLAAYSQQRSTKTFHAFICECL

>core/412/1/Org1\_Gene961

MNLPDRKKALEAAVAYIEKQFGAGSIMSLGRHSATHEISTIKTGALSLDLALGIHGVPKGRVIEIFGPRESSGKTTLATHIVANAQKMGGV  
AAYIDAEHALDPSYASLIGVNIDDLMISQPDCEGALSIAELLARSGAVDVIVIDSVAALVPKSELEGDIGDVHVGLQARMMSQALRKLT  
ATLSRSQTCAVFINQIREKIGVSFGNPETTTGGRALKFYSSIRLDIRRIGSIKGSNSDIGNRIKVKVAKNKLAPPFRIADEFDILFNEGISSAG  
CILDHAVEYNIIKKGSWFNYQEKKLGQGREFVREELKRNRKLFKEIEKRIYDVIAANKTPSVHANETPQEVPAQTVEA

>core/413/1/Org1\_Gene697

MNLCKRISFEEGLELFVSSPIERLQERADAIKERYPSNEVTYVLDANPNYTNICKIDCTFCAYRKPKSPDAYLLSFDEVRSLLQRYVSSGV  
KTVLLQGGVHPGLGIDYLEELVRITVQEFPSIHPHFFSAVEIEHACRVSGISIEQLQLRLWDAGQRTIPGGGAELSERVRKIISPKKMQPG  
GWINLHKLALHMGFRRTATMMFGHVENPEDILHLQTLRDAQDSCPGFYFIPWSYKPGNTALRRNVPQQASIETYRILALGRIFLDN  
FDHVAASWFGEGKSLGAKALHYGADDFGGVILDES VH KATGWSIQSSEEEICNIIRSEGFIPTVERNTFYQHISCTVSSL

>core/414/1/Org1\_Gene703

MKYSLNFKKIDYERVIEVTCSEKVRHLHAIHQTAVGPALGGVRASLYSSFEDACTDALRLARGMTYKAIISNTGTGGGKSVIILPQDA  
PSLTEDMLRAFGQAVNALEGTYICAEDLGVSINDISIVAEETPYVCGIADVSGDPSIYTAHGGFLCIKETAKYLWGSSSLRGKKIAIQGIGS  
VGRRLQSLFFEGAELYVADVLERAVQDAARLYGATIVPTEEIHALECDIFSPCARGNVIRKDNLADLNCKAIVGVANNQLEDSSAGMM  
LHERGILYGPDYLVNAGGLLNVAAAIEGRVYAPKEVLLKVEELPIVLSKLYNQSKTTGKDLVALSDSFVEDKLLAYTS

>core/419/1/Org1\_Gene789

MRIAVLGAGYAGLSVTWHLLLHSQGTATIDLFDPIPLGEGASGMSSGLLHAFTGKKALKPPLADQGINATHALITEASKALNPVIVISQG  
ILRPAIDEDQAQLFTERVEEFKEVEWWEKARCEISIPSMVIPPNLGALFIKSGVTLNNDLYIQGLADACMKLGTQFYDELIEDLADIEEFY  
DHIIVTPGANASILPELKDMPVNKVKGQLEISWPKDLAMLSFSINAHKYMVANTQKNTCILGATFEHNQPEETPDPAIAYQEIMPPVL  
SLFPGLKDAQVLHCYAGMRSSSKSRLPVISRIREKLWFLGGLGSKGLLYHGITGDMLAQAVLRKSTAYIAKEFLFTI

>core/420/1/Org1\_Gene715

MILLQNIKRCSLKQLKVLATLLLSLSLPTLEAAENRSDSIVWHLDYQEALQKSKEAELPLLVI FSGSDWNGPCMKIRKEVLESPEFIKRVQ  
GKFVCVEVEYLKHRPQVENIRQQNLALKSKFKINELPCMILLSHEEREIYRIGSFNETGSNLGDSLCHIVESDSSLRRAFPMMTSLSEL  
QRYRLAEELSHKEFLKHALELGVRSDDYFFLSEKFRLLVEVGKMDSEECQRIKKRLLNKDPKNEKQTHFTVALIEFQELAKRSRAGVRQ  
DASQVIAPLESYISQFGQQDKDNLWRVEMMIAQFYLDSDQWHHALQHAEVAFEAAPNEVRSHISRSLYIRHQS

>core/422/1/Org1\_Gene218

MDVSRKINRHTQFYVDSIDGVIKNFDHKPSEDKSRDHEELEEKLLTITKRIVASAEFQNRKTD SKNYLKKTQWL PFKNEELETKELF  
AMLTSMDDKIAQLFFYSPGCSSDWVEFTEVICH LND SIGLGGVLLCCGLFEQQCEHVVTVNKKLDLPLL GTTVVNSLRYYLT YRNISLLN  
CQSMSELGKELGDVLKQHGVAF TLIFKEIVDIDLNNYVKLIQGLKRSGNIQARIYDNDVPTLP SVSSSPIALRYSLANTIRGLALHVD FSSLK  
FISPSILSNT EHTAKALNSGGECFIFSNLDEFNLGMKIVMQLLRTGKISPEILNKNIMKILMIKRRVRSLYI

>core/428/1/Org1\_Gene748

MMEVYSFSPSVRTSFQHRVMAALDNWFFLGRRLLKVSLDSCNSGQACEEYVPISTTEKVLKILSYLLIPIV IALLIRYLLHSNFTAKVSQ  
KPWLKTLQLGIDIKSFILPGSHVNTMDSATLFKAIRLEGKRVDVEYHRLHSSDKVVFYIPAQKLPDDLRLTHWLPEKETRKTEYVRHMLA  
HVMGYLTSQGKERLQQVVQDSRSSTSLGAEKVLQYRFIDHPQSQGEFQRLNENITTKGSEDKEVVQSDLFDMAFQCWWPQFISVIO  
SPTFSEELVHEMSQKLDLDCIYPEDDEFEQKFLNTLLKAVLHHGFEGISVASMGVIFLICPDSLALQIPFLRNQK

>core/435/1/Org1\_Gene659

MFFQNLAKKLTALGISPLGCLLIGGVVSCAILFGRSSNPSLAPTQVKTEKTSGNWLKLTQMGNPKLIESLTKKEQLEKDLTSFHPIASAKV  
AIALSTEDDVMSPHLHSVILTLRKEESLTPSLLFSITDYLCSSLPGLKREHISLSDNLGNLYIPESITVNSLFIHTLENYLGKIFPKEHFALAYHAK  
AEKPTLQLTLNENYIAHLTKEESEKIVAHTKHYLYQNYDDSYDIVIETLPFARLQNKKSFPKVLIGSMILVISLMIVALASFYLARHAYERV  
SPEPRKIKRGINISKLEIIQKESPEKIALILSYLDPKKA EALLNRLPEDLKHQVLKYKL

>core/437/1/Org1\_Gene355

MTILRKLSQYLFFFSLFCSFIYVATCGSQPDSVSSPKIAIFLSFPHPLEDCSKSCIETLKDFENLPEIVVLNAEDSIVKARKIARSLHTDKNVV  
AIVTLGTIATKVM SHIETQKPVIYAAVPDRESLTPKNTMNIYGVNDTLDINQYCFAIQAVATNAQSIVYLKPSEFPFSDLQKEIVKKLHAS  
GIEVIEISITSSTFKTRIRQAIDKRPSAIFPLSPLSHKEGT AFLQEILKEKIPITDDTSLISEGACIACSVDYKKSGKQIAKIVHHLLYNNHDVDS  
LRKIIAQRLSPTTTTFNEDIKYLGIKLHKTERNQFLSFKSKLEKSEKGNVAVS

>core/445/1/Org1\_Gene562

MSYSLRNKKTICVYIIIALGILSFRSIPQEVYDKIRSSFVSLHVKFFPKIKQAPSSHLANLELENLVLKERVASLEEKLYEVSNHTPPLFPEIL  
TPYFHKLV EGVVYRDYTHWSSSCWVNVGKTHGIKKNSPVLSGNVLVGLVDYVGEHQSRIRLITDVGMKPSVVAMRGDIQSWWIKH  
SLRELIRQVEQISHAYILEKDKYEKISQLQELDSLQGEGENQALLRGILSGVGALWKEGSLCLEGEGFYFSEGKTLLPGDILVTTGLDGVF  
PPGLLVARVTKVKAPRDGACTFKIEAQSL EEEKLMELDQLFILPPLEFNPNDRPDIFGLLWD

>core/448/1/Org1\_Gene214

MWFSVNKNKKAIIWATGSYLPEKVL SNADLEKMVDTSDEWIVTRTGIKERRIAGPQEYTSLMGAIAAEKAIANAGLSKDQIDCIIFSTA  
APDYIFPSSGALAQAHLGIEDVPTFDCQAACTGYLYGLSVAKAYVESGTYNHVLLIAADKLSSFVDYTD RNTCVLFGDGGAACVIGESRP  
GSLEINRLSLGADGKLGELSLPAGGSRC PASKETLQSGKHFIAMEGKEVFKHAVRRMETA AKHSIALAGIQEEDIDWFVPHQANERIID  
ALAKRFEIDESRVFKSVHKYGNTAASSVGIALDELVHTESIKLDDYLLLVAFGGGLSWGAVVLKQV

>core/455/1/Org1\_Gene625

MQPFIFTLLCLTSLVSLVAFDAANARKRCACAQTIERGENFFSIKRSACAEIEYQEKSRRHASAIERISKDKGKVT PKQIAKVATKKKQRYRL  
LQVPFSRPPNNSRYNLYALLSEPPECYSDTASWYAIFIRLLRRAYVDTGNVPPGSEYAIANALISNKQEILERGAQLGPDVIETLTLPEEQA  
EIFYKMLKGSSNSQSLLNFLHYEEKSLGHCKLNLIFMDPLLEAVLDHPDAYRETSLLRDGIWEAVKRQEHAIQEHGQAAALELFKTRTD  
FRLELRDKMQLLSRYDLLPLLNKKMFDYTLGSAGDYFLVDPDTKAISRCRCPSKSIKL

>core/457/1/Org1\_Gene803

MRIAVLGVTGLVGQKFVALLHKWYRDWVIAEVVASNSKYGQSYGDACIWQEPIGMPPEMVRDLPIRKIEEVQSDIVVSFLPSSAESM  
EAYCLSQGKVVFSNASTYRMHSSVPIIPEVNSDHFQLLEEQPYPGKIITSPNCCVSGITLALAPLRKFSLDHVHIVTLQSASGAGYPGVPS  
LDLLANTVPHIVGEEEEKILRETVKILGSSKQPLPCKLSVTVHRVPVAYGHTLSLHVTFSKDVDLDEILYSYQEKNEFPNTYQLYDNPWSP  
QARKHLSHDDMRVHLGPITYGGDFRTIKMNVLIHNLVRGAAGTLLASMENYFFDYLKREMCLR

>core/460/1/Org1\_Gene567

MSSLTLSRRPRRNRKTAAIRDLLAETHLSPKDLIAPFFVKYGNNIKEEIPSLPGVFRWSLDLLLKEIERLCTYGLRAVMLFPIIPDDLKDAYG  
SYSSNPKNILCHSIHEIKNAFPHLCLISDIALDPYTTHGHDGIFLNGEVLNDESVRIFGNIATLHAEMGADIVAPSDMMMDGRIGYIRSKLD  
QSGYSKTSIMSYSVKYASCLYSPFRDALSSHVTSGDKKQYQMNPKNVLEALLESSLDEEEGADILMVKPAGLYLDVIYRIRQNTCLPLAA  
YQVSGEYAMILSAFQQGWLDKETLFHESLIAIKRAGADMIISYSAPFILELLHQGFEE

>core/463/1/Org1\_Gene735

MQFSRYLRYAFDNQYLPEPLYQKFSVFHQNYIDAATKKAADQAEVLCCLQWVKVIEDLKNPFIFPPYHKKIRAPIDLFRLSIDFFSLVIDD  
KNSRILNLHRLKEIEEYIARGDNVVLNANHQTCDPQLMYALGKTHPELMENMIFVAGDRVTS DPLARPFSMGCDLLCIYSKRHIATP  
PELREEKLLHNQKSMQILKTLLNEGKFIYVAPAGGRDRKNAEGRYPSEFSPESIEVFRLLAKASNQTTHFYFPALKTYDILPPPPKIENAI  
GEQRAIFFAPVFFNFGAELFFDALCSKEELIHCDKHAQRTLRAEKVFSIVKNLYEEL

>core/464/1/Org1\_Gene800

MREETVSWSLEDIREIYHTPVFELIHKANAILRSNFLHSELQTCYLISIKTGGCVEDCAYCAQSSRYHHTVTPPEPMMKIVDVVERAKRAVE  
LGATRVCLGAAWRNAKDDRYFDRVLAMVKSITDLGAEVCCALGMLSEEQAKKLYDAGLYAYNHNLDSPEFYETIITRSYEDRLNTLD  
VVNKSISTCCGGIVGMGESEEDRIKLLHVLATRDHIPESVPVNLLWPIDGTPLQDQPPISFWEVLRTIATARVVFPRSMVRLAAGRAFL  
TVEQQTLCLAGANSIFYGDKLLTVENNDIDEDAEMIKLLGLIPRPSFGIERGNPCYANNS

>core/465/1/Org1\_Gene343

MIDIMQHFKPYTMVPGQKLPIPGSLLYAQVFPTLWRLFSSKHEILNEQTLQVQGPLKRFAVFQDLHRGGLAVTSERYKYYLLPSGECTQ  
SIKGLPSAAQAGPLLSLGVHKKHADWQKVRCRRDLKEILPLWFRFAAMAPKGSYRDLETTAIGSLVKTAHQRVLHRETTEIAPALLSIAL  
AGFSECFLPRSYDEEFQGILPQDGDPEGGVPFELLSYSGMIQDIFLRHQGQLVEILPALPPEFPCGRLIHVALPNLGTLSIVWTKKTIRQV  
ELHAEYSGEVFLKFCSSLCSARLREWSERRLSGSKRLSLGETLEIKAGTTYLWDCFBK

>core/467/1/Org1\_Gene376

MPSPMISTDVCQDILGKQKEAVDFFFQAFQPKAMQLAEKILGHSGWVFFSGVGKSGCVARKLVATLQSLSERALFFSPVDLLHGDLG  
LVSPGDIVCLFSKSGETQELLDTPHLKSRRAILVAITSMYPYSNLAALSDLVVLPSVAELDPFNLIPTNSTTCQMIFGDFLAMLLFHSRGV  
SLSTYGKNHPSGQVGMKANGKVKDFMFPKTEVPFCHLGDKVSFSLEVFSAYGCGVCIVDPQFRLMGIFTDGDLLRRSLASYGGEVLSL  
SLEKVMTANPRCITEDSDIAIALQLMESSSPVAVLPVLDNEENRHVTGLLHMHTLAKAGLL

>core/472/1/Org1\_Gene250

MDAKMGYIFKVMRWIFCFVACGITFGCTNSGFQNANSRPCILSMNRMHDCVERVVGNRLATAVLIKSLDPHAYEMVKGDKDIA  
GSAVIFCNGLGLEHTLSLRKHLENNPNSVKLGERLIARGAFVPLEEDGICDPHIWMDLSIWKEAVIEITEVLIEKFPEWSAEFKANSEELV  
CEMSILDSWAKQCLSTIPENLRYLVSGHNAFSYFTRRYLATPEEVASGAWRSRCISPEGLSPEAQISVRDIMAVVDYINEHDVSVVPED  
TLNQDALKKIVSSLKKSHLVRLAQKPLYSDNVDDNYFSTFKHNVCLITEELGGVALECCR

>core/476/1/Org1\_Gene190

MTIDMHCDLLSHPHFCRKDPAVRCSPEQLLSGGVRQQVCAIFVPHSRGEPNCDKQNSLFFSLPNQYPDIGLLSYEEEEENGSSSQKKSLS  
LIRSIENASALGDDTAPLGTLLAKLIHLTKQGPLAYLGIVWKGDNRFGGGTEAPKRLSNDGKVLDDIMYELGVPIDLSHCSDKLAEDILDY  
TADKLPNLAVIASHSNFRSVLDHRRNLVDAHAKIVRRKGVIGLNLVRSYVGDSLGDLEKHVLHAENLGILSSIVLGSDFFYANEDENFFF  
NECSSAEHPVLNQLIHRIFSKGKAESILSSRAEKFLKQVIVEQVNPKITDVKL

>core/479/1/Org1\_Gene302

MELLPHEKQVVEYEKAIAEFKEKNKNSLLSSSEIQKLEKRLDKLKEKIYSDLTPWERVQICRHPSRPRTVNYIEGMCEEVELCGDRTFR  
DDPAVVGGFVKIQGQRFVLIGQEKGCDTASRLHRNFGMLCPEGFRKALRLGKLAKEFGLPVVFLVDTPGAYPGLTAEERGQGWAIK

NLFELSRLATPVIIVVIGEGCSGGALGMAVGDSVAMLEHSYYSVISPEGCASILWKDPKKNSEAASMLKMHGENLKQFGIIDTVIKEPIG  
GAHHPALVYSNVREFIIQEWLRLKDLAIEELLEKRYEKFRSIGLYETTSSESGPEA

>core/489/1/Org1\_Gene462

MRLLSILKLHLFSLRSSSSLSPHYHSCSRSMHLHLLCRWKDADIMEWQQICNILSGVCSRMSGKLVSLQKETQDSCHQEHERIHLQYRE  
QLSALEEEYRRREEAKNQDLEKLQQENTWLQNRLAEKLQQIRHQSDIIDEIKKELLQSVQRTEISEGRRLCYEHKIKQLEEQLQRYVSQH  
GAPSIEEEDKSSAAYAEINRLKKSLLDLQQEKDIYIKTYHSEIAKLREKLQRQEGAQTSSEVCSIEKLTEVQTDLAEKKAIALLDIVEDQY  
CQLRDLHKEKGMAMPSNTKLDHLKGLLGKEPESEVDVVFSESKSLGS

>core/490/1/Org1\_Gene738

MEVQIGIDLMGGDHSPLVVWQVLVDVLKSQSSTIPFAFTLFASEEIRKQIQEEFISDLPQEKFPKIISAENFVAMEDSPLAAIRKKSSSMA  
LGLDYLQEDKLDAFISTGNTGALVTLARAKIPLFAVSRPALLVCVPTMRGHAVILDVGANISVKPEEMVGFARMGLAYRQCLGDSKIP  
TIGLLNIGSEERKGTEAHRQTFRMLRETGGEAFLGNIESGAVFDGAADIVVTDGFTGNIFLKTAEGVFEFLQRILGDKLEADIQRRLDYTF  
YPGSVVCGLSKLVKCHGKACGSSLFHGILGSINLAQARLCKRILSNLI

>core/491/1/Org1\_Gene424

MLISISLATLPILAFSWASFIEPNWLRRTTAIPWRLPKKHAHLHGLRIAQISDLHFHKRVPEKFLNKVSKSIKNFSPDLIVFCGDLLCRARLED  
KERLETFLNTLEAPLGVFAILGNHDYSSYSRNTKGEITCIPEEKSRPIQRAIIAVMQGLFSSPSYRYDPNLTPQEPHPDLLKLLKNTPLTLLH  
NTTHVIPNTLNIVGLGDLFARQFHPEQAQFKNYDPSLPGLLLSHNPDGITRLQQYPGDFVLSGSHSGPQVTLSPWPKFARKFFERLSGLEN  
PYLARGYFVTKEGKQLYVNRGLGGLKRIRFCSPPEICYITCSYD

>core/492/1/Org1\_Gene765

MVLSSDLLRDDKQLDLFFASLDVKKRYLLALSGGSDSLFLFYLLKERGVSTAVHIDHGWRSTSAQEAKELEELCAREGVFPVLYTLTAAE  
QGDKDLENQARKKRYAFLYESYRQLDAGGIFLAHHANDQAETVLKRLLES AHLTNLKAMAERSYVEDVLLLRPLLHIPKSSLKEALDARG  
ISYLQDPSNEDERYLRARMRKKLFPWLEEVFGKNITFPLTLGEESAELSEYLEKQAQPFSAATHQDSQGELPCPDCLIQQAFLCKWV  
MKKFFNAGIAVSRHFLQMVDHLSRSSCATLRMRNKIVIIKPGVVVID

>core/493/1/Org1\_Gene502

MKFLLYVPLLLVLVSTGCDAPVSFEPFSGKLSTQRFEPQHSAEEYFSQQQEFLKKGNFRKALLCFGIITHHFPRDILRNQAQYLIGVCYFT  
QDHPDLADKAFASYLQLPDAEYSEELFQMKYIAAQRFAQGKRKRICRLEGFPKLMNADEDALRIYDEILTAFPSKDLGAQALYSKAALLI  
VKNDLTEATKTLKKLTLQFPLHLSSEAFVRLSEIYLQQAkkePHNLQYLHFAKLNEEAMKKQHPNHPLNEVVSANVGAMREHYARGLY  
ATGRFYEKKKKAEAAANIYYRTAITNYPDTLLVAKCQKRLDRISKHTS

>core/494/1/Org1\_Gene357

MNRRKARWVVALFAMTALISVGCCPWSQAKSRCIDKYIPVVRLLLEVCGLPEAENVEDLIESSAWVLTPEERFSGELVSICQVKDEH  
AFYNDLSLLHMTQAVPSYSATYDCAVVFGGPLPALRQRLDFLVREWQRGVRFKKIVFLCGERGRYQSIEEQEHFFDSRYNPFPTTEENW  
ESGNRVTPSSEEEIAKFVWMQMMLLPRAWRDSTSGVRVTFLAKPEENRVVANRKDTLLLFRSYQEAFPGRVLFVSSQPFIGLDACRVG  
QFFKGESYDLAPGFAQGVLYHWAPRICLHTLAEWLKETNGCLNISEGCFG

>core/495/1/Org1\_Gene848

MRKVAFLVSCFLSVAIGASAAPVRVPGFPQIPEDLVQIKTEVCPKQEVCLAVTIKDDHNLIGVLHLPNTPTPEGGFPTVVLFHGFRGTK  
FGGLTGAYRKLGRKFAAAGIATLRVDMAGCGDSEGVAEEVPIETYLRDAQTILETVQEHPDLNAYRLGISGFSLGCHIAFELAKIYNPRDL  
NIKALSVWAPIADGGILLKELYENFSKHGEGDIISVGKDFGFGPPPIIVCSGDVDLLIRIQDHVTANSLPTKPYILHQQGIDDTLVSRQQQT  
LFKNTAPGRMTFISYPNTGHNLATAPDLDMILDQIVSHFQRTL

>core/497/1/Org1\_Gene142

MLVELEALKREFAHLKDQKPTSDQEITSLYQCLDHLEFVLLGLGQDKFLKATEDEDVLFESQKAIDAWNALLTKARDVLGLGDIGAIYQTI  
EFLGAYLSKVNRRAFCIASEIHFLKTAIRDLNAYYLLDFRWPLCKIEEFVDWGNDCVEIAKRKLCTFEKETKELNESLLREEHAMEKCSIQD  
LQRKLSDIIIELHDVSLFCFSKTPSQEEYQKDCLYQSRLRYLLLLYEYTLCKTSTDFQEQARAKEEFIREKFSLLELEKGIKQTKLEFAIAKSK  
LERGCLVMRKYEAAAKHSLDSMFEEETVKSPRKDE

>core/498/1/Org1\_Gene277

MTLPMQKSLTSFDDFSQAYAEKVPAIALIGSALEDDKDALIELLVSESFKELGGQGLMPATLMSWTETFALFQEHETLGIIHAEKFPLAT  
KEFLSRYARNPQPHLTILIFTTKQECFRELSKALPSALSLSLFGWPADRQKRIIRLLLQRAERVGISCSQSLASLFLRALASTSLPDILSEFDK  
LLCSVGKKTSLDHSDIKELVVKKEKASLWKFRDSLLKRDPEVGHQQLHFLLDGEDPLGIITFLRTQCLYGLRSIEEGSKENKHRMFVLYG  
KERLHQALNSLFYAETLIKNNVQDPIVAVETLVIRMVNL

>core/500/1/Org1\_Gene246

MAMLPKFFLVLLCLGLSCSQKTTTIEGEQMTIFYRIVLGTSLSAKEKASLSQQIDRCFHKIDSIYNNWNPYSELSIINRAPADVPITLSVEL  
SEFLDQVDTLYKLSEGRFDPTVGPLKTLWLLHLKSQTLPPKDVWEQHYKDMGWQHLEFQSNTKTLIKKNPHVQIDLCGVVKGYAVDC  
LNEICNTFCPNNYVEWGGEIKTSGHHPSGRPWRIFSEAAGTILDIDDMAIATSGNHIQKWCVEGKIYTHILDTRTGKPLELSSYPIQSVS  
VVHPSCAYADAIATVLMTFDSKIEAKQWAEHHILTYINDGASS

>core/502/1/Org1\_Gene9

MIASIYSFLDYLMVKASASPHTLRNYCLDLNGLKIFLEERGNLAPSSPLQLATEKRKVSELPFSLFTKEHVRMYIAKLIENGKAKRTIKRCLS  
SIKSFAHYCVIQKILLENPAETIHGPRLPKELPSPMTYAQVEVLMATPDISKYHGLRDRCLMELFYSSGLRISEIVAVNKQDFDLSTHLIRIR  
GKGKKERIIPVTSNAIQWIIQIYLNHPDRKRLEKDPQAIFLNRFGRRISTRSIDRSFQEYLRRSGLSGHITPHTIRHTIATHWLESGMDLKTI  
QALLGHSSLETTTVYTQVSVKLLKKQTHQEAPHA

>core/504/1/Org1\_Gene780

MRKLILCNPRGFCSGVVRAIQVVEVALEKWGAPIYVKHEIVHNRHVNALRAKGAIFVEELVDVPEGERVISAHGIPPSVRAEAKARKL  
IDIDATCGLVTKVHSAAKLYASKGYKIILIGHKKHVEVIGIVGEVPEHITVVEKVADVEALPFSSDTPLFYITQTTLSDDDVQEISSALLKRYPS  
IITLPSSSICYATTNRQKALRSVLSRVNYVVVVDVNSSNSNRLREVALRRGVPADLINNPEDIDTNIVNHSGDIAMTAGASTPEDVVQA  
CIRKLSSLIPGLQVENDIFAVEDVVFQLPKELRCS

>core/509/1/Org1\_Gene28

MRLFSYDKPKIKVQKIKADGFSGWLKCNHCHEMIHANELGQNYNCCPKCSYHYRITAIERVKLLADKDSWRPLYTDLKSQDPLEFIDTD  
TYANRLEKARKNTTESEGVIVGICTIGLHPVALAVMDNFNFMAGSMGAVVGEKLTRLIEEAIETRLPVIIVSASGGARMQESVFSLMQM  
VKTSAALAKLHEAGLPYISVLNPTSGGVTASFAALGDIIIAEPKALICFAGPRVVAQVIGEDLPEGAQKSEFLLEHGMIDKIVERKELKTTL  
QTLLDYFLAQEYTGGSKAPRDLSKRLKEIFLLTDDSE

>core/516/1/Org1\_Gene786

MTMPSTQFHTTILEQFSLFLSVDRGLCQQSIAAYRQDISSFLTISAISSPQDISQNSVYIFAEELYRRKEAETTLARRLIALKVFFLFLKDQQL  
LPYPPIIEHPKIWKRLPSVLTPQEVDALLAVPLQMEKNPRHLAFRDTAILHTLYSTGVRVSELCDLRLGHVSDDCIRVTGKGSKTRLVPLG  
SRAREAIDAYLCPFRDQYQKKNPHEDHLFLSTRGHKLERSCVWRRIHNYAKQVTSKPVSPHSLRHAFATHLLDNKADLRVIQEMLGHA  
RIASTEYVYTHVAADSLIEKFLAHHPRNL

>core/519/1/Org1\_Gene192

MHLEENQGWEEALLRKVYHQEVPPAILLHGFTLPVLQDKAEQLASEILLSSSPGSEHKVSQKIHPDIYQFFPEGKGRlhsIDLPRGIKKQI  
YISPFANYKIYIIEADRMTLAAISAFKVFEEPPKHAVIILTAKVQRLPKTIISRLSIFIERGEKILCSKETFSYLFYQAQCEIPVTEVSQIIKE  
SSETDKQVLRDKVQRFMEVLLLELYRDRYTLNLGLKASALNYPEHVKEILQLPLPLDKVLLIVESACRSLNNSSSAASVLEWVAIQVLSLQY  
KEKELVSVSPGQDLSN

>core/526/1/Org1\_Gene685

MQEKPRHVHRIIHISDVHFHVLVPVNPVHCFNKRLKGLLRKVFGVLVHFQATTIGQRFKVVRSLGADSVCTGDFSLTAMDGEFLLAKHF  
VETLAKHSSVYLLPGNHVDVYTLKSLAQQTfYTHFPNDQLQQNKVSFHKITDHWLILLDCSCLNGWFSANGVVHLAQISAIETFLLSLS  
PEENVIIANHYPLLSSQNPSHDLINNTHLQNVLKYPKVRLYLHGHEHQAAYVNCADTSPSYILNSGSISLPTNSRFHVIDLYPEKYQVHT  
MILKNLLDFDAPLEIANEATWDCQKL

>core/527/1/Org1\_Gene297

MEKLLVTDIDGTITHQSHHLDKKVYERLYALHQAGWKFLFLTGRYYKYAARLFSDFDAPYLLGCQNGASVWSSTSSNLLYSKSLPSDLLC  
ILQDCMEGATALFSVESGAPYGDHYRFSPPTPIAQDLHEYVDPRYFPNAKEREILFETRSLKDDYAFPSFAAAKVFLRDEVIRIQKELER  
QEALTSVATMTLMRWPFDFRYAILFLTDKSVSKGKALDRVVNilyDGKKPFVMASGDDANDLDLIERGDFKIVMSSAPEEMHVVHADP  
LAPPADKNGILSAWEAGVRYDDLMSL

>core/530/1/Org1\_Gene683

MSKHTSESRIAQDMLERYSGSSVKQFCPYLLLTNFSYIQTFAKLHGVPVFEGSMFSAAHAPHLKTSILDFKLGSPGAALTIDLCsFLPDL  
KAALMLGMCGGLRSHYQVGDFVPVASIRGEGTSDAYFPPEVPALANFVVQKATTEVLEDKKANYHIGITHTTNIRFWEFNKKFRKKL  
YETKAQSAEMECATLFAAGYRRNLPIGALLISDLPLRKEGIKTSSGNFIFNTYTEDHILTGQEVIENTLEKVMLKRAASDHKKDQQYRGL  
PHMEVGEADDTMASGSETSDSDY

>core/531/1/Org1\_Gene556

MKVLPPPSIPLLGAHTSTAGGLKNAIYEGRDIGASTVQIFTANQRQWQRRALKEEVIEDFKAALKETDLSYIMSHAGYLINPGAPDPVIL  
EKSRIQIYQEILDCITLGISFVNFHPGAALKSSKEDCMNKIVSSFSQSAPLFDSSPPLVVLETTAGQGTLIGSNFEELGYLVQNLKNQIPIGV  
CVDTCHIFAAGYDITSPQGWEDVLNEFDEYVGLSYLRAFHLNDSMFPLGANKDRHAPLGEGYIGKESFKFLMTDERTRKIPKYLETPGG  
PENWQKEIGELLKFSKNRDS

>core/546/1/Org1\_Gene516

MTEEISKDTIIEVAIDDIRVSPFQPRRVFSNEELQELIASIKAVGLIHPPVVREICTGDRVLYYELIAGERRWRAMQLAGATTIPVILKHVIA  
DGTAAEATLIENIQRVNLNPIEMAEAFKRLIHVFGLTQDKVAYKVGKKRSTVANYLRLLALSQTIQESLLQGQITLGHAKVILTLEDPIPREK  
LNEIIIQEH LAVREAELIAKQLISEEGSSI ELKPTPLDMAESSKQHEELQQLSDLCGYKVQIKTRGSKATVSFHLQNTQDLQKLEAWLSSH  
GTLSESLS

>core/549/1/Org1\_Gene347

MHEVLILTFTYPLPRTLKQHPDEVHTVPISPNSLFGEGSPILIAGPCTLESYEHTVSSALTVKEAGAQVFRGSIRKPRTSPFSFQGWKEECV  
LWHKEAQSIHGLPTETEVLDVRDVEITAEHVDILRIGAKNMHNTPLLQEVSKSHRPIILKRSPAATLEEWLCAA EYILASSPSCPGVILCER  
GIRTFEHSTRYTLDLNTVALLKEISSLPVIVDPSHAAGKRSLVPLASAGLSVGADGLMIEVHAHPEKALCDAKQKITPEELHLFAKKHFCP  
SESRAHAIS

>core/558/1/Org1\_Gene487

MLERTQRTLKREVRYSVGVIHLGKSSTLHLQPAQTNTGIVFQRQSASGNYENVPALLDHVYTTGRSTTLRGS AVIATVEHLM AALRSN  
NIDNLIQC SGEEIPIGDGSSNVFVELIDQAGICEQEDKVS IARLTRPVYYQH QDIFLA AFPSDELKISYTLHYPQSSTIGTQYKSLVINEESFR  
QEIAPCRTFALYNELCFLMEKGLIGGGCLDN AVVFKDDGIISRGQLRFADEPVRHKILD LIGDLSLVGRP FVAHV LAVSGHSSNIAFGKK  
ILEALEL

>core/564/1/Org1\_Gene390

MHKVIVFIFLTLYSLKSYGNDVIDKPHVLVSIAPYKFLVEQIAEETCFVYAIVTNHYDPHTYELPPQQIKELRQGD LWFRIGEAF EKT CERN  
LTCQQVDLSQNVSLIQGKPCCNQH TTNYDHTWLS PKNLKVQVETIVTTLSKKYPQHATLYQSNGEKLLLALDQLNEEILTITSKAKQRH

ILVSHGAFGYFCRDYNFSQHTIEKSSHVEPSPKDVARVFRDIEQYKISSVILLEYSGRRSSAMLADRFHMHTVNLDPYAENVLVNLKTIAT  
TFSSL

>core/565/1/Org1\_Gene950

MYFTRDPIIETVITSREGYKLSVRNTKHFSQDPFMVEAIEVISLGNICFFRNCDHSPFLVPAGDYEVM EVRDTKINLKAVGLDRGVKIAG  
GREALIKLTSTPLPVIDEKPLADSPEEGTEPTSPSKKEKKEARKDSFKGEKWKEKKLSRRRNHKEIAEVTGASQEILDTVKEELWEESQE  
NEIVEQKKFSLLPPPAAKLISEVISQTVVDPVVTSA DLNESLQALVRESSDLINALLSADDAIHFPETEEPT SASFEESSAMFFPETSSATEEE

>core/569/1/Org1\_Gene631

MTANTFGTLDILMKHSHKEDDL SRFLPKNLLVESPHPEEIPLKSLSFTMSWLPTIHPSWITIAMKEFPPEIQGQLLAWLPEPLVQEILPLLP  
GSIAPHRCAPFGAFYLLDMLS KIRPCGITEEIFLPASSANAILYYTGPVKIALINCLGLYSIAKELKHILDKVVI ERVKNALSPTEKLFLTYCQ  
SHPMKHLETTN FLSSWTTDAELRQFVHKQGLEFLGKALTKENASFLWYFLRRLDVGRAYIVEQTLKTWYDHPYVDYFKSRLEQCMKVL  
VK

>core/570/1/Org1\_Gene380

MDYKLLDSGDGNKLECFGPVTLIRPSSIAVWP KSRPELWSQAQLQYVREGERGAWKNFKRLPEEWEVAFSDVRCLLKRTPF GHLGVF  
PEHMGFWPALKQAIEKHKERQVLNLFAYTGAGSIFA AKCGARVTHVDASQA AVRWAQRNVEKNAFPERRIFWVIEDVISFLKKEIRR  
NKKYQVILLDPPSYGRGPDGEVFKIDKDLFLLSLCSKLLADDASYFLLTSHTPGHTPEFLRAIARRSVPTLVSEAWSCGESFCGEGVGALP  
SGSFVQWIA

>core/571/1/Org1\_Gene104

MITGVVLEKHEQRTMFSLTLLNNFTTFGLLHTPLHYNPPYPIVILLHGLASDKTGSKRSHVRLAQELTRLGIAALRVDLLGHGDCEGELM  
DFSLENYKQNIREIIEYTHSLLHIDQERLAIFGSSLGGTLALQTL PFFNKIKALAVWAPTISGELMAAEAQKNAPEVITMSQKGAITYAGM  
TLNPDFYTQFLKIDIVKELMPSARNLPPILYMQGEQDLLVSINHRTL FTEAFANQDKPITILTPDVDHAFPPFAESSALSDLTQWLKRELTS  
GE

>core/572/1/Org1\_Gene551

MLLGFLCDCPCASWQCAAVANCYDSVFMSRPEHKPNIPYITKATRRGLRMKTLAYLASLKDARQLAYDFLKDPGSLARLAKALIAPKEA  
LQEGNLFFYGCSNIEDILEEMRRPHRILLGFSYCQKPKACPEGRFNDACRYDPSHPTCASCSIGTMMRLNARRYTTVIIPTFIDIAKHLHT  
LKKRYPGYQILFAVTACELSLKMF GDYASVMNLKGVGIRLTGRICNTFKAFKLAERGVKPGVTILEEDGFEVLARILTEYSSAPFPRDFCEI  
H

>core/575/1/Org1\_Gene283

MKLLKNVLLGLFFSMSISGFSEVKVSDTFVKQDTVVEPKIRVLLSNESTTALIEAKGPYRIYGDNVLLDTAIQGQRCVVHALYEGIRWGEF  
YPGLQCLKIEPVDDTASLFFNGIQYQGSLYVHRKDNHCIMVSNEVTIEDYLKSVLSIKYLEELDKEALSACIILERTALYEKLLARNPQNF  
W  
HVKAEEEGYAGFGVTKQFYGVVEEAIDWTARLVVDSPQGLIIDAQGLLQSNVDRLAIEGFNARQILEKFYKD VDFVVI ESWNEELDGEIR

>core/576/1/Org1\_Gene197

MKKKLSLLVGLIFVLSSCHKEDAQNKIRIVASPTPHAELLESQEEAKDLGIKLKILPVDDYRIPNRLLLDKQVDANYFQHQAFLDDECERY  
DCKGELVVIKLVHLEPQAIYSKKHSSLERLKSQKKLTIAIPVDRTNAQRALHLEECGLIVCKGPANLNMTAKDVC GKENRSINILEVSAPL  
LVGSLPDVDAAVIPGNFAIAANLSPKKDSLCLDLSVSKYTNLVVRSEDVGSPKMIKLQKLFQSPSVQHFFDTKYHGNILTM TQDNG

>core/577/1/Org1\_Gene344

MVRDIQSESIGKLVFLGTGNPEGIPVPFCSCRVCQNTGIHRLRSSVLIQYQNKTLVIDAGPDFRTQMLVAGVSELDGVFLTHPHYDHIG  
GIDDLRAWYIVTQRSPLVLSASTYRFLNKAKEYLFATPNVESSLPAVLEFTILNEDCGQEEFQGIPYTYVSYYQKSCHVTGFRFGNLAYLT  
DLCSYDAKIFS YLDNVETLILSAGPSETPIPFQGHKSSHLTVEEAKAFANHAGIKNLIITHISHCLEAERDQHPEVTFAYDGM EVLWTL

>core/582/1/Org1\_Gene906

MTQYYFLSSFLPTQLPESVPLFSISDLDDL LYLNLSENDLCNYGLLKRFFDFENFAFFWAGKPIPFSGEVTQENIERMLSSQQWSD DND  
FEDFFKDFLMNHKSSQDRLNHFSDLFREFLSYHQTNSSKFLQDYFRFQQQLRVVLAGFRARVLNMDVSYVLRDEDS DPVVLEVLMQ  
KDSPNYELPEEFSDLQGVLD DYGLLPHTLNRALALYQFHKLEGFCSDSYFDGNVILARCATYMF AIRNSLASVEKGREIINHIEKAIKW

>core/583/1/Org1\_Gene124

MHSKFLSRRKKNSSHKEETSWDCIASSYNKIVQDKGHYYHRETILPQLPSLTGSKSSVLDIGCGQGFLERALPKECRYLGIDISSRLIALA  
KKMRSVNSHQFKVADLSKRLEFVEPTLFSHAVAILSLQNMEFPGEAIRNTATLLEPLGQFFIVLNHPCFRIPRASSWHYDENKKAISRHID  
RYLSPMKIPIMAHPGQKDSPSTLSFHFPLSYWFKELSSHGFLVSGLEEWTSSTSTGKRAKAENLCRKEFPFLMISCIKIK

>core/585/1/Org1\_Gene674

MQGFFPLASGSKGNSAYLGTDSCKILIDLGVSKQVVTRELLSMNIDPEDIQAIFVTHEHSDHISGIKSFVKAYNTPIVCNLETARALCHLLD  
SHPEFKIFSTGSSFCFQDLEVQTFNVPHDAVDPVAFIFHYREEKLGFCITDLGWVTSWITHELYDCDYLLIESNHSPELVRQSQRPDVYKK  
RVLSKLGHISNQECGQLLQKIITPKLKKLYLAHLSTECNTAELALSTVSESIAITSIAPEIALAQGITSPIYFSRLEVACPR

>core/587/1/Org1\_Gene19

MKKPDNDSTFDVRSFFPFDVLCIEQLRKEMSWEVVSAKIPRLPRGWYELMGLSKEDRIDFCLDFWCSVLGIEHKESPSICRFFSLLETIEV  
YIYRLEKEPYQLKMFYVFRDGRCGFQGEPPLLDFLGHHRLPPLGDRHYEKFFSIHNGFGKWEDEGIFPMRSLAKVQQKLRQQLVVMN  
KMQAEDNCYSLGIFPFYGYEFPAYQSFFFDPEIRRDLPSPNVLLNEESLEHRSLETIELLHLSKSYPPSFLSWLENYLHSEEVYNE

>core/593/1/Org1\_Gene371

MSNQLQPCISLGCVSYINSFPLSLQLIKRNDIRCVLAPPADLLNLLIEGKLDVALTSSLGAISHNLGYVPGFGIAANQRILSVNLYAAPTFFN  
SPQPRIAATLESRSSIGLLKVLRCRHLWRIPTPHILRFITTKVLRQTPENYDGLLLIGDAALQHPVLPGFVTYDLASGWYDLTKLPFVFALLH  
STSWKEHPLPNLAMEEALQQFESSPEEVLKEAHQHTGLPPSLLQEYALCQYRLGEEHYESFEKFREYYGTLYQQARL

>core/600/1/Org1\_Gene791

MKTWLFFTFLFSCSSFYASCRYAEVRSIHEVAGDILYDEENFWLILDLDLDTLLQGGEALSHSIWKS KAIQGLQKQGTPEQEAWAVVPF  
WIEIQEMGTVQPIESAIFLLIEKIQKQGKTTFVYTERPKTAKDLTKQLHMLNVSLEDTAPQPQAPLPKNLLYTSGLFSGDYHKGPGLDL  
FLEICTPLPAKIIYDNQKENVLRIGDLCQKYGIAYFGITYKAQELHPPYFDNIAQVQYNYSKKLLSNEAAALLLRHQMHHE

>core/606/1/Org1\_Gene346

MIKQIGRFFRAFIIMPLSLTSCESKIDRNRIWIVGTNATYPPFEYVDAQGEVVGFDIDLAKAISEKLGKQLEVREFAFDALILNLKKHRIDA  
ILAGMSITPSRQKEIALLPYYGDEVQELMVVSKRSLETPVLPLTQYSSVAVQTGTTFQEHYLLSQPGICVRSFDSTLEVIMEVRYGKSPVAV  
LEPSVGRVVLKDFPNLVATRLELPPECWVLGCGLGVAKDRPEEIQTIQQAITDLKSEGVISLTKKWQLSEVAYE

>core/615/1/Org1\_Gene84

MFKLLKNLFLIGCCIVGYFWMRKESIVEQWLSNRLHTQVTVGRVSIRTSGIKIRHICIHNPASERFPYAAEIEYADVRFSSISMLLTQLEI  
SELIHGANFTIFPYDSHGKTKNWSLVWKNFHPQKETPSNLWIDRAPVLIRRCFLNTRLYGLRANHKKDIPHLSVPSLEFHSHTSSAKELP  
KLSEALPSLLYLAEESLYHLNLPGDIIKPLSQQAHKHFYSSYPQFQDRLNDINTPGTPTEEIIGFIRGLFFH

>core/617/1/Org1\_Gene258

MKTQQTQNIIEVWNFYWETQEIEYRDSLIEFYLPVKSVVHRLISGMPSHVKTEDLYASGVEGLVRAVERYNPERSRRFEGYAVFLIKAA  
IIDDLRKQDWVPRSVHQKANKLSGAMDSLRQSLGKEPTDELCEYLNISQQELSGWFVSARPALIVSLNEEWPSQSDEGAGMALEERI  
PDERAETGYDVVDKQEFSLCLANAIQELEEKERKVMALYYYEELVLKEIGKVLGVSESRSVSIHSKALLKLRAALSAFR

>core/621/1/Org1\_Gene613

MKTIAVNSFKGGTAKTSTTLHLGAALAQYHQARVLLIDFDAQANLTSGLGDPDCYDSLAVVLQGEKEIQEVIRPIQDTQLDLIPADTW  
LERIEVSGNLAADRYSHERLKYVLGQSVQDKYDYVIDTPPSLCWLTESALIAADYALICATPEFYSVKGLERLAGFIQGISARHPLTILGVALS  
FWNCRGKNNSAFAELIHKTTPGKLLNTKIRRDITVSEAAIHGKPVFATSPSARASEDYFNLTKEILLRDI

>core/623/1/Org1\_Gene375

MHDALLSILAIQELDIKMIRLMRVKKEHQKELAKVQSLKSDIRRKVQEKELMENLKTQIRDGENRIQEISEQINKLENQQAQVKKMDE  
FNALTQEMTTANKERRSLEHQLSDLMDKQAGGEDLIVSLKESLASTENSSSVIEKEIFESIKKINEEGKALLEQRTELKHATNPILLSIYERL  
LNNKKDRVVVPIENRVCSGCHIVLTPQHENLVRRKKDRLIFCEHCSRILYWQESQVNAQENSTAKRRRRRAAV

>core/624/1/Org1\_Gene165

MKPEESECLCIGVLPARWNSSRYPGKPLAKIHGKSLIQRTYENASQSSLLDKIVVATDDQHIIDHVTDFGGYAVMTSPTCSNGTERTGE  
VARKYFPKAEIIVNIQGDEPCLNSEVVDALVQKLRSSPEAEVTPVALTTDREEILTEKKVKCVFDSEGRALYFSRSPIPFILKKATPVYLHIG  
VYAFKREALFRYLQHSSTPLSDAEDLEQLRFLEHGGKIHCIVDAKSPSVDYPEDIAKVEQYITCLSNAFY

>core/626/1/Org1\_Gene434

MQICVTGVVLRSRPLGKNHTLTTLFTPEGLFTFFAKQGQTLQCDYRETLVPISLGKYTLHRNGSRLPKLTHGDILNAFEAIKQTYALLEAS  
GKMIQALLASQWKEKPSHKLFSLFLNHLRIPESSNPEFFAAIFVLKLLQYEGILDTLPCSLCKASLPYACYRYQGHKLCKKHQHKQAISI  
EKEEQILQAIHAKQFSELLAIAEFPIAIAEKIFYLFDLQEEKKSERNSSEDYPHEILRLSKVVHPY

>core/628/1/Org1\_Gene139

MLMDISHILEDLAYDEGILPREAIEAAIVKQMQITPYLLHILHDATQRVPEIVNDGSYQGHLYAMYLLAQFRESRALPLIILKFAFEDDTPH  
AIAGDVLTEDLPRILASVCNDDSLIKELIETPKINPYVAAAISGLVTLVGAGKIPRDKVIRYFAELLYRLEKQPSFAWDNLIAGICTLYPGE  
LFYPISKAFDGGLVDTSFISMEDVENIHEETVESCIHTLCSSTELINDTLEEMEKWLEDFPIEP

>core/633/1/Org1\_Gene612

MGNLKTLLSRFKNTPTKMEALARKRMEGDPSPLAVRLSNPTLSSKEKEQLRHLLQHYNFREQIEEPDLTQLCTLSAEVKQIHHQSVLL  
HGERITKVRDLLKSYREGAFSSWLLTYGNRQTPYNFLVYYELFTLLPEPLKIEMEKMPRQAVYTLASRQGPQEKKEEIRNYRGERKSELL  
DRIRKEFPLVETDCRKTSPVKQALAMLTGSGQILTKCTSLSSDEQIILEKLIKLEKVKSNLFPDTKV

>core/635/1/Org1\_Gene490

MSLLKDTVFTCLDCENTGLDVKKDRIIEIAAVRFTFDSVISSIEFLINPERVVSAESQRVHHISNAMLRDQPKIAEVFPQIKAFFKEGDYIV  
GHSVGFDLQVLAQEMERIGETFLSKYTIIDTLRLAKEYGDSNNLSLAVHFNVPYDGNHRAMKDVEININIFKHLCKRFRFTLEQLKQV  
LAKPIKMKYMPGLGKHKGRCFSEIPLAYLQWASKMDFDSDLFSIRHEIKHRQKGTGFSQVNNPFMEL

>core/639/1/Org1\_Gene527

MAKQTRRVLFKISGEALSKDSSNRIDEMRLSRLVSELRAVRNNDIEIALVIGGGNLRGLAEQKELQINRVSADQMGM LATLINGMAVA  
DALKAEDIPCLLTSTLSCPQLADLYTPQKSIEALDQGKILICTTGAGSPYLTTDTGAALRACELNVDVLIKATMHVDGVYDKDPRLFPDAV  
KYDFVSYKDFLSNQLGVMDASAI SLCMDSHIPIRVFSFLQHSLEKALFDPTIGTLVSEDVNHVCSPRH

>core/641/1/Org1\_Gene448

MHIYGLADLHLALGVPEKTMEVFGDPWIGYHQKICSEWQAVVHPEDIVLLPGDISWAMN LSEAHKDFAFIGDLPGTKYMIRGNHDY  
WSSASTSKILQALPPSLYYLNQGFALLTPHLAVVGVRLWDSPTICVKKENFLTPSTQE QSYTEQDEKIFLRELGR LKRAFAALPKEVTEVIV  
MTHYPPISDGTGPGPISEFLEADGRVSLCLFGHIHKVQRPIDGFGNIRGIHYILVAADYVNFVPQEV M

>core/642/1/Org1\_Gene580

MKITTVKTPKIYPYDDLYSILESSLPKLNERSIVVITSKIVSLCEGAVVELEKVS KDELIKQEADAYVFVEKYGIYLTKKWGILIPSAGIDESNVE  
GYFVLYPRDFLLSVNTLGDWLRNFYHLEHCGIIISDSHTTPLRRGTMGLGLCWNGFFPLYNYVGKPD CFCGRALKMTYSNLLDGLSAAAV  
LCMGEGDEQTPIAIIIEAPKITFHSSPTTLQDMSTLAI AEDEDLYGPLLQSMAWETPAPTS

>core/651/1/Org1\_Gene322

MKVRIVDSGKSSAASHMAKDRDLLES LQDGELILHLYEWENPCSLTYGHFMRPEKFLLSNYADLGLDAAVRPTGGGFV FHKGDYAFSV  
LMSATHPSYSSSVLENYHTVNSFVAKVLEKV FRIQGMLAPEDENSSSRDSGNFCMAKTSKYDVLFGDKKIGGAAQRKVQQGFLHQGS  
LFLSGSSSEFYQRFLKPEVLEEII EQIQIHAF FPLGLEAADEV LQEARQQVKEAFIKLFCGEGL

>core/652/1/Org1\_Gene835

MTLYLLPNTLGTTRAVETLPSVIGELVHRLDGLIVESDRGGRAFLSLWKIPEVHKFPLAILSKHARLPKAWDFYLEPIVKHGENWGLISDAG  
LPCIADPGASLVRRARALGIPVQAFSGPCSITLALMLSGLP SQSFTFLGYLPQSPKERVKS IKAATSKEVSTSVCIETPYRNVYTFESLLDTL  
PSYAELCVASDLSGPSELVLTRQVQSWRTTEDLGSVKQSITKVPTIFL FHIPN

>core/654/1/Org1\_Gene492

MDISGAVKQKLLQFLGKQKKPELLATYLFYLEQALSLRPVVFVRDKIIFKTPEDAVRILEQDKKIWRETEIQISSEKQVNNENTKRIYICPFT  
GKVFADNVYANPQDAIYDWLSSCPQNMEKQGGVRIKRFLVSEDPDVIKEYAVPPKEPIIKTVFASAITGKLFHSLPPLLEDFISSYLRPMT  
LEEVQNQTKFQLESSFLSLLQDALVEDKIAAFIESLADDTAFHVVISQWVDTEE

>core/661/1/Org1\_Gene571

MIGDKIILFVTEDLSLSSQLKDLASQRSYQILVSPVFPTSFESVAIFCEYLLLPEQIFSPGIFPEEDLIVLFDTFQEEAITKVLNQGATGYLLRP  
ITAKVLDAVIRAFLRQHEVLEHSIPDTMTFGDHTFRVLNLVIESPEGSVYLTPEAGILKKLLINRGHLCLRKNLLAEIKGNTKEIARNVDV  
HIASLRKKLGPYGSKIVTIRGVGYLFSDDDSIPLQNHNTAHPNEE

>core/662/1/Org1\_Gene873

MTKVRLNKFLASAGVASRRKCDEIIFSGSVTVNGRVAEGPFVLVDPEDKVQVGGTSVHLTKKVYFMVHKAIGYLCSEKKFPGTKLVIDL  
FAHLPYRVFTVGRLDKETSGLLVTNDGEFANKIIHPSSGITKEYLLKVS RDVSAKDLGKLMEGTFIDGKHVRPVSVTKIRRGTVKIVVSEG  
KKHEIRLFADAAGLPILELKRIRIGSLVLGGLRYGEYRELDAELGYMKLSD

>core/665/1/Org1\_Gene458

MPTTNCIFDLRGHSILHQLQIEEALLRVANQNFCIINSGAKDSIVLGISRNLNQDVHISRAQADHIPIIRRYSGGGTVFIDSNTLMVSWI  
MNSSEASAQPQELLAWTYGIYSPLLPNTFSIRENDYVLGHKKIGGNAQYIQRHRWVHHTTFLWDIDLKLSYYLPIPQQQPTYRNQRS  
HEEFLTLRPWFPSRDDFLERIKASGSLLFTWEEFLDNELEEILAQPHRKATTVLN

>core/667/1/Org1\_Gene630

MKFFSLIFKDDDVSPNKKVLSPEAFSAFLDAKELLEKTKADSEAYVAETEQQCAQIRQEAKDQGFKESSESWSKQIAFLEEETKNLRIRVR  
EALVPLAIASVRKIIGKELELHPETIVSIISQALKELTQNKHIIISVNP KDLP LVEKSRPELKNIVEYADSLILTAKPDVTPGGCIIETEAGIINAQ  
LDVQLDALEKAFSTILKAKNPVDEPSETSSSTDSSSLSDNDQDKKE

>core/668/1/Org1\_Gene690

MNRRDMVITAVVVNAILLVALFVTSKRIGVKDYDEGFRNFASSKVTQAVVSEEKVIEKPVVAEVPSRPIAKETLAAQFIESKPVIVTTPPV  
PVVSETPEVPTVAVPPQPVRETVKEEQAPYATVVVKKGDFLERIARANHTTVAKLMQINDLTTTQLKIGQVIKVPTSQDVSNEKTPQTQ  
TANPENYYIVQEGDSPWTIALRNHIRLDDLLKMNDLDEYKARRLKPGDQLRIR

>core/671/1/Org1\_Gene43

MTKHGKRIRGILKNYDFSYSYSLREAIDILKQCPPVRFDQTVDVSIKLGIDPKKSDQQIRGAVFLPNGTGKTLRILVFASGNKVKEAVEAG  
ADFMGSDDLVEKIKSGWLEFDVAVATPDMMREVGKLGKVLGPRNLMPTPKTGTVTDDVAKAISELRKKGKIEFKADRAGVCNVGVGK  
LSFESSQIKENIEALSSALIKAKPPAAKGQYLVSTISSTMGPGISIDTRELMA

>core/673/1/Org1\_Gene164

MLQSCKKALLSIVVSILAFHPIPGMGVEAKSGFLGKVKGWFSKKEIQEEARILPVKDSLWKRYDYTSSSGFSVEFPGEPDHSGQIVEVP  
QSEITIRYDTYVTETHPDNTVYVVSWEYPEKVDISRPELNLQEGFSGMMQALPESQVLFMQARQIQGHKALEFWIVCEDVYFRGMLI  
SVNHTLYQVFMVYKNKNPQALDKEYEAFSQSFKITKIREPRTIPSSVKKKVSL

>core/676/1/Org1\_Gene427

MYLEDYDVFFFDLDGLLDTEPCFYRAFLQACAEFSLEVHWDFSTYYSHHTLGTEIFSKKFIEQYPQAEYMAEIFAKRLQIYYKSLEHAG  
PALMPGVEAFIELVLSLNKTFGVVTNSPRDATHTLRTMYPILNKFLFWVTRENYARPKPYGDSYDYAYRTFAREGMKVIGFEDSVKGLR  
ALSKIPATLVCINSMAEITPEDYPELKGKEFFSYPSFDVLTEHCSQQKLL

>core/680/1/Org1\_Gene432

MRPHRKHVSSKSLALKQSASTHVEITTKAFRLSMLPKQLILEKSDHLPPMETIRVVLTS HKDKLGT EVHV VASHGKEILQTKVHNANPYT  
AVINAFKKIRT MANKHSNKRKDR TKHDLGLAAKEERIAIQEEQEDRLSNEWLPVEGLDAWDSLKTLGYVPASAKKKISKKKMSIRMLSQ  
DEAIRQLESAAENFLIFLNEQE HKIQCIYKKH DGNVVLIEPSLKP GFCI

>core/685/1/Org1\_Gene854

MDLKLDEVASLLDVSEHTVLQWLKEGAIPSYSMNNEYRFSREEIEDWLLHNQALMIQERGEDKEALKDLSLKYSLYKAIHRGGVLCDDV  
VHSKEEALQYASKYIAQKFQLDESVLFEMLSHRENLMSTGIGEGIALPHAKDFLINAYYDIVVPMFLAEPYEGALDGKPVGILFFLFACQ  
DKSHLNLVNVKIVHLGMSLNARSFFKNYPNKDQLLAYVKEWESQTH

>core/686/1/Org1\_Gene948

MILRISTVSLTSCSFSKNSRTCFVTPERITSQKDCPVLLHPKSTTISPPLYDWIPPNREVITAYSFYCRGQGNSIITPEGVLYDCDGLHHSIT  
KEEFYIHPRLIEVVRLQLQDHPKVSIIAEAFCCPKHFHFLEASGISLSQLHLQGTAATFALDPPLPMEKLLATIKKLYKKNSDPSLSNFIVTEA  
TLTNPELRLTQQDLGSHTTEITVEILDNLQNKETLSSA

>core/688/1/Org1\_Gene755

MKPQDLSPFLWKERRPCIQDGVLYVPRHYFEHQNFSTSYHQEFFQNHTSIACELCSGNGDWVVAQAQKDPQVLWIAVEQRFDRVR  
KIWSKMINHQIQNLRIVCGTAETFFQYVVPDQFLQRLVNFDPWPCKMRHRKHRLQPSFVQEISRLQDSAVFALATDDKTYLLESIE  
ALQTHLAPRMETPYIKMTDTYGNWFWENLWRTKGQEIFYTEFIKKAGI

>core/690/1/Org1\_Gene581

MTSWIELLDKQIEDQHMLKHEFYQRWSEGKLEKQQLQAYAKDYLLHIKAFPCYLSALHARCDDLQIRRQILENLMDEEAGNPNIHDL  
WRQFALSGLGVSEELANHEFSQAAQDMVATFRRLCDMPQLAVGLGALTYEIQIPQVCVEKIRGLKEYFGVSARGYAYFTVHQEADIK  
HASEEKEMLQTLVGRENPDVAVLQGSQEVLDLWNLSSFINSTEPSCSK

>core/692/1/Org1\_Gene513

MQTLARLFGQSPFAPLQAHLEMVVSCVEYMLPIFTALRDGRYEELLEMALVSDKEYQADCIKNDMRNHLPAGLFMPISRAGILEIISI  
QDSIADTAEDVAILLTIRRLNFYPSMETLFFRFLEKNLEAFELTMTLLHEFNQLLESSFGGRKADKARLLVGRVAKSEHESDVLQRELMQI  
FFSDDFIPEKEFYLWLQVIRRTAGISDSSEKLAHRINMTLEEK

>core/693/1/Org1\_Gene796

MSTTTVKHFIHTASRWEPVLKEIVASNYWHAQWINTLSFLENSGAKKISASEHPTEVKKEVLKHAAEEFRHGHYLKTQISRISSETSLPDYT  
SKNLLGGLLTKYYLHLLDLRTCRVLENEYSLSGQTLKTAAYILVTYAIELRASELYPLYHDILKEAQSKITVKSIILEEQGHLEMERELKDLPH  
GEELGYACQFEGELCLQFVERLEQMIFDPSSTFTKF

>core/696/1/Org1\_Gene823

MGQKGCPIGFRTGVTKKWRSWLWYGKQEFGKFLIEDVRIRQFLRKKPSCQGAAGFVRRMSGKIEVTIQTARPGLVIGKKGAEVDLLK  
EELRALTGKEVWLEIAEIKRPELNAKLVDNRIARQIERRVSFRRAMKKAMQSVMDAGAVGVKIQVSGRLAGAEIARSEWYKNGRVPL  
HTLRADIDYATACAETTYGIIGIKVWINLGENSSSTTPNNPAAPSAAA

>core/702/1/Org1\_Gene798

MQRIIIIGIDTGVGKTIVSAILARALNAEYWKPIQAGNLENSDSNIVHELSGAYCHPEAYRLHKPLSPHKAAQIDNVSIEESHICAPKTTSN  
LIETSGGFLSPCTSKRLQGDVFSSWSCSWILVSQAYLGSINHTCLTVEAMRSRNLNILGMVVNGYPEDEEHWLTQEIKLPIIGTLAKEKEI  
TKTIISCYAEQWKEVWTSNHQGIQGVSGTPSLNLH

>core/703/1/Org1\_Gene301

MNAVNTPKKILCIVADYREISPLIEQLDFTQINEHLYSYRCTDYHLDLYIVHVWGSTAVLNALQSYCQAYTDYDLWINPGFVGACSPCIPL  
GQCYTIEKIANLTDTTPVLSEDPPYIFDALPDSPKSSLVTSPVLYHYGFHKTFKLDMEGYAIASQAAEHHIPCSFLKITSDYTPGDGCPF  
SRLEEVSQKLTQTLVELLPELMERAIPPKLLPCP

>core/708/1/Org1\_Gene414

MIITIDGPSGTGKSTTAKALADHLHFNYCNTGKMYRTLAYARLQSPWATLPLTKFLEPPPSFTFATGQPLESFFNGHLLTSELTTQEVA  
NAASELSQLPEVRAFMQDLQRRYAQLGNCVFEGRDMGSKVFPNADLKIFLTSSPEVRAQRRLKDLPEGTLSPQLQAEVVKRDAADA  
QRAHDPLVIPENGIVIDSSDLTIRQVLEKILALLFRNEL

>core/709/1/Org1\_Gene291

MRKMLVLLASLGLLSPTLSSCTHLGSSGSYHPKLYTSGSKTKGVIAMLPVFHRPGKSLEPLPWNLQGEFTEEISKRFYASEKVFLIKHNAS  
PQTVSQFYAPIANRLPETIIEQFLPAEFIVATELLEQKTGKEAGVDSVTASVRVRVFDIRHHKIALIYQEIIECSQLTTLVNDYHRYGWNS  
KHFDSTPMGLMHSRLFREVVVARVEGYVCANYS

>core/710/1/Org1\_Gene702

MSKKPLYVAHPWHSPTLTQDNYESLCCYIEITPYDSVKFELDKATGLLKVDRPQKFSNFCPLYGLLPQTYCGTASGNYSGEQTRREGIQ  
GDKDPLDVCVLTEKNIHHGNILLQARPIGGLRIIDSGEADDKIIAVLEDDLVAEIEDISDCPGTVLDMIQHYFLTYKATPNHLLIKGSPAKIE  
IVGIYGKKEAQKVIQLAHEDYLSYIGDTAEVN

>core/720/1/Org1\_Gene557

MARYCGPKNRVARRFGANIFGRSRNPLLKKPHPPGQHGMQRKKKSDYGLQLEEKQKLKACYGMIMEKQLVKAFKEVIHKQGNVAQ  
MFLERFECRLDNMVYRMGFAKTIFAAQQLVAHGHLVNGRRVDRRSFFLRPGMQISLKEKSKRLQSVKDALESKDESSLPSYISLDKTG  
FKGELLVSPEQDQIEAQLPLPINISVVCEFLSHRT

>core/722/1/Org1\_Gene52

MSVQVKLTKNsFRLEKQKLARLQTYLPTLKLKKALLQAEVQNAVKDAAECDKDYVQAYERIYAFAEFSIPLCTDCVEKSFEIQSIDNDFE  
NIAGVEVPVIREVTLPASYSLLGTPIWLDTMLSASKELVVKVMAEVSKERLKILEEELRAVSIRVNLFEKKLIPETTKILKKIAVFLSDRSIT  
DVGQVKMAKKKIELRKARGDECV

>core/723/1/Org1\_Gene49

MANLNADGKLKQICDALRLDTLKPAEDEAAALLHNAKEQAKRIIQEAQEEARKILETAEERAHQKIKQGEVALSQAGKRALEALKQAVE  
NKIFRESLVEWLEHVTTDPEVSTKLIQALVQALEAQGVSGNLTAYIGKHVSPRAVNELLGKAVTTKLRRKSSVVVGSFVGGVQLKVEEKN  
WVLDLSSSALLEIFTRYLQKDFREMIFQGS

>core/724/1/Org1\_Gene570

MTYLASSIFSPEDFLYPEIISKAHYTWDILDLMQMLENHVFSGIHGTVESGVTLKNIEKIEAEDAYVESGAYIVGPCILGSQTEVRHGAY  
LRGNVITGSRVVGHCTEIKNSYLGHHTKAAHFAYLGDSVLSSEVNLGAGVRCANFRDGRNIYVRSTSDKSKIDTGRRKLGAFLGKG  
VAIGCNVVINPGQHILPHTRIRPGQVI

>core/727/1/Org1\_Gene460

MYDYIRGTLTYVHTGAIVIECQGIGYHIAITERWAIECIRALHQDFLVFTHVIFRETEHLLYGFHSREERECFRILISFSGIGPKLALAILNALP  
LKVLCVVVRSEDIRALASVSGIGKKTAEKLMVELKQKLPDLLPLDSRVETSQTHTTSSCLEEGIQALAALGYSKIAAERMIAEAIKDLPEGSS  
LTDILPIALKKNFSGVVKD

>core/730/1/Org1\_Gene193

MFIVIEGGEGSGKSSLAKALGDQLVAQDRKVLLTREPGGCLIGERLRDLILEPPHLELSRCCELFLFLGSRAQHIQEVIIIPALRDGYIVICERF  
HDSTIVYQGIAEGLGADFVADLCSKVVGPTPFLPNFVLLLDIPADIGLQRKHRQKVFDKFEKKPLSYHNRIREGFLSLASADPSRYLVDA  
RESLASLIDKVMLHTQLGLCT

>core/736/1/Org1\_Gene453

MLKLLKVSITGDLSSGKTEACQVFQELGAYVVSADEISHSFLIPHTRIGRRVIDLLGSDVVVDGAFDAQIAAKVFYNSVLLQGLEAILHPE  
VCRIIEEQYHQSIQDGNYPFVAEVPLLYEIHAKWFDVILVMANEDIRRRERFMKKTGRSSEDFDQRCRFLNVEEKLAQADVVENN  
GTKKELHQKIEEYFYALKGAL

>core/740/1/Org1\_Gene215

MTRYPDYLSKLIFFLRKLPGIGFKTAEKLA FELISWDSEQLKILGNAFHNVASERSHCPLCFTLKESKEADCHFCREERDNQSLCIVASPKD  
VFFLERSKVFKGRYHVLGSLSPITGKHIENERLSILKSRIETLCPKEIILAI DATLEGDATAFLKQELQHFSVNISR LALGLPIGLSFDYVD SG  
TLARAFSGRHSY

>core/742/1/Org1\_Gene503

MRLFSLGTIYLFSLALSSCCGYSILNSPYHLSSLGKSLLQERIFIAPIKEDPHGQLCSALTYELSKRSFAISGRSSCAGYTLKVELLNGIDKNIG  
FTYAPNKLGDKTHRHFIVSNEGRLSLSAKVQLINNDTQEVLDQCVAESVDFDFEPDLGTANAHEFALGQFEMHSEAIKSARRILSIRLA  
ETIAQQVYYDLF

>core/743/1/Org1\_Gene915

MNWVPKTIDHVDPESEIDIRKVVSCYKLIKEQPEFRSLISELLGVIRCGLRLLKRSKYKEQARTVSEDEDAPLFCLTRSYYQDGYLTPLRAG  
PRDLINHYIHLRRRENPKHFFSPKHPCYYARLAFNESVCVYRELFDIERLTMYVEGDYSKEQEKNLQAILSFKTLDEGKDFLIEHKDTDL  
IGRGFTDVFCT

>core/744/1/Org1\_Gene726

MRIALLSLLMIFPIFGEESRPGSEDGNSNTQEIVGSQDTQVCLYHSYEQGLQASRIEGKPLVIVVLCNSGDDGQACTIGLSETCEEVLS  
VLGSIFSELANFVVLVPSGVNPLIYPPIEDPILAEIVKFELFKDESFTGLSIIVVGVTPEGPGDIIEVSPVSLTVEEEETLPSEQTTEVESTSE  
LQSEDPAIA

>core/749/1/Org1\_Gene312

MFRRTGKGPFEDVQTLYEEETSSPSSYSPYSRSERPETPPSLFDNPKASEARPLNHNLTTEESSLPQWSSTPRTESLLPLEEPETTLGEGVTF  
KGELAFERLLRIDGTFEGILVSKGKIIIGPKGVVKADIQLQEAIIEGVVEGNITVSGKVELRGGAIKGDIIQANTLCVDEGVRLGYLAIGIT  
DHSERERDL

>core/750/1/Org1\_Gene790

MAYGTRYPTLAFHTGGIGESDDGMPPQPFTFCYDSALLQAKIENFNIVPYTSVLPKELFGNIVPVDTCVKSFKHGAVLEVIMAGRGAA  
LSDGTHAIATGIGICWGDKNGELIGGWAAEYVEFFPTWINDEIAETHAKMWLKKSLQHELDLRSIAKHSEFQFFHNYINIKQKFGFCL  
TALGFLNFENAEPKVN

>core/754/1/Org1\_Gene185

MKRYVVGISGASGVILAVKLIKELVNAKHQVEVIISPSGRKTLYYELGCQSFDALFSEENLEYIHTHSIQAIESSLASGSCPVEATIIIPCSMTT  
VAAISIGLADNLLRRVADVALKERRPLILVPRETPLHTIHLENLLKLSKSGATIFPPMPMWYFKPQSVEDLENALVGKILAYLNIPSDLTKQ  
WSNPE

>core/755/1/Org1\_Gene663

MKVIYYEIEEIPSTNTMAKSYMHLWDPYALTVISTKCQTAGTGKFGKSWKSSKGDLLNTFCFFITDLHIDVSRLFRLGTEAVVALCKDLGI  
TEAKIKWPNDVLVHGEKLCGVLPETLPVEGLLGVVLGIGLNGNTTKQALKDVGQPATSLQEILGHPIDLETTRELLIHHLLGVLQENLPDS  
LATKSNRGN

>core/758/1/Org1\_Gene35

MIKKFFIYSLIFSCSFSAPLKGICNEDVSSQSRIEEDPEVLITQLNELIETPIEEGKEIRNELQAISDGQKSSEEIEESCGTSDSEGLSEKTDKES  
NEYVLDFFDMSMVQRLEGISKMCQSGQVAQIIDCFNREFDIRNRELELKNRELELREKDLEFKKSILDWNKEKVSRELAFAQREQDIKQTL  
LLKK

>core/759/1/Org1\_Gene285

MSIKEDKWIREMALNADMIHPFVNGQVNVNEETGEKLISYGLSSYGYDLRLSREFKVFTNVVNSVDPKCFTEDIFISITDDVCIVPPNS  
FALARSVEYFRIPRNVLTMCIGKSTYARCGIIVNVTPFEPEWEGHVTIEISNTTLPKAIYANEGIAQVLFFESSTTCEVSYADRKGYQKQ  
QGTVPCV

>core/760/1/Org1\_Gene684

MVRVSTSEFRVGLRIEIDGQPYLILQNDFVKPGKGQAFNRIKVKNFLTGRVIERTYKSGESVETADIVERSMRLLYTDQEGATFMDDETF  
EQEVVFWEKLENIRQWLLEDTIYTLVLYNGDVVAVEPPIFMELISIAETAPGVRGDTASGRVLKPAVTNTGAKIMVPIFIDEGELVKVDTR  
TGSYESRVSK

>core/762/1/Org1\_Gene987

MMKIPYARLEKGSLLVASPDINQGVFARSVILLCEHSLNGSFGLILNKT LGFEISDDIFTFEKVSNNHNRFCMGGPLQANQMMLLHSCSE  
IPEQTL EICPSVYLGGDL PFLQEIASSES GPEINLCFGYSGWQAGQLEKEFLSNDWFLAPGNKD YVFYSEPEDLWALVLKDLGGKYASLS  
TVPDNLLL N

>core/766/1/Org1\_Gene447

MRILAGKYKGKSLKTF SNPHIRPTSGLVKEAFFSICREDIEGA AFLDLFAGMGAIGFEALS RGAASVVFVDISIKAIQLIHTNSALLGEQLPV  
VIFRQDAQSAIQRLIKQKRSFDLIYIDPPYELCNCYVETLLQKIVSGN ILNPEGTLFLENASDEE IACEGLTLRRRRKLGKTYLA EYIVEKDP

>core/768/1/Org1\_Gene865

MELVVTSRETGKKSFLKKIRQQGGIPAVVYSAGKSLANITVDALVFKKFLSNLESGALSSTVFSLSYEGRII KALVKDIQYQITTYDVIHLDFE  
ELVEDRPVKLNIPIRCINAVDCIGVKLGGS LRQVIRAVRVCKPKDIVPFLELDVRSVGLSQTRKLS DIKIPAGIETITPLKEVAITVSRR

>core/770/1/Org1\_Gene121

MVLSSQLSVGMFISTKDGLYKVTSVSKVAGPKGESFIKVALQAADSDVVIERNFKATQEVKEAQFETR TLEYLYLEDES YLFLDLGNYEKL  
FIPQEIMKDNFLFLKAGVTVSAMVYDNNVFSVELPHFLELMVSKTDFPGDSL SLSGGVKKALLETGIEVMVPPFVEIGDV IKIDTRTCEYI  
QRV

>core/771/1/Org1\_Gene360

MTDTPPENEEQHESNVQNENEVEHLQQEIVTLKTELKEKNDKYLMALAESENSRKRLQKERQELMQYALENTLIDFLNPIESMEKALG  
FATQMSDDVKNWALGFNMILNQFKQIFEEKGII EYSSIGQKFNPFLHEAVQTEETSEVPEGTILEEFAKGYKIGERPIRVAKVKVAKAPTP  
KENKE

>core/772/1/Org1\_Gene611

MAAKTKTLELEDNVFLLLEG NLKRIFATPIGYTT FREFQNVVFN CANGQQEIANFFFEMLINGKLTQELAPQQKQAAHS LIAEFMMPIR  
VAKDIHERGEFINFITS DMLTQQERCIFLNRLARVDGQEFLLMTDVQNTCHLIRHLLARLLEAQKNPVGEKNLQEI QEEITSLKNHFDELT  
KALQ

>core/773/1/Org1\_Gene420

MVETVLHNFQRYLSKYLYRVFRFPCRKKTFLLSSHRVLARPSFPVDYCPGKIYDLQEIYEELNAQLFQGALRLQIGWFGRKATRKGKSVVL  
GLFHENEQLIRIHRSLDRQEIPRFFMEYLVYHEMVHSVVPREYSLSGRSIFHGKKFKEYEQRFPDYDRAVAWEKANAYLLRGYKKRVGG  
GYGRA

>core/776/1/Org1\_Gene472

MSRKAREPILLPQGVEVSIQDDKIIVKGPKGSLTQKSVKEVEITLKDNSIFVHAAPHVVDRPSCMQGLYWALISNMVQGVHLGFEKRLE  
MIGVGFRASVQGAFLDLSIGVSHPTKIPISTLQVSVEKNTLISVKGLDKQLVGEFAASIRAKRPPEPYKKGIRYENEYVRRKAGKAAKT  
GKK

>core/777/1/Org1\_Gene41

MYKWYVVQVFTAQEKVKKALEDKFESSGMTDFIQEIILPIENVMEVKKGEHKVVEKYIWPGYLLVKMHLTDESWLYVKSTAGIVEFL  
GGGVPVALSEDEVRSILTDIEKKSGVVQKHQFEVGSRVKINDGVFVNFIMGVSEVFHDKGRLSVMVSIFGRETRVDDLEFWQVEEVA  
PGQESE

>core/782/1/Org1\_Gene474

MSRLKKFYTEEIRKSLFEKFGYANKMQIPVLKKIVLSMGLAEAAKDKNLFQAHLEELTMISGQKPLVTKARNSIAGFKLREGQGIGAKVT  
LRGIRMYDFMDRFCNIVSPRIRDFRGFSNKGDRGCYSVGLDDQQIFPEINLDRVKRTQGLNITWVTTAQTDDDECTTLELMGLRFKK  
AQ

>core/786/1/Org1\_Gene658

MTTPQSPGSLSQSHLPHPHDPWDTEPTSLPEDPNDKASQELHSLVHLFRKLSIHLSEVEKTVQQLKPDLLELALLICEKFLYKKLENPQE  
LALLSTALQRHTTLRSLTPIKVFLHPEDLKLTDWISTHELPMIKHAEFFPDTSCRRSGFKIETPNGILRQEISEELDHLHSVLT

>core/787/1/Org1\_Gene407

MACEQHEGCELEEREIEIEDIKSDTKWVSITQAAKLHNVTRQAIYVAIKQKKLKASKETRWEIDIKDLEEYKRNRYSRKKSLEYQGELVFD  
NGKGCYSINQVAQILGIPVQKVYYATRTGTIRGERKGAAWVIHVSEIERYKNEYLSKQAAKKLKGAEPKEHQAPNFEPPTEIFPESN

>core/789/1/Org1\_Gene794

MTIILCGLPTSGKSSLGKALAKFLNLPFYDLDDLIVSNYSSALYSSSAEIYKAYGDQKFSECEARILETLPPEDALISLGGGTLMYEASYRAIQ  
TRGALVFLSVELPLIYERLEKRGLPERLKEAMKTKPLSEILTERIDRMKEIADYIFPVDHVDHSSKSSLEQASQDLITLLKS

>core/791/1/Org1\_Gene396

MDRDNEVPLPKPKWIYRTGIGQDSHRFLPESSTKPCILGGIIFDHCPGFQANSDDIIFHAICNAISSVTNKIILGKVADELLQTRGITDSGI  
YLEEALKSLKPNQKISHVAITIEGSRPKFLCKLSALRQNIQVMNLTPTDIGITATSGEGLSDFGCGDGVQCFCVLTVMHEYCD

>core/793/1/Org1\_Gene662

MGYVFYVIAGSIFLGISLGAYCQLYYSVKSVLFSWYLLTVYALEKRHALLALSQLVGEEDAQSQKEIDFLSQCDKLSWRAFLKNSYEIIPTFK  
EMEDLLSERVQGFLESJETIAEHDRILCIENFWASKNLFDFEIAAYEEAVEKYLKLRQRAPLRLASKLFRFLDVPSIRFSS

>core/795/1/Org1\_Gene991

MSSTLNGVFPSSLPEESADLFITNKEIVALGEKGNVFLTHSIPMHIAAITILVIVAPAGIAIICLGCYSQSILLIAGVIVLTILTLLCLQALVGFIK  
FIRQLPQQLHTTVQFIREKIRPESSLQLVTNAQRKTTQDTLKLYEELCDLSQKEFKLQSTLYQKRFELSHKNEKTNQN

>core/800/1/Org1\_Gene783

MSHLNYLLEKIAASSKEDFPFPDDLESYLEGYVPDKNIALDITYQKIFKISSEDELEKVYKEGYHAYLDKDYAKSITVFRWLFFNPFVSKFWF  
SLGASLHMSEQYSQALHAYGVTAVLRDKDPYPHYAYICYTLTNEHEEAKELEMAWVRAQHKPLYNELKEEILDIRKHK

>core/805/1/Org1\_Gene216

MKKLLFSTFLLVLGSTSAAHANLGYNLKRCEESDLGKKETEELEAMKQQFVKNAEKIEEELTSIYNKLQDEEDYMESLSDSASEELRKKF  
EDLSGEYNAYQSQQYYQSINQSNVKRIQKLIQEVKIAAESVRSKEKLEAILNEEAVLAIAPGTDKTEIIAILNESFKKQN

>core/806/1/Org1\_Gene80

MSEVKPLFLKNDSDLATQRFQNLINMLQEQAIEYNEYEEKNARVQNEIKEQKDFVKRCIEDFEARGLGVLKEELASLTRDFHDKAKAE  
TSMLEPCIGFYYSIHQEEQRQRQERLQKMAERYRDCKQVLEAVQVEQKDMISSRVVDDSYFEEEEKQKVDNRKKEQD

>core/810/1/Org1\_Gene732

MKQQLLLLEDVDGLGRSGDLITARPGYVRNYLIPKKKAVIAGAGTLRLQAKLKEQRLIQAAADKADSERIAQALKDIVLEFQVRVDPDN  
NMYGSVTIADIIAEAAKKNIPLVRKNFPHAHYAIKNLGKKNIPLKKEEVTATLLVEVTS DNEYVTVLAQGKQTEENQEG

>core/815/1/Org1\_Gene534

MAKYPLEPVLAIKKDRVDRAEKVVKEKRRLLIEIEQEKLEKEAERDKVKNHMQKIQQLRDLLDEGTTSDAVLQIKSYIKVVAVQLSEEE  
EKNVKQKEVVLAASKELEKAEVNLAKRRKEEEKTRLHKEEWMKEALKEEARAEKEQDEMGLLFQLRQKKKRESGGS

>core/816/1/Org1\_Gene251

MAVEQSHIKEEIEKLIGKAIKRVCGNKENDLCRYLPGPSGGYMHFTLKKMKSAAPEQLLMLKTFILESETPR TINPKPRAPRGSKRR  
DFINFTKTDIERVLELARQVGDKDLLARFSPKKPLTSLKRELIRSIRNGIVSVELWNAYVEAVKAVSSPNLEVTSPFV

>core/820/1/Org1\_Gene281

MSRQNAEENLNFAKELKLPDVAFDQNNTCILFVDGEFSLHLYEEHSDRLYVYAPLLDGLPDNTQRKLALYEKLLGSM LGGQMAGG  
GVGVATKEQLILMHCVLDMKYAETNLLKAFAQLF IETVVKWRTVCADICAGREPSVDTMPQMPQGGGGMQPPPTGIRA

>core/829/1/Org1\_Gene299

MTTWTLNQNNLTFLKSSDEEPFLERESGLTYINIQANGNELPLFFVIRSEGEILQLICYLPYQLHESHKASTARLLHLLNRDIDIPGFGMD  
EEQGLIFYRLVLPCLNGEIHDTLLRIYIDTIKLVCDSSFSAIGLISSGNMNLDELRRQALQEQQEKRNE

>core/831/1/Org1\_Gene758

MATLSPEKFSGSPISISKEFPQQKMREILQMLYALDMAPSAEDSLVPLMSQTAVSQKHVLVALNQTKSILEKSQELDLIIGNALKNKSF  
DSL DLVEKNVLR LTLFEHFYSP PINKAILIAE AIRLVKKFSYSEACPF IQAILNDIFTDSSLNENSLSI

>core/839/1/Org1\_Gene366

MTQE KIKIHVSNEQTCIPIHLVSVEKLVLTLEHLKVTTNEIFIYFLEDKALAE LHDKVFADPSLTDTITLPIDAPGDPAYPHVLGEAFISPQA  
ALRFLENTSPNQEDIYEEISRYLVHSILHMLGYDDTSSEEK RKM RVKENQILCMLRKKHALLTA

>core/842/1/Org1\_Gene241

MRIIRFDPYGALSAQSI AKDSRQNSPLVEKISEE IATNEAIRLALLAIGDREQEKKQRHRYKLLGQKQAKVLLSQLRHVHLDFKKLYCDSK  
KKEDQE KDEKNKQKRSIKVT KKKKGISLGAAASQAIAAAAEAWVIARNKGVLETASTLFYQKDEEA

>core/843/1/Org1\_Gene721

MEKQNLKLDVKEIEFPETVFSRDIETRVIQVIILHCLAKINGVSLLGGNLIDALFGRDIERMKG IYVEQDSKNHLVKVRVEVNVVDYGVSIPE  
KTEEIQGCIVSEISEYTGLHVAAVHVIIKGLTQPKDRIDEEIEEEVSVQDLPSPEDFLLENSEG

>core/890/1/Org1\_Gene599

MKYRFTEEIEEEPLVNLTP LIDIVFVILMAFIVAVPLIKLDSIALAPGTQE QEVLSSENDSIAVIKVFADHSLTLNEHPITLQELTVRLTLLHKA  
YPEKTPLLLQDGETSFRTYQNVKNAIEAAGFHELHVALQN

>core/892/1/Org1\_Gene577

MIAIERYQLISKFRMWLFLGCSVEERHFKQPVLSVTFSYNEVPSACLSDKLSDACCYLEVTSLEEIANTKPYALIEHLANELFDSLVISFG  
DKASKIDLEVEKERPPVPNLLNPIKFTISKELCPSPVLSA

>core/894/1/Org1\_Gene473

MGMTSDSIADLLTRIRNALMAEHLVVDVEHMKMREAIVKILKHKGFFVAHYLVKEENRKRMRVFLQYSDDRKPVIHQLKRVSKPSRRV  
YVSAAKIPYVFGNMGISVLSTSQGVMEGSLARSKNIGGELLCLVW

>core/900/1/Org1\_Gene292

MRDHAFSKLIGTVRAMVVEGRCPWSLQQSLVSMVEHILGECQEFHEAVLQGKTVQEVGSEAGDVLTLVLILCFLLEREGVLASEDVAN  
EAMEKLRRRAPYIFAEDYKPVSIIEADRLWELAKHREKNEST

>core/903/1/Org1\_Gene45

MTTESLETLVEKLSNLTVLELSQLKKLLEEKWDVTASAPVVAVAAGGGGEAPVAAEPTFAVTLEDVPADKKIGVLKVVREVTGLALKEA  
KEMTEGLPKTVKEKTSKSDAEDTVKKLQDAGAKASFGL

>core/904/1/Org1\_Gene594

MKFTVALFGAEKGSYDTAYFCRSLVDLHNYLGDVSSPGITLAIKTLSDYNVVYFRVREEGYCVDSYFFGLHFLNTQTTLKNIIAIGLPV  
GNQHIIASRSLCQKHNSLLLFFDHDLYDLLTFNQPF

>core/906/1/Org1\_Gene154

MLIGRYSSDDQFTEATKNTPTIIKLGFVRDNLEGLTNPISIVSETSSSIKDSVLRSLPILGSILGCARLYSTLSTNDPLDETQEKIWHITIFGAL  
ETLGLGILILLFKIIFVILHCIFHLVIGFCK

>core/908/1/Org1\_Gene383

MPLSDDEIEQFKRLLMKAKLSHTLEGNAQEVKKPNEATGYSQHQADQGTDTFDRITISLEVTTKEYELLRQINRALEKINESSYGICDV  
SGEEIPLARLIAIPYATMTVKAQEQFEKGLLSGN

>core/912/1/Org1\_Gene623

MKRQKRKQSITLIEMMVVITLIGIGGALAFNMRGSIHKGVFQSEQNCAKVYDILMMEYATGGSSLKEIIAHKETVVEEASWCKEGRK  
LLKDAWGEDLIVQLNDKGDDLVIKRVQSSNKK

>core/913/1/Org1\_Gene656

MRDRLGSLSLILKVHKYLDLHNQKRLALTVSRNIQATNKRIADLHLERYEHFISRDNIKHYDILLEYLKTLQSSLYKQQSESRLFLEIHHQ  
QLQELINRRKIIEKIKNNKYSKDQEIGT

>core/917/1/Org1\_Gene226

MEIIHIGTDIIEISRIEAIATHGNRLNRRIFTEAEQKYCLEKTDPIPSFAGRFAGKEAVAKALGTGIGSVVAWKDIEVFKVSHGPEVLLPSH  
VYAKIGISKVILSISHCKEYATATAIALA

>core/918/1/Org1\_Gene74

MVNLLKELEQEQCRNDLPEFHVGDITRLATKISEGGKERVQVFQGTVMARRGGGSGETVSLHRVAYGEGMEKSFLNNSPRIVSIEIVKR  
GKVARARLYYLRGKTGKAAKVKEFVGPRSSKK

>core/922/1/Org1\_Gene231

MTENRRRIKRVNALLQEAIKVKDKVHKPKISNLWITVTRVSLSKDLHSARVYVSVMPHENTKEEALVKVSAGFIAHRASKNVVLKYF  
PELHFYLDLIFSPQDYIENLLWQIQEKEKS

>core/930/1/Org1\_Gene368

MSDIQKEEHGSTTIFHLHGKLDGISSPEVQENISQSLAAGSKNIILDCAHLDYMSSAGIRVLLQSYHQVGQHSGKIVLTTVPKTIEQTLVY  
TGFLSYFKIFNTVDEAIQTLNKDGD

>core/933/1/Org1\_Gene286

MSKVSVRKKNWGFRLLEEVMIKSWWVIFSILIGGFVYDRAIQELRTEELRLQSKVSSLCQDILSAQEKQRQLQLHLQHWQDSAAIEAAL  
IQRGLIPKGYKKLCVSPKQQSENKD

>core/936/1/Org1\_Gene730

MGKKENQLYEGAYVFSVTLSEEARRKALDKVISGITNYGGEIHKIHDQGRKKLAYTIRGAREGYYYFIYFSVSPGAITELWKEYHLNEDLL  
RFMTLRADSVKEVLEFASLPE

>core/938/1/Org1\_Gene479

MFKATARYIRVQPRKARLAAGLMRNLSVQEAEELGFSQLKAGRCLKKVLNSAVANAELHENIKRENLSVTEVRVDAGPVYKRSKSKS  
RGGRSPIKRTSHLTVIVGEKER

>core/946/1/Org1\_Gene695

MNLSAKEYGDIIVIYLQGS�DAVSVPVQEQYLEQFIQKKHLKIALNFTDVSYISSAGIRLLLSNFKLVQSLGGKMCLCCVKESVTEVMRIAG  
LDQLILLCQSEQECLSKL

>core/949/1/Org1\_Gene20

MNEPTRTYLESEKDTQDQIEELQATCIVKNAAGIHVRPAGVIVRLFDGEPDVFHTYAGKTINAKSIMSILMLGAPQGGEILVTIRSKEA  
HRILQKIQDAFSSGFGEI

>core/954/1/Org1\_Gene395

MEPYAVIQTGSQYQVRSGDVIDVELLGEVASDKEVIFQDVLVFDGTKASLGSP TIANAQVKAEYLSHVKG EKVVAYKYKKRKNYHRK  
HGHRQKYLRVKIREILI

>core/955/1/Org1\_Gene545

MSFTYFLALPVDRLMQERFLCSPKRWAPFINSPLYLTLIADHDTPYLAKNLDKFPLPVEQWEKTVLHVSSLLKSIFLCSDLSSLRLLACTKF  
EILTLDLYCAQNI

>core/956/1/Org1\_Gene428

MNERTLLLLLKKKGLFLAILDLTQTESSLTTPLEKVLKQKKIFLSCIDRVLDLQIKEFRHAFSSSELPQDIQEELEEIRDVIIRILDTDKRNYAQK  
KKEFGIYERP

>core/959/1/Org1\_Gene436

MSFKRFLQQIPVRICLLIYLYQWLISPLLGSCCRFFPSCSHYAEQALKSHGFLMGCWLSIKRIGKCGPWHPGGIDMVPKTALQEVLEPY  
QEIDGGDSSHSE

>core/965/1/Org1\_Gene2

MEQFHLDREEILLAKASALQLSEELIQEYQTSLSAVITSMKEALAIEIDDADSCESLFMHVVNVEDLREDSVTSDFNREEFLRNPESLG  
GLVKVPAVIK

>core/968/1/Org1\_Gene303

MATMTKKLISTISQDHKIHPNHVRTVIQNFLDKMTDALVKGDRLEFRDFGVLQVVERKPKVGRNPKNAAVPIHIPARRAVKFTPGKR  
MKRLIETPNKHS

>core/976/1/Org1\_Gene77

MIKKDRFTNEKLNKLFDSPFLVNIAIKQAKIKIAKGDVRSSNVAIETLVLLDREGIQPEFTEEIVVTASPTVERKRSEHTNSRKKDPSAYT  
WSDVK

>core/978/1/Org1\_Gene21

MGSGYAKKKKEAKIMEQQFLEMEASLLEKRYEGQAGNGLVSVVINGKCDLISVKVQPTCLDPEDPEVIEDLFRAAFKLAKEQMDQEM  
SLMRSTMPF

>core/979/1/Org1\_Gene307

MNKSRLRLCCCLFCGSLFYFYINKQNSLTKLRLEIPCLSVRLRQLEQQNISLRFIDKIERPDHLMEDIAALPEYQYLEYPSEESISLLSYELP

>core/982/1/Org1\_Gene451

MLIRLFLGISLPKGFPLYLEPPLVLATFQGTQFVGTYSEATNPLYIDNLNLNYHYTQELLYKAVPCNYKSIYREIPLIIFPEVLIGSTPTQSTE

>core/988/1/Org1\_Gene260

MAKLVITSDDEQQEFELEDNSEIAEPCESMGIPFACTEGVCGTCVIEVLEGRENLSEFTEPEYDFLGEPEDSNERLACQCRIKGGCVKVTF

>core/992/1/Org1\_Gene239

MSRKCPLTGKRPRRGYSYTLRGIAKKKKGIGLKVTGKTKRRFFPNMLTKRLWSTEENRFLKLIKISASALRHIDKLGLEKVLERAKSKNF

>core/994/1/Org1\_Gene116

MKEYLDFLVQRNVERDPQTKRHCTVSQKFGGESIDAKTTTGQLFHIAGKTEPGHGKLC LGESILKQLLALGIITGYENREREVWVYLD

>core/997/1/Org1\_Gene724

MKSEFKLLPFLSVILCCGNLLSSPRRAISVTESIGMSAVKTLVLSEKAHEFLEGIGYGVGASSILRDWQTQQWLEIESLLAQNEVM

>core/998/1/Org1\_Gene477

MASEPRGSRKVKIGVVVSAKMEKTVVVRVERIFSH PQYLKVVRSSKKYYAHTELKVSEGDKVKIQETRPLSKLKRWRVIEHVG VVS

>core/999/1/Org1\_Gene812

MVEIHHKDP SLKKLFALQQSLET LNSLSDIVATYEAMFSLIYEGLNKALRKDQLCYLLSVNSKGELLKSPSGDP IVQTFPIHPHH

>core/1000/1/Org1\_Gene538

MATNKSCTAFDFNKMLDGVCTYVKG VQQYLTELETSTQGTVDLGTMFNLQFRMQILSQYMESVSNILTAVNTEMITMARAVKGS

>core/1003/1/Org1\_Gene40

MKQQHNRKALSRKIGTVKKQAKFAGSFLDEIKKIEWVSKHDLKKYKVV LISIFGFGFAIYFVDLVLRKSITCLDGITTFLFG

>core/1004/1/Org1\_Gene539

MFNMENTAKEEKNSQPLLDLEQDMQDHDRAQELKASVQDKVHKLHALLREGSDKESFGQQQSLLAGYVALQKVLGRINRKMI

>core/1009/1/Org1\_Gene211

MSLEDDVIAIIVEQLGVDPKEVNENSSFIEDLNADSLDLTELIMTLEEKFAFEISEEDA EKLRTVGDVFTYIKKRQAEQ

>core/1012/1/Org1\_Gene547

MKEFLAYIIKNLVDRPEEVRIKEVQGTHTIIYELSVAKPDIGKIIGKEGRTIKAIRTLLVSVASRNNVRVSLEIMEEK

>core/1014/1/Org1\_Gene590

MNEGIHSVCFQKTPRLTAKSVVSMEMLLTTQQLPSAEGMPSVANLEADFLRAEALLAEMREIRGCLEQSLRTLVPSE

>core/1015/1/Org1\_Gene769

MKNKIVTLLDQLYEDQESRLQKLGEIVPNLTPEDLLQPMDFPQLEGNPAFRFEEGVLSGIGEVRAAILAALSQEN

>core/1018/1/Org1\_Gene552

MFFAPLLYESLRRGLMHPTSHMQQLARLEFINDQLTTELEHVNELLCSLGFPEGLTTIKAIAEEVLSDDDEPLLD

>core/1019/1/Org1\_Gene858

MEEVPFENAMQRLEEIVDLMNQPTTSLDASLALYEEADALMRICESRIRQVEQRVRELAEKREHSSLFEEQAVVR

>core/1021/1/Org1\_Gene38

MAKKEDTLVLEGKVEELLPGMHFRVILENGMPVTAHLCGKMRRMSNIRLLVGDRVTVEMSAYDLTKARVVYRHR

>core/1023/1/Org1\_Gene985

MSYKITLPKADETTAKKVTKISEASTLIFSVLKEKASLGNVHGFCQAENSLSV EANKIISVAENTLAGCFCK

>core/1025/1/Org1\_Gene951

MAAKKDLLTQLRGKGDDDDLDAYVHENKKALFALRAENLLQNKVVKVHMFSTHKKNIARALTVKQERKGKVHG

>core/1028/1/Org1\_Gene498

MKKLIALIGIFLVPIKGNTNKEHDAHATVLKAARAKYNLFFVQDVFPVHEVIEPISPDCLVHYEGWV

>core/1034/1/Org1\_Gene348

MIKQACKFYLLQCLLCALYWLLKYCRKLLKGTLLHHSEETLYQALLSSLIDLLYQLKQLPAPTNE

>core/1046/1/Org1\_Gene953

MSIALNREEVWDNPRHLMFILMQFQQFSGEQDRFGSFLEATIRDRVSFLVLQEKIATLK

>core/1056/1/Org1\_Gene932

MIDAENQNPKDGGSFSTSLHTDPKNLFDEEGMPSPSDLQCDLNNVFIFIKSMFF

>core/1058/1/Org1\_Gene365

MSRHRSYGKSVKGVTKRNVLKRFERVEVLRKLGRWWDSTAKKVTGLPKTPILK

>core/1059/1/Org1\_Gene177

MASKNREIIKLKSSSESDMYWTVKNKRKTTGRLELKKYDRKLRRHVIFKEAR

>core/1067/1/Org1\_Gene787

MFFIAVRSRGFLDIHGILAARKGKQVVKSTAGAWIGSRGAVFYSLVS

>core/1068/1/Org1\_Gene984

MSESLEIPELTEVLSEQPSLSTPDSPPKVITGTLTLTYFQEDIDPAS

>core/1070/1/Org1\_Gene717

MKRITYQPSKRKRNRNSVGFRTRMATRNGRKLLNRRRRRHGRHSLVDL

>core/1073/1/Org1\_Gene1014

MSSVKKKRRLKIAKHKRKKRRRRDRHKNK

>core/158/2/Org2\_Gene129

MELLSLNKSYFEIQLRLYRPEILTLETIRSKHIQETSSPPSPPELQKHIPNLCRIPEVSIYTEQETSSKPLKIGVLLSGGQAPGGHNVVIGLF  
DALRVFNPKTRLFGFIKGPLGLTRGLYKDLDISVIYDYNNMGGFDMLSSSREKIKTEEQKKNILNTVKQLKLDGLLIIGGNNSTDTAMLA  
EYFLAHNCKTSVIGVPKTIDGDLKNCWIETSLGFHTSCRTYSEMIGNLAKDALSAKKYHHFIRLMGQQASYTTLECGLQTLPNIALISELIA  
TRKISLKQLSEQLALGLVRRYKSGKNYSTVLIPEGLIEHIFDTRKLIDELNVLLANGDSSIEKILSKLSPETLKTFFHLPKDIANQLLLARDSHG  
NVRVSKIATEELLAVMVKKEIEKIKPHMEFHSVSHFFGYEARAGFPSNFDNYGIALGIISALFLVRQKTGYMITINNLAQSYTEWQGGGA  
TPLYKMMHLENRCGTETPVIKTDSDVPKSPAVQHLLQQSDSCLVEDLYRFPGLQYFGKEELIDQRPLTLLWENQTHSPFQALYSTSGK  
RSL

>core/176/2/Org2\_Gene914

MPGSVSSPPLSPVIVRERVSSSGSDLIQPHAVLKISILIFALVTILGIVLVVLSALGALPSLVLTVSGCIAIAVGLIGLGILVTRLILSTIRKVDA  
MGYDAAVKEEQYLSRIRELESENREIRDRNRAVEDQCAHLSEENKDLRDPEYLHGMTERLIASLEIENQALVAENILLKDOWNASLSRDFR

AYKQKFPLGALEPWKEDIACIMEQNLFLKPECIAMVKSLETPLETQRLFLYPKGFQSLVNRFAPRSRFFQTPKYEYNSRNENEDGKVAAVC  
ARLKKEFFSAVLGACSYEELGGICERAVALKETLPLPEAVYDTLVQEFPNLLTAESLWKEWCFYSYPYLRPYLSVDYCKRFLVQLFEELCLK  
LFTTGSPEDQALVRLFSYYRNHIPAVLASFGLPPPETGGSVFVLLPKQENLLWSQIEVLATRYLKDTFVRNSEWTGSFEMMFYSYNEMCK  
EISEGRIRFAEDYETRHSEEFPPSPLSEEGEGEEFLPPCSEEEVSVLERPDLDVDSMWVWHPPVPKGPL

>core/20/4/Org4\_Gene980

MYSCYSKGISHNYLLHPMSRLDIFVFDSLIANQDQNLLEEIFCSEDTVLFKAYRTTALQSPLAAKNLNIARKVANYILADNGEIDTVKLVD  
AIHHLSQCTYPLGPHRHNEAQDREHLLKMLKALKENPKLKESIKTLFVPSYSTIQNLIRHTLALNPQTILSTIHVRQAALTALFTYLRQDVG  
SCFATAPAILIHQEYPERFLKDLNDLISSGKLSRIVNQREIAVPINLSGCIGELFKPLRILDLYPDPVVKLSSSPGLKKAFSAANLIETLGDSEA  
QIQQLLSHQYLMQKLQNVHETLTANDIIKSTLLHYYQLQESTVRAIFFKEGLFSKEQVAFSTQHPRELSEIQRVYHYLHAYEEAKSAFIHD  
TQNPLLKAWEYTLATLADASQPTISNHIRLALGWKSEDPHSLVSLVTHFVEEEVENIRILVQQCEQTYHEARSQLEYIEGRMRNPLNNQ  
DSQILTMDHMRFRQELNKALYEWDSAQEKAKKFLHLPEFLLSFYTKQIPLYFRSSYDAFIQEFALHYADAPAGFRILFTHGRTHPNTWSP  
IYSINEFIRFLSEFFTSTESSELLGKHAVINLEKETSRLVHNITAMLHTDVFQEALLTRILEAYQLPVPPSILNHLQDLSQTPWVYVSGGTVD  
LLLDYFESSEPLTLTEKHPENPHELAIFYADALKDLPTGIKSYLEEGSHLLSSSPHVFSSIIAGSPLFREAWDNDWYSYTWLRDVWVKQH  
QDFLQDITLPQPSIYAFIENFCNKYALQHVVHDFHDFCSDHSLTLPELYDKGSRFLSSLFTKDKTVALIYIRRLLYLMVREVPYVSEQQLPE  
VLDNVSSYLGISSRITYEKFRSLIETIPKMTLLSSADLRHIYKGLLMQSYQKIYTEEDMYLRLTTAMRHHNLAYPAPLLFADSNWPSIYFG  
FILNPGTTEIDLWKFNAGLQGQPLDNIQELFATSRPWTLYANPIDYGMPPPPGYRSRLPKEFF

>core/67/4/Org4\_Gene970

MLLLISGALFTLIGISLSAAISFGLGIGFSALGGVLVVSGLLCLLVKQEVSEERPEEIPAVQPEEIPGVPTPFKPALDEAQKEQKAQKIL  
EQLPKELDQLDRYIQEVVSCFRKLKDLKCEDQGLLKDAKEKLQVDFVWKDMMTEFVELQQIIVQEGWYKELHIQNLDDLGPNFLFND  
RLSEHCVSCLYLEELCGYLPBGDARASRLKRLREVVARFMKVVDHTRKVAITFERNNYGVAKKTFEETFRALEDVCVRSLSKSYRDAFYE  
YEKAKILRSGHIEWLRDDRNSVLAEQRFQDARDRWEYLKETVFWVKEDGSIDIEDVANPSAWNDRFPVRMFFQDRQDKILGDESWE  
WWGGCRKAYHTSHAVLQAAFEKDKSKDNLQVKKKHDERMFTFFQKNCREYQKALERLRELQALYPEVSVSLVEAGREENLGSNLE  
RAYENLEEKYQRCVRDQEDYWRKVEKEEAFFRANGTKIRSMEEVLGYIQILEDLIESWSLKINKFEQSVLGFNFVETQELDNKILFHATN  
RLNVLGEDIKDMLSRVEEIEMLLRVIELPLPIKQALEKAFVQYNSCKAKLTKVEPCFRESPAYITSEERLQSLDQTLERAYKEYQKRFQEP  
SRLESEVSGCREHLREQVKQFETQGLDLIKEELIFVSDVLFKRMVSRVSTVHVPMFEFYEYFELHRLRLRAQWMANAEIYSKVRKAFF  
EMLKETLEKAKAPREEEYWLLCEERKSKEKRLILNKIEAAQQRVKDLEPPPIKETGKQKRK

>core/69/4/Org4\_Gene683

MLLLISGALFTLIGPGLSGAISFSLGIGLSALGGVLMISGLLCLLVKREVSEERPEEIPVQPEGVPLAPSEEPALQAAQKTLAQLPKELDQL  
DIDIQEVFACLRKLKDSKYESRSLQDAKEKLRIKDFVVEDALSEIFELRQIVDQEGWDLNFLINGGRSLMVTAEPESLDFHVWVKRLGYL

PSGDVRGEELKKSVEIVARLMRLYCEIHKVAVAFDRNSYAMA EKAFKALGALEESVYRSLTQSYRDKFLESERAKILWNGHITWLRD  
DAKSGCAEKKLRDAEERWKKFRKAVFWVEEDGRIEITYVIGDRGEVLEPYRQERMNEITFHELYDKITSVKDTHRKYALAKTTFEKKRSR  
RNLQAVEEANACRLKYVRDWYDQEFQKAGERLEKLHALYPEVSVSIRENRIQATRSNLEKAYEAIEENYRCCVREQEDYWKEEEKREAE  
FREKGTKVYSPEEVSEHLQILEDLLEVCSTQLTIAEVVVLGVGLEATEEIEYILSDAANRLKVLCEDADDMTFRIKEIEMMLRMAELPLLPI  
KQAFNAFVQYNCKENLAKVEPYCQESPAYVNSNKRLES LDQALQNVYQEQKRFQKGASGLESEVSAYREYLREQITEFETQGLDVIK  
EELLFVSSTLKS KSSYDPLIAKVPCMKFYYQYYDGIDKARVQSRWLEKSERYRKAKKGFQEMLKEGLFKEDQALKEEDYRLYREERMNKE  
SHLICNKIAAARRRVQEFESMEISEIPEEKAGFMDKARSLFTREDRS

>core/106/4/Org4\_Gene361

MATPAQKSPTFQDPSFVRELGSNHPVFSPLTLEERGEMAIAPVQQCGWNHTIVKVSFILALLTILGGGLLVGLLPAVPMFIGTGLIALG  
AVIFALALILCLCDSQGLPEELPPVPEPQQIQIEYLRNETREVLEGTLLLEVLLKDRDAKDPVPVQVVVDCEKRLGMLDRKLRREEEILYRST  
AHLKDEARYEFLELLEMRSLVADRLEFNRRSYERFVQGIMTVRSEEGEKEISRLQDLIGLQQQTVQDLRSQIDDEQKRCWTS LQRIHQ  
SQKDIQRAHDREASQRACEGTEMDC AERHQLEKDLRRQLKSMREWIMRGTIHQQEKAWRKQNAKLERLQEDLRLTKIAFDEQPLF  
YREYKEKYL SQKLD MQILQEVNAEKSEKARLKS LVRDYEKQLEQQDANLKKAKAIWEEELGKQQLKDHEQTQEIKRLNTFMLEYQDG  
LRAEQVAEQVRQDLRQLEEKYSHLQEEKQEKEKILEQSVNHFAERFEALQKENVVYKKKLADLEGAAAPTEIREEDGWILAGSASLSQ  
KKIRELNEENQELLKLLAFKTRELTQLAADVGAEKEISKLREQIEEQKEELRVLDTMHSEAVKDCEAAQRKCRDLEGLLSPVREDAGMR  
FELEIELQRLREENAQLRLEVERLEQEQLQG

>core/208/4/Org4\_Gene991

MQRDGRFKWLQDEDTSAHAEQRFRDINGCWEDLKQTIFWVGEHDCMDIETVRKSYMMWLD RYADKFILREKEEKMKRHELPHAT  
MVRKASGHAYAKAKAAFEKERSNENQRKVKDIEKWLSKGLAEFRNQESRRARERLRELQTLPGVSVEERVLERQRTKKVNLENLYAD  
IEKKYHHCVREQEHWKEVENKEAEFRENREKVLSTEEVLECLQRLEDCLTWSKQLTKAEGSVFEMMFDATEELGNKVLSDV TNRLEI  
LCEDA EEMIFRIEEIEMTLRMVELPLLFMKNTFEKASLQYNSCKEMLAKAEPHCKESA IYRSSEERLERLNRDLQTAYTNCHERLQGFSKL  
ESEVRTCKDHLREQMKHFEVQGLNFINEELLWVGAEFLTQARLDLVATVPYMEFY LQYHNIKREKVR SQWMAKTERYREIRQAFQGV  
MKEDLLAEDTILKEEDYWLLRDDWLLRDERKNRQRR LICNKIAAAQQRVKGF

>core/209/4/Org4\_Gene637

MLGILLIASGII FLAVAIPGLSSAVALGLGCGMTALGTVLLITGLVSLIRSEQLALEQVEIKQARTRVNNELDQLSQYVFYTENVLDNLKRW  
SYRDLGFVRQAQEEVTNLEQDIEEIFLTRDIRNALDNEEFFMTHAKQCLAQVGESLFQDASIDEFINLAHLSEIRQHLDINDPRWSMIT  
KKVKGTVVRFIYVSTMYKQIKSNFEKSDFGQLRKMLLN NYKTIEEVLYQS FQKGYNRAALLSEKTRIHTSSLLHWEKDEDKHLN IKNECA  
SRLENFKKFRTLFLGLSEEDVIDFTGASGWDCSKLPRKELPLDGGKKKLRFKRTFADEQVGDWDR TTSLEHMTPQEEDPLDKLMDQVE

QEATSVLKDQDRYWKEIETSEAKFRSLPQEDDFEKQSQIDSYIRLDDHLSVWANQLSAAEDALIEVTDVQEHGNREMLKNIQQGLELI  
EDAVKATLPRVDFIQELLEKEELPLVAARMSLENSYLKISS

>core/341/4/Org4\_Gene932

MVVSIIYSEILSFSELTSCKHSFPFGPIETASIRIHVFNVVIVCLILGTLFVCLGMVFLGVFSTYLLGMSSMILGLLISIGLALLKFERYGLE  
PKELFGVEGGFDKKLPSEIIQMQDQIADLARELDLEQKKDTLIRGFSARLDVLEGSKTEKKQILKIGVPRNLSEIQERAQELNSILEQCKEA  
LLFRRKSAQEIFKKLYDRKAAFWRSYREDLWCYSEIHVSKKALSPLYIDGVFEGTAPHFLMEAYAMCRTAKNLRNYVKVCVEDMRMRI  
DEEKKRAKQLSVSELLCCCTEIEDLENETNLFTSDSEDLVEEYQIHCIQVMTMLHALWAIYNDEVVCRKPIDTLDRVRARMAVEDCIETFE  
ELQMCVVHTKTLELEIAQLYVDILLEA

>core/380/4/Org4\_Gene764

MEVYSFHPAVRTSFQHRVMAGLDNWFFLGGYRLKVFLDKNNCGWACQKLVSISKTEKILKILSYLLVPIVLIALLIRCFLHARFKCTWN  
RDSLIDSRVPSDVRPFHDFRLFNQERLNIWKNRIYVSGVDVLVASVDYLSQSFSGFNHHPKAIRCENYVRNGQFSEEGKKSYLRGMLT  
HIVGYILSVDETYWEDVILKIPAMNILEAAYSRSVSTDPNYQHGGVYFLDKSLQVPARHVLGEGNMLNTAKWMHIRAERPGEKEGEC  
IAKQFLKDYCKKHLEVMNCPDFIESLLDEKIREFHCPSVLNSAVCDIIDHKCQEHLLKAIINEANRRRLPGMKNSSFTMCGDQVLFYTVFSP  
PKLPPAASSAYF

>core/461/4/Org4\_Gene615

MNIYQFSPGVSPNWQASLMARLDSYFCLGGETVTRIISLRPSGLILAKKEKAVVVSIAAKILKILSFILFPLVLTALAIRYLLYNKFNKDLDRAV  
FFIPTEITKTEELIIAKNPALVKEAALNVSPFFYSLPKKYQRMKVETPEGKFYKITFSVNLDLLVEDLHLETLDWPTELLKNRPFDFTHPEE  
EKLIKDILLKEEGNEYFSLESKKLLARHMMHNIVVLSEEPGRSAFLGRTAFFPNKYPIAKGGVGIPSTTSNLFITWYCFYFYRAATPQSDHP  
DGCGFILLERLKLGAEFFYCDLRESNTTGFTLLFEGSNKGVLKNHLFIRDE

>core/462/4/Org4\_Gene614

MSNIYSFSPGICPNWQAGLMSKLDLCCFGGETATRIFSMTPSGFSLATEEKVHISTAEEKVILALIFFPIILIALAIRYFLHRKFDRKCFVIP  
QDTPKELELILAAANPQLVEKAAREVHPGFFALPTKYQSMYIQTSGQPPKITLSINIDLLLEDLDTDSIPWPKLYLDEDFDFAYYPESKAIID  
TVTKLEKNNPGEEFCLESKKILAHYLLEQLFKLETGLNFPTSTIDGGRESFLIKFSHETKKPTVWAFIYFYHHHSNGPKLEKDFKQAGCEVH  
NRLLNLGLKYRPQAGAQNDCDGGPYGPRGFLIVWEENYGSVLKDHGFIKDN

>core/473/4/Org4\_Gene406

MMTYPVPQNPLLLRILRLMDAFSKSDDERDFYLDRVEGFILYIDLKQEDLNKIYQEELEENAERYCLIPKLTfYEVKKIMETFINEKIYDID  
TKEKFLEILQSKNAREQFLEFIYDHEAELEKWQQFYVERSRIIEWLRNNKFHFVFEEIDLFTKNVLEQLKIHLFDAKVGKEITQARQLLS  
NKAKIYYsNEALNPRPKRGRPPKQSAKVETETTISSDIYTKVPQAARRFLFLPEITSPSSITfSEKFDTEEEFLANLRGSTRVEDQLNLTNLSE  
RFASLKELSAKLGYSLSLSTGDFFGDDEEEEVVTKTKGSKRGRKKSS

>core/556/4/Org4\_Gene319

MASIHPTAIIEPGAIGKDVVIEPYVVIKATVTLCDNVVVKSYAYIDGNTTIGKGTIWP SAMIGNKPQDLKYQGEKTYVTIGENCEIREF  
AIITSSTFEGTTVSIGNNCLIMPWAHVHVNCTIGNNVVLSNHAQLAGHVQVGDYAILGGMVGVHQFVRIGAHAMVGALSGIRRDVP  
PYTIGSGNPYQLAGINKVGLQRRQVPFTTRLALIKAFKKIYRADGCFESLEETLEETLEEYGDIPVKNFIEFCQSPSKRGIER SIDKQALEE  
ESADKEGV LIES

>core/743/4/Org4\_Gene935

MNWAPKTMDHVDPKSETNIRLVISCYKLIKACQLEFPSLVDEVLLGMKCCAWESFKLV RQYQEQA KTVSAKNAPLFCLTRSYYRDGHL  
TPLRAGPRAALS NYLDLRRRENSEKFFNPGHPCYYARLAFNETIQIYRTLFDISKLQIMFESGDYEKGQRENI AVILNFVKTLDDNEKVNFL  
LRHNDTRIPGRESATVFCS

>core/865/4/Org4\_Gene979

MSNIMGSRRKLKRSFLLIEVLMALSLVCAVLLPCIRFYIAIHRSFEE DIFNLQLPALIDHCFLSVEEKMRQQMAEGTVFTSGKGQTVSLAY  
TSQGIGYRIPYGYNVDIRQEV RGDNLKMKVCLADVVELFPDQKQAVSVQRCLCVTL

>core/868/4/Org4\_Gene809

MEEFVAYIVKNLVTNPEAVEIR SIEDEDNESIKLEIRVAAEDIGKIIGRRGNTIHALRTLRRVCSRLKKKVQIDLIQPENGTDVIADQDYICD  
NDSSNSTEDTFGESDTCCSGHCHYDEDLNQEELDQEEQEEDNMHHSCECSNHH

>core/905/4/Org4\_Gene937

MRAGGSLVTTYPKERRRLRSPEQLRVLDDLQSYPNHLHAIELDCDAIPQDLIGATYIITFADFSTYILSLRSYQANSPSDDTWGIWFGSI  
DDPVIADRFQAVISFLKDHGFALPSTLAQDPLLCTNK

>core/920/4/Org4\_Gene578

MRELNAFELTQPEEYRNRWVLMPCCLKRCRTQHAKVWSYRCVHEASLYEKNCFLLTYDDKHLPQYGSLVKLHLQLFLKRLRDRISP  
HKIRYFGCGEYGTKLQRPHYLLIFNYDSLLDG

>core/1056/4/Org4\_Gene448

MIDAENQNPKGGSFTSLHTDPKNLFDEEGMPSHLILYSAISITYSSL

>core/19/5/Org5\_Gene1037

MESFVSEHPLTLQSMIATILRFWSEQGCVIHQGYDLEVAGAGTFNPATFLRALGPEPYKAAYVEPSRRPQDGRYGVHPNRLQNYHQLQ  
VILKVPENFLSLYTESLRAIGLDRDHDIRFIHDDWENPTIGAWGLGWEVWLNGMEITQLTYFQAIGSKPLDTISGEITYGIERIAMYLQ  
KKTSIYDVLWNDTLTYGQITQASEKAWSEYNFDYANTEMWFKHFEDFAEEALRTLKNGLSVPAYDFVIKASHAFNILDARGTISVTERT  
RYIARIRQLTRLVADSYVEWRASLNYPILLSSTSEPKETSESVVPMISSTEDLLEIGSEELPATFVPIGIQQLESARQVLT DHNIVYEGLE  
VLGSPRRLALLVKNVAPEVVQKAFEKKGPMILSLFSPDGDVSPQGQQFFASQGV DISHYQDL SRHASLAIRTVNGSEYLFLLHPEIRLRT  
ADILMQELPLLIQRMKFPKMMVWDNSGVEYARPIRWLVALYGEHILPITLGTIIASRNSFGHRQLDPRKISSPQDYVETLRQACVVVS  
QKERRMII EQGLRAHSSDTISAIPRLIEEATFLSEHPFVSCGQFSEQFCALPKELLIAEMVNHQKYFPTHETSSGAISNFFIVCDNSPN  
DTIIEGNEKALTPRLTDGEFLFKQDLQTPLTTFIEKLKSVTYFEALGSLYDKVERLKAHQRFSTFSSLAASEDLDAIQYCKADLVSAVVNE  
FPELQGIMGEYYLKHANLPTASAVAVGEHLRHITMGQKLSTIGTLLSLDRLDNLLACFILGLKPTSSHDPYALRRQSLEVLTLVSASRLPI  
DLASLLDRLADHFPSTIEEKVWDKSKTIHEILEFIWGRLKTFMGSLEFRKDEIAAVLIDSATKNPIEILDTAEALQLLKEEHTEKLAVITTTN  
RLKKILSSLKLSMTSSPIEVLGDRESNFKQVLDAFPGF PKETSAHAFLEYFLSLADLSNDIQDFLNTVHIANDDGAIRNLRI SLLLTAMDKFS  
LHWESVAV

>core/78/5/Org5\_Gene341

MRIYQQDLFCRLCRDPAWFFSLLSFTLRFYCLGRGWTLSSFFYKHQKKFIGIVIAVVCVSGIGVGWGRFSRKGSAESTSRRTVFTTASGK  
RYVEKDFMAMKKFFAHEAYPFTGNPRAWNFINEGLLDYFLTTTRVGEKFLKVVYHPGEKIFSKEKAYQPYRRFDAPFISSEEVWKSSAP  
QLLEILKV FQQIENPISKEGFLARAKLFLEERRFPHYVLRQMLEYRRQMFALPPDEALSRGKDLRLFGYQTIQDWFGDAYLSAAVELLIRFI

DEQKKVLPRPSKQEARDDFYDKAKHAYTKISKNKEFSLGFEEFVNSYFQFLEISESEFFNMYRDILLCKRALLLQGGVSFDFQPLTTFFVQ  
GKDSIQVEFFRLPKEYSFKTKQELKAFEVYLKLVSLPKSDSLDVPNEILPIATIKAKEPRLVGRRFSIDYKRVALQDLAATVPMVEVLHWQ  
QNSEHFQEILQQFPDVETCQSYKDFQHLKPALRDKISLFTRKEILRARPERILQSLQQVPKQSQEVLLSAGKNSALPGISDGQQLAKVLE  
NEVLDLYSQDAETYTYIIVNSSFEKEEVLPLYREVLRDLASQLLTSHGHLVDMERLESALRTRYPGEEGASLWQRRLLWKVVENHRLGRH  
LEGFSWSLDRSLKTFSRGDKELPQEFDRIFSMKVG DYSSVFMSPNEGPCYYQCLSHLLYDRPASVDKLF LAKSQLDEELLGSYMERFIE  
QGVVR

>core/173/5/Org5\_Gene103

MFKSFIVRYMFVGGGLVSFLLPIPDLECANNVTKTYDKKASVISRDLKLQEDCQKFWNLDPYKLES LCAYQVLYHDDYSSKRIRELFPQIQK  
DEVPIFATMILT LGKVDRGFSPEEISLIQKLSYPGLSLASLRGSTEIDPNTDLARALVSEFSGDLGKNRADYYSNCLDILALRIHAERQRYL  
DQSPCVPGTSEFHKATIEAINTILFYEEAVRYP SKKEMFSDEFSLSSVTDRKFGVCLGVSSLYFSLSQRLDLP LEAVTPPGHIYLR YQGGEV  
NIETTAGGRHLPTASYCDCLDLEDLQVRTPEEMIGLTFMNQGSFALQKKKYKEAEEAYKKAQEYLGDEELQELLGFVQILGGKKKEGKS  
LIGKSPRASQKGSVAYDY LKGRINIPTLALLFSYPGSNYEEIASYEEELKKAMKSSMPCCEGQRRLASVAFHLGKTAE AVALLEKCVEDIPN  
DLSLHLRLCKILCDRHEYTKALKYFIIAERLMEDQGFLKKDNRSFALFYEVKKIISKVAPQKANTLLL MESER

>core/574/5/Org5\_Gene71

MLLIYCKKKEIHLQWPQTAKIRFTP KIAMKV KINDQLICIPPFISARWSQIAFIESQEGENKDQGT LRLHLIDGKIISIPNLDQSIIDIAFQEH  
LLYLETSQSGKEDSRDDDKLGVGVL MNVLQQITKGNDIQVLPKNLISPLFSGTNPIEAILQHTPEHKDHPDAPTDVLEKMADVIRVLSG  
NNATLLPRPEPHCNCMH CQIGRVMNEEDTLAVSDKDLTFR TWDIMQSGDKLYIVTNPLNPSDQFSVYLGPPIGCTCGEPNCEHIKAVL  
YT

>core/669/5/Org5\_Gene170

MNKKILVLCTAMFFIVCFGLIHKKHTILPPKAHIPTNAKHFTIGNPYAPINITVFEPPSCSACAEFTTEVFLLKKHYIDTGEISFTLIPVCFI  
RGSKPAAQALLCIYHHDPRQADIDAYMEYFHRILTYPKEEGSHWATPEVLT KLAEGLKINSGRSVNPKGLEQCIASGQYNEQIKKNNLY  
GSQVLGGQLATPTAVVGDYLIEDPTFHEIERAIQHIRQLQAVEGDHDD

>core/794/5/Org5\_Gene1063

MSLVSYLSNPQKALVLGSKGFSMDCVDNLKLYIFRLKLP GDTERISYSISPEYIREKGEEELLNSPIEVEGSLGRIDSDQWILSLSLKTQLGLC  
CPVCNNFFSHSVCLPDLQRVISHDEVGSGVFDCRPLIRQELLLESDCFEEC SGQGC PERKNILKFLEDRKKHEGN NPFEYL

>core/901/5/Org5\_Gene54

MKNKMDYKSQLVFSCPCCKGNVCFSVFNLDVILTCNVCSSTYTFDSVIRNEIRQFVALCKRIHDANSILGNATVSVSVEDNQMDIPFQ  
LLFSRFPVVLNLSLDGKKIAIRFLFDALNTSILHQESDLIS

>core/1016/5/Org5\_Gene725

MRNMEAKKIKELSKEAQLKKLREKSRVLDEKNKRKAWVAKLVAMPESIREIEKEERVETPQLFQAIAEKILEEGV

>core/1022/5/Org5\_Gene818

MWYKSLAGEEKDVSGNECNDYPEVFKDDVSAYVLVTCGQMSSEGKIQVEMTYEGDPAVISYLLTKARDSLDES

>core/1049/5/Org5\_Gene865

MRVMRFFCLFFLGFLGSFHCVAEDKGVDLFGVWDDNQITECDDSYMTEGREEVEKVVDA
